# Supplementary material for: Pyrazine functionalization to boost the antenna effect in rare-earth metal–organic frameworks for tetracycline detection
Source: Royal Society of Chemistry journal article supplement (doi:10.1039/d2qi00214k), 2022-01-01
Supplement: d2qi00214k1.pdf [file d2qi00214k1.pdf]

## *Electronic Supplementary Information for*

### **Pyrazine Functionalization to Boost Antenna Effect in Rare Earth Metal-Organic Frameworks for Tetracyclines Detection**

Kun Wu,<sup>†a</sup> Xin-Yi Liu,<sup>†a</sup> Yong-Liang Huang,<sup>b</sup> Mo Xie,<sup>a</sup> Xiao Xiong,<sup>a</sup> Ji Zheng,<sup>a</sup> Weigang Lu,<sup>\*a</sup> and Dan Li<sup>\*a</sup>

<sup>a</sup>College of Chemistry and Materials Science, Guangdong Provincial Key Laboratory of Functional Supramolecular Coordination Materials and Applications, Jinan University, Guangzhou, Guangdong 510632, P. R. China

<sup>b</sup>Department of Chemistry, Shantou University Medical College, Shantou, Guangdong 515041, P. R. China

† These authors contributed equally to this work.

E-mail: weiganglu@jnu.edu.cn, danli@jnu.edu.cn

|                                                                              |     |
|------------------------------------------------------------------------------|-----|
| Section 1. Synthesis of <b>JNU-205-RE</b> and <b>JNU-206-RE</b> .....        | S2  |
| 1.1. Materials and physical measurements.....                                | S2  |
| 1.2. Synthesis of H <sub>4</sub> BTEB and H <sub>4</sub> BTTB.....           | S2  |
| 1.3. Synthesis of <b>JNU-205-RE</b> .....                                    | S4  |
| 1.4. Syntheses of <b>JNU-206-RE</b> .....                                    | S7  |
| Section 2. Characterization of <b>JNU-205-RE</b> and <b>JNU-206-RE</b> ..... | S11 |
| 2.1 Crystal structure of <b>JNU-205-RE</b> .....                             | S11 |
| 2.2 Crystal structure of <b>JNU-206-RE</b> .....                             | S12 |
| 2.3 Desktop SEM images of <b>JNU-205-RE</b> .....                            | S16 |
| 2.4 Desktop SEM images of <b>JNU-206-RE</b> .....                            | S19 |
| 2.5 FT-IR spectra of <b>JNU-206-RE</b> .....                                 | S22 |
| 2.6 Crystallographic data of <b>JNU-205-RE</b> .....                         | S27 |
| 2.7 Crystallographic data of <b>JNU-206-RE</b> .....                         | S28 |
| 2.8 TGA of <b>JNU-205-RE</b> and <b>JNU-206-RE</b> .....                     | S41 |
| 2.9 PXRD patterns of <b>JNU-205-RE</b> and <b>JNU-206-RE</b> .....           | S41 |
| 2.10 Luminescence spectra of <b>JNU-205-RE</b> and <b>JNU-206-RE</b> .....   | S46 |
| Section 3. Luminescence sensing of tetracyclines .....                       | S49 |
| Section 4. Electrochemical measurements and computational details .....      | S54 |
| 4.1. Electrochemical measurements .....                                      | S54 |
| 4.2. Computational details .....                                             | S56 |
| 4.3. Lifetime Decay of <b>JNU-206-Eu</b> .....                               | S56 |
| 4.4. XPS of <b>JNU-206-Eu</b> .....                                          | S57 |
| 4.5. Fabrication of <b>JNU-206-Eu-PCL</b> strip.....                         | S59 |
| Appendix.....                                                                | S59 |
| Reference .....                                                              | S65 |

## **Section 1. Synthesis of JNU-205-RE and JNU-206-RE**

### **1.1. Materials and physical measurements**

All reagents and materials were purchased commercially and used as received without further purification.  $\text{RE}(\text{NO}_3)_2 \cdot 6\text{H}_2\text{O}$  and solvents were purchased from Energy Chemical, Shanghai tengzhun Biotechnology Co., Ltd, and Sigma-Aldrich Co., Inc. Fourier transform infrared (FT-IR) spectra were collected on a Thermo Scientific Nicolet iS10 spectrophotometer in the range of 4000–400  $\text{cm}^{-1}$ . Powder X-ray diffraction (PXRD) was performed on Rigaku Ultima IV diffractometer (Cu  $K\alpha$  radiation,  $\lambda = 1.5406 \text{ \AA}$ ). Single-crystal X-ray diffraction (SCXRD) data were collected at 100 K, via an Oxford Cryo stream system on a XtaLAB PRO MM007-DW diffractometer system equipped with a RA-Micro7HF-MR-DW(Cu/Mo) X-ray generator and HyPix-6000HE Hybrid Photon Counting (HPC) X-ray detector (Rigaku, Japan, Cu  $K\alpha$ , graphite monochromator,  $\lambda = 1.54 \text{ \AA}$ ). CCDC-2142283-2142296 contain the supplementary crystallographic data for this paper. These data can be obtained free of charge from the Cambridge Crystallographic Data Centre [www.ccdc.cam.ac.uk/structures](http://www.ccdc.cam.ac.uk/structures). Thermogravimetric analysis (TGA) curves were obtained on Mettler-Toledo (TGA/DSC) thermal analyzer from 40 °C to 800 °C with a heating rate of 10 °C  $\text{min}^{-1}$  under a nitrogen gas atmosphere (20  $\text{mL} \cdot \text{min}^{-1}$ ). Nitrogen gas adsorption/desorption measurements were performed on Micromeritics ASAP 2020 Plus adsorption instrument. Solid- and solution-state UV-Vis absorption spectra were recorded on Agilent Cary 4000. Cyclic voltammetry (CV) measurements were performed on a CHI 660E electrochemical workstation with a three-electrode cell in the supporting electrolyte. X-ray photoelectron spectroscopy (XPS) data were collected on a Thermo ESCALAB 250XI system. Solid- and solution-state luminescence spectra were measured on Horiba FluoroLog-3 spectrofluorometer.

### **1.2. Synthesis of H<sub>4</sub>BTEB and H<sub>4</sub>BTTB**

H<sub>4</sub>BTEB and H<sub>4</sub>BTTB were synthesized according to literature reported method.<sup>1-3</sup>

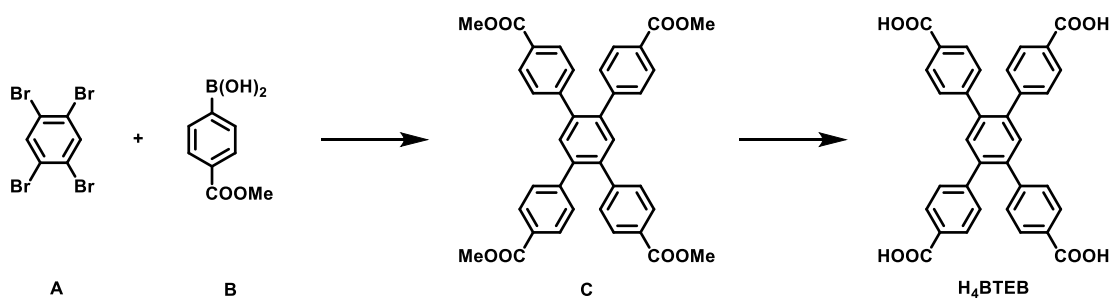

Fig. S1. The synthesis of **H<sub>4</sub>BTEB**.

### Synthesis of **C**

To a solution of **A** (1.01 g, 2.54 mmol), **B** (2.42 g, 11.5 mol), [Pd(PPh<sub>3</sub>)<sub>4</sub>] (0.0881 g, 0.080 mmol), and K<sub>3</sub>PO<sub>4</sub> (2.70 g, 12.70 mmol) in 250 mL of round bottom flask add 1,4-dioxane (100 mL), the resulting mixture was stirred for 96 h at 90 °C under N<sub>2</sub>. After cooled down to room temperature, the reaction mixture was filtered, and the filtrate was evaporated, the residue was subjected to flash column chromatography of silica gel (petroleum ether : ethyl acetate = 4 : 1) to produce the intermediate **C** of 88% yield (1.25 g, 2.03 mmol). <sup>1</sup>H NMR (400 MHz, CD<sub>2</sub>Cl<sub>2</sub>) δ = 3.91 (12H, s), 7.34 (8H, dd), 7.62 (2H, s), 7.94 (8H, dd); <sup>13</sup>C NMR (100 MHz, CD<sub>2</sub>Cl<sub>2</sub>) δ = 67.0, 128.9, 129.3, 129.9, 132.7, 139.5, 144.9, 166.6.

### Synthesis of **H<sub>4</sub>BTEB**

To a solution of **C** (2.0 g, 32.5 mmol) in THF/H<sub>2</sub>O (1:1, 50 mL), add NaOH (2.0 g, 50. mmol), the resulting mixture was refluxed for 12 h. After cooled down to room temperature, THF was removed by rotary evaporator, and the remaining solution was acidified to pH = 3 with HCl (2.0 M). The precipitate was filtered and washed with distilled water to afford **H<sub>4</sub>BTEB** as a white solid (1.04 g, 1.87 mmol). <sup>1</sup>H NMR (400 MHz, DMSO-*d*<sub>6</sub>) δ = 7.36 (8H, dd), 7.57 (2H, s), 7.84 (8H, dd), 12.99 (4H, s); <sup>13</sup>C NMR (100 MHz, DMSO-*d*<sub>6</sub>) δ = 129.7, 129.9, 130.4, 139.4, 144.7, 167.5.

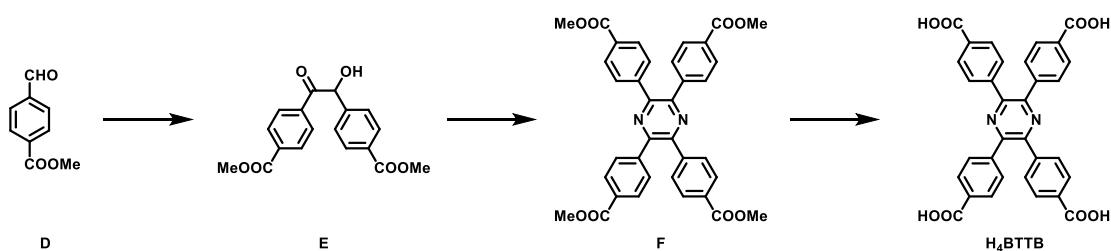

Fig. S2. The synthesis of **H<sub>4</sub>BTTB**.

#### Synthesis of **E**

To a solution of VB<sub>1</sub> (6.0 g, 20 mmol) in a mixed solvent of CH<sub>3</sub>OH (90 mL) and H<sub>2</sub>O (30 mL), add NaOH (16.6 mL, 2 M) dropwise to adjust the pH to 9–10, then add **D** (50.0 g, 305 mmol). The resulting mixture was stirred for 1 h in ice bath, then it was heated at 60 °C for 1 h and at 85 °C for 3 h. The precipitate was filtered to produce **E**. <sup>1</sup>H NMR (400 MHz, CDCl<sub>3</sub>): δ = 3.89 (3H, s), δ = 3.93 (3H, s), δ = 4.57 (1H, s), δ = 6.03 (1H, s), 7.42 (2H, dt), 7.94 (2H, dt), δ = 8.00 (2H, dt), δ = 8.07 (2H, dt); <sup>13</sup>C NMR (100 MHz, CDCl<sub>3</sub>) δ = 52.2, 52.7, 127.8, 128.9, 129.9, 130.5, 134.7, 136.6, 143.0, 165.8, 166.4, 198.3.

#### Synthesis of **F**

To a solution of **E** (30.1 g, 91.7 mmol) and CH<sub>3</sub>COONH<sub>4</sub> (12 g, 155.7 mmol) in 90 mL of CH<sub>3</sub>COOH, add acetic anhydride (9 mL, 91.7 mmol). After being stirred for 12 h at 120 °C under N<sub>2</sub>, the dark orange precipitate was filtered and washed with diethyl ether to afford **F** (20.0 g, 32.5 mmol). <sup>1</sup>H NMR (400 MHz, CDCl<sub>3</sub>): δ = 3.96 (12H, s), 7.71 (8H, dt), 8.03 (8H, dt); <sup>13</sup>C NMR (100 MHz, CDCl<sub>3</sub>) δ = 52.3, 129.7, 129.9, 130.6, 142.0, 148.3, 166.6.

#### Synthesis of **H<sub>4</sub>BTTB**

To a solution of **F** (20.0 g, 32.5 mmol) in THF/H<sub>2</sub>O (1:1, 250 mL), add NaOH (20.0 g, 500. mmol), the resulting mixture was refluxed for 12 h. THF was removed by rotary evaporator, and the remaining solution was acidified to pH = 3 with HCl (2.0 M). The precipitate was filtered and washed with distilled water to afford **H<sub>4</sub>BTTB** as a light-yellow solid (16.18 g, 28.9 mmol). <sup>1</sup>H NMR (400 MHz, DMSO-*d*<sub>6</sub>): δ = 7.67 (8H, dt), 7.94 (8H, dt); <sup>13</sup>C NMR (100 MHz, DMSO-*d*<sub>6</sub>) δ = 129.8, 130.4, 131.7, 142.8, 148.3, 167.4.

### 1.3. Synthesis of JNU-205-RE

#### JNU-205-Eu

A solution of Eu(NO<sub>3</sub>)<sub>3</sub>·6H<sub>2</sub>O (0.0336 mmol, 15 mg), H<sub>4</sub>BTEB (0.0180 mmol, 10 mg), 2-fluorobenzoic acid (950 mg, 6.83 mmol), and *N,N*-dimethylformamide (DMF, 3 mL)

was added in a 10 mL glass vial, followed by heating at 120 °C for 72 h. After it was cooled to room temperature at a rate of 5 °C/h, colorless hexagonal crystals of **JNU-205-Eu** were obtained in a yield of 55 % based on H<sub>4</sub>BTEB.

#### **JNU-205-Pr**

A solution of **Pr** (NO<sub>3</sub>)<sub>3</sub>·6H<sub>2</sub>O (0.0345 mmol, 15 mg), H<sub>4</sub>BTEB (0.0180 mmol, 10 mg), 2-fluorobenzoic acid (950 mg, 6.78 mmol), and *N,N*-dimethylformamide (DMF, 3 mL) was added in a 10 mL glass vial, followed by heating at 120 °C for 72 h. After it was cooled to room temperature at a rate of 5 °C/h, colorless hexagonal crystals of **JNU-205-Pr** were obtained in a yield of 36 % based on H<sub>4</sub>BTEB.

#### **JNU-205-Nd**

A solution of Nd(NO<sub>3</sub>)<sub>3</sub>·6H<sub>2</sub>O (0.0342 mmol, 15 mg), H<sub>4</sub>BTEB (0.0180 mmol, 10 mg), 2-fluorobenzoic acid (850 mg, 6.07 mmol), and *N,N*-dimethylformamide (DMF, 3 mL) was added in a 10 mL glass vial, followed by heating at 120 °C for 72 h. After it was cooled to room temperature at a rate of 5 °C/h, colorless hexagonal crystals of **JNU-205-Nd** were obtained in a yield of 61 % based on H<sub>4</sub>BTEB.

#### **JNU-205-Sm**

A solution of Sm(NO<sub>3</sub>)<sub>3</sub>·6H<sub>2</sub>O (0.0337 mmol, 15 mg), H<sub>4</sub>BTEB (0.0176 mmol, 10 mg), 2-fluorobenzoic acid (850 mg, 6.07 mmol), and *N,N*-dimethylformamide (DMF, 3 mL) was added in a 10 mL glass vial, followed by heating at 120 °C for 72 h. After it was cooled to room temperature at a rate of 5 °C/h, colorless hexagonal crystals of **JNU-206-Sm** were obtained in a yield of 56 % based on H<sub>4</sub>BTTB.

#### **JNU-205-Gd**

A solution of Gd(NO<sub>3</sub>)<sub>3</sub>·6H<sub>2</sub>O (0.0332 mmol, 15 mg), H<sub>4</sub>BTEB (0.0180 mmol, 10 mg), 2-fluorobenzoic acid (950 mg, 6.78 mmol), and *N,N*-dimethylformamide (DMF, 3 mL) was added in a 10 mL glass vial, followed by heating at 120 °C for 72 h. After it was cooled to room temperature at a rate of 5 °C/h, colorless hexagonal crystals of **JNU-205-Gd** were obtained in a yield of 49 % based on H<sub>4</sub>BTEB.

#### **JNU-205-Tb**

A solution of Tb(NO<sub>3</sub>)<sub>3</sub>·6H<sub>2</sub>O (0.0331 mmol, 15 mg), H<sub>4</sub>BTEB (0.0180 mmol, 10 mg), 2-fluorobenzoic acid (850 mg, 6.07 mmol), and *N,N*-dimethylformamide (DMF, 3 mL) was added in a 10 mL glass vial, followed by heating at 120 °C for 72 h. After it was

cooled to room temperature at a rate of 5 °C/h, colorless hexagonal crystals of **JNU-205-Tb** were obtained in a yield of 53 % based on H<sub>4</sub>BTEB.

#### **JNU-205-Dy**

A solution of Dy(NO<sub>3</sub>)<sub>3</sub>·6H<sub>2</sub>O (0.0329 mmol, 15 mg), H<sub>4</sub>BTEB (0.0180 mmol, 10 mg), 2-fluorobenzoic acid (950 mg, 6.78 mmol), and *N,N*-dimethylformamide (DMF, 3 mL) was added in a 10 mL glass vial, followed by heating at 120 °C for 72 h. After it was cooled to room temperature at a rate of 5 °C/h, colorless hexagonal crystals of **JNU-205-Dy** were obtained in a yield of 50 % based on H<sub>4</sub>BTEB.

#### **JNU-205-Ho**

A solution of Ho(NO<sub>3</sub>)<sub>3</sub>·6H<sub>2</sub>O (0.0327 mmol, 15 mg), H<sub>4</sub>BTEB (0.0180 mmol, 10 mg), 2-fluorobenzoic acid (950 mg, 6.78 mmol), and *N,N*-dimethylformamide (DMF, 3 mL) was added in a 10 mL glass vial, followed by heating at 120 °C for 72 h. After it was cooled to room temperature at a rate of 5 °C/h, colorless hexagonal crystals of **JNU-205-Ho** were obtained in a yield of 55 % based on H<sub>4</sub>BTEB.

#### **JNU-205-Er**

A solution of Er(NO<sub>3</sub>)<sub>3</sub>·6H<sub>2</sub>O (0.0332 mmol, 15 mg), H<sub>4</sub>BTEB (0.0180 mmol, 10 mg), 2-fluorobenzoic acid (950 mg, 6.78 mmol), and *N,N*-dimethylformamide (DMF, 3 mL) was added in a 10 mL glass vial, followed by heating at 120 °C for 72 h. After it was cooled to room temperature at a rate of 5 °C/h, colorless hexagonal crystals of **JNU-205-Er** were obtained in a yield of 59 % based on H<sub>4</sub>BTEB.

#### **JNU-205-Tm**

A solution of Tm(NO<sub>3</sub>)<sub>3</sub>·6H<sub>2</sub>O (0.0324 mmol, 15 mg), H<sub>4</sub>BTEB (0.0180 mmol, 10 mg), 2-fluorobenzoic acid (850 mg, 6.07 mmol), and *N,N*-dimethylformamide (DMF, 3 mL) was added in a 10 mL glass vial, followed by heating at 120 °C for 72 h. After it was cooled to room temperature at a rate of 5 °C/h, colorless hexagonal crystals of **JNU-205-Tm** were obtained in a yield of 47 % based on H<sub>4</sub>BTEB.

#### **JNU-205-Yb**

A solution of Yb(NO<sub>3</sub>)<sub>3</sub>·6H<sub>2</sub>O (0.0334 mmol, 15 mg), H<sub>4</sub>BTEB (0.0180 mmol, 10 mg), 2-fluorobenzoic acid (950 mg, 6.78 mmol), and *N,N*-dimethylformamide (DMF, 3 mL) was added in a 10 mL glass vial, followed by heating at 120 °C for 72 h. After it was cooled to room temperature at a rate of 5 °C/h, colorless hexagonal crystals of **JNU-**

**205-Yb** were obtained in a yield of 52 % based on H<sub>4</sub>BTEB.

#### **JNU-205-Lu**

A solution of Lu(NO<sub>3</sub>)<sub>3</sub>·6H<sub>2</sub>O (0.0346 mmol, 15 mg), H<sub>4</sub>BTEB (0.0180 mmol, 10 mg), 2-fluorobenzoic acid (1150 mg, 8.21 mmol), and *N,N*-dimethylformamide (DMF, 3 mL) was added in a 10 mL glass vial, followed by heating at 120 °C for 72 h. After it was cooled to room temperature at a rate of 5 °C/h, colorless hexagonal crystals of **JNU-205-Lu** were obtained in a yield of 60 % based on H<sub>4</sub>BTEB.

#### **JNU-205-Y**

A solution of Y(NO<sub>3</sub>)<sub>3</sub>·6H<sub>2</sub>O (0.0392 mmol, 15 mg), H<sub>4</sub>BTEB (0.0180 mmol, 10 mg), 2-fluorobenzoic acid (950 mg, 6.78 mmol), and *N,N*-dimethylformamide (DMF, 3 mL) was added in a 10 mL glass vial, followed by heating at 120 °C for 72 h. After it was cooled to room temperature at a rate of 5 °C/h, colorless hexagonal crystals of **JNU-205-Y** were obtained in a yield of 51 % based on H<sub>4</sub>BTEB.

### **1.4. Syntheses of JNU-206-RE**

#### **JNU-206-Eu**

A solution of Eu(NO<sub>3</sub>)<sub>3</sub>·6H<sub>2</sub>O (0.0336 mmol, 15 mg), H<sub>4</sub>BTTB (0.0176 mmol, 10 mg), 2-fluorobenzoic acid (650 mg, 4.67 mmol), and *N,N*-dimethylformamide (DMF, 3 mL) was added in a 10 mL glass vial, followed by heating at 120 °C for 72 h. After it was cooled to room temperature at a rate of 5 °C/h, colorless hexagonal crystals of **JNU-206-Eu** were obtained in a yield of 56 % based on H<sub>4</sub>BTTB. IR (KBr): 3394 (br, s), 1593 (s), 1540 (s), 1405 (m), 1306 (w), 1181 (w), 1146 (w), 1103 (w), 1045 (s), 1016 (m), 859 (w), 789 (m), 715 (m), 571 (w), 494 (w) cm<sup>-1</sup>.

#### **JNU-206-Pr**

A solution of Pr(NO<sub>3</sub>)<sub>3</sub>·6H<sub>2</sub>O (0.0345 mmol, 15 mg), H<sub>4</sub>BTTB (0.0176 mmol, 10 mg), 2-fluorobenzoic acid (450 mg, 3.24 mmol), and *N,N*-dimethylformamide (DMF, 3 mL) was added in a 10 mL glass vial, followed by heating at 120 °C for 72 h. After it was cooled to room temperature at a rate of 5 °C/h, colorless hexagonal crystals of **JNU-206-Pr** were obtained in a yield of 43 % based on H<sub>4</sub>BTTB. IR (KBr): 3365 (br, s), 1658 (w), 1598 (s), 1557 (w), 1404 (s), 1317 (w), 1096 (w), 1012 (s), 863 (w), 791 (s), 697 (w), 661 (w), 575 (w) cm<sup>-1</sup>.

### **JNU-206-Nd**

A solution of Nd(NO<sub>3</sub>)<sub>3</sub>·6H<sub>2</sub>O (0.0342 mmol, 15 mg), H<sub>4</sub>BTTB (0.0176 mmol, 10 mg), 2-fluorobenzoic acid (550 mg, 3.95 mmol), and *N,N*-dimethylformamide (DMF, 3 mL) was added in a 10 mL glass vial, followed by heating at 120 °C for 72 h. After it was cooled to room temperature at a rate of 5 °C/h, colorless hexagonal crystals of **JNU-206-Nd** were obtained in a yield of 53 % based on H<sub>4</sub>BTTB. IR (KBr): 3361 (br, s), 1656 (m), 1598 (s), 1548 (m), 1404 (m), 1178 (w), 1144 (w), 1096 (s), 1011 (s), 863 (s), 790 (s), 759 (s), 715 (m), 661 (m) cm<sup>-1</sup>.

### **JNU-206-Sm**

A solution of Sm(NO<sub>3</sub>)<sub>3</sub>·6H<sub>2</sub>O (0.0337 mmol, 15 mg), H<sub>4</sub>BTTB (0.0176 mmol, 10 mg), 2-fluorobenzoic acid (550 mg, 3.95 mmol), and *N,N*-dimethylformamide (DMF, 3 mL) was added in a 10 mL glass vial, followed by heating at 120 °C for 72 h. After it was cooled to room temperature at a rate of 5 °C/h, colorless hexagonal crystals of **JNU-206-Sm** were obtained in a yield of 60 % based on H<sub>4</sub>BTTB. IR (KBr): 3377 (br, s), 1656 (m), 1590 (s), 1541 (m), 1386 (m), 1178 (w), 1144 (w), 1103 (s), 1011 (s), 857 (s), 787 (s), 712 (s), 675 (m), 555 (m) cm<sup>-1</sup>.

### **JNU-206-Gd**

A solution of Gd(NO<sub>3</sub>)<sub>3</sub>·6H<sub>2</sub>O (0.0332 mmol, 15 mg), H<sub>4</sub>BTTB (0.0176 mmol, 10 mg), 2-fluorobenzoic acid (750 mg, 5.39 mmol), and *N,N*-dimethylformamide (DMF, 3 mL) was added in a 10 mL glass vial, followed by heating at 120 °C for 72 h. After it was cooled to room temperature at a rate of 5 °C/h, colorless hexagonal crystals of **JNU-206-Gd** were obtained in a yield of 49 % based on H<sub>4</sub>BTTB. IR (KBr): 3344 (br, s), 1660 (m), 1602 (s), 1549 (m), 1406 (w), 1180 (w), 1146 (w), 1100 (m), 1012 (s), 965 (w), 859 (w), 790 (s), 714 (w), 575 (w) cm<sup>-1</sup>.

### **JNU-206-Tb**

A solution of Tb(NO<sub>3</sub>)<sub>3</sub>·6H<sub>2</sub>O (0.0331 mmol, 15 mg), H<sub>4</sub>BTTB (0.0176 mmol, 10 mg), 2-fluorobenzoic acid (750 mg, 5.39 mmol), and *N,N*-dimethylformamide (DMF, 3 mL) was added in a 10 mL glass vial, followed by heating at 120 °C for 72 h. After it was cooled to room temperature at a rate of 5 °C/h, colorless hexagonal crystals of **JNU-206-Tb** were obtained in a yield of 60 % based on H<sub>4</sub>BTTB. IR (KBr): 3354 (br, s),



1656 (s), 1594 (s), 1544 (s), 1387 (m), 1179 (w), 1145 (w), 1101 (s), 1011 (s), 863 (w), 789 (s), 714 (w), 572 (w), 490 (w)  $\text{cm}^{-1}$ .

#### **JNU-206-Dy**

A solution of  $\text{Dy}(\text{NO}_3)_3 \cdot 6\text{H}_2\text{O}$  (0.0329 mmol, 15 mg),  $\text{H}_4\text{BTTB}$  (0.0176 mmol, 10 mg), 2-fluorobenzoic acid (650 mg, 4.67 mmol), and *N,N*-dimethylformamide (DMF, 3 mL) was added in a 10 mL glass vial, followed by heating at 120 °C for 72 h. After it was cooled to room temperature at a rate of 5 °C/h, colorless hexagonal crystals of **JNU-206-Dy** were obtained in a yield of 56 % based on  $\text{H}_4\text{BTTB}$ . IR (KBr): 3362 (br, s), 1656 (m), 1590 (s), 1541 (m), 1386 (w), 1179 (w), 1146 (w), 1100 (m), 1011 (s), 862 (w), 788 (s), 714 (w), 561 (w)  $\text{cm}^{-1}$ .

#### **JNU-206-Ho**

A solution of  $\text{Ho}(\text{NO}_3)_3 \cdot 6\text{H}_2\text{O}$  (0.0327 mmol, 15 mg),  $\text{H}_4\text{BTTB}$  (0.0176 mmol, 10 mg), 2-fluorobenzoic acid (850 mg, 6.11 mmol), and *N,N*-dimethylformamide (DMF, 3 mL) was added in a 10 mL glass vial, followed by heating at 120 °C for 72 h. After it was cooled to room temperature at a rate of 5 °C/h, colorless hexagonal crystals of **JNU-206-Ho** were obtained in a yield of 59 % based on  $\text{H}_4\text{BTTB}$ . IR (KBr): 3343 (br, s), 1656 (m), 1590 (s), 1542 (m), 1386 (w), 1179 (w), 1145 (w), 1105 (m), 1011 (s), 862 (w), 788 (s), 714 (w), 678 (w), 572 (w)  $\text{cm}^{-1}$ .

#### **JNU-206-Er**

A solution of  $\text{Er}(\text{NO}_3)_3 \cdot 6\text{H}_2\text{O}$  (0.0332 mmol, 15 mg),  $\text{H}_4\text{BTTB}$  (0.0176 mmol, 10 mg), 2-fluorobenzoic acid (650 mg, 4.67 mmol), and *N,N*-dimethylformamide (DMF, 3 mL) was added in a 10 mL glass vial, followed by heating at 120 °C for 72 h. After it was cooled to room temperature at a rate of 5 °C/h, colorless hexagonal crystals of **JNU-206-Er** were obtained in a yield of 49 % based on  $\text{H}_4\text{BTTB}$ . IR (KBr): 3325 (br, s), 1660 (m), 1693 (s), 1544 (m), 1386 (w), 1178 (w), 1145 (w), 1097 (m), 1011 (s), 863 (w), 787 (s), 713(w), 565 (w)  $\text{cm}^{-1}$ .

#### **JNU-206-Tm**

A solution of  $\text{Tm}(\text{NO}_3)_3 \cdot 6\text{H}_2\text{O}$  (0.0324 mmol, 15 mg),  $\text{H}_4\text{BTTB}$  (0.0176 mmol, 10 mg), 2-fluorobenzoic acid (650 mg, 4.67 mmol), and *N,N*-dimethylformamide (DMF, 3 mL) was added in a 10 mL glass vial, followed by heating at 120 °C for 72 h., After it was

cooled to room temperature at a rate of 5 °C/h, colorless hexagonal crystals of **JNU-206-Tm** were obtained in a yield of 53 % based on H<sub>4</sub>BTTB. IR (KBr): 3344 (br, s), 1659 (s), 1592 (s), 1544 (m), 1386 (w), 1179 (w), 1146 (w), 1097 (m), 1011 (s), 863 (w), 787 (s), 713 (w), 562 (w) cm<sup>-1</sup>.

#### **JNU-206-Yb**

A solution of Yb(NO<sub>3</sub>)<sub>3</sub>·6H<sub>2</sub>O (0.0334 mmol, 15 mg), H<sub>4</sub>BTTB (0.0176 mmol, 10 mg), 2-fluorobenzoic acid (650 mg, 4.67 mmol), and *N,N*-dimethylformamide (DMF, 3 mL) was added in a 10 mL glass vial, followed by heating at 120 °C for 72 h. After it was cooled to room temperature at a rate of 5 °C/h, colorless hexagonal crystals of **JNU-206-Yb** were obtained in a yield of 61 % based on H<sub>4</sub>BTTB. IR (KBr): 3392 (br, s), 1659 (m), 1592 (s), 1544 (m), 1386 (w), 1178 (w), 1099 (m), 1011 (s), 865 (s), 788 (s), 713 (w), 576 (w) cm<sup>-1</sup>.

#### **JNU-206-Lu**

A solution of Lu(NO<sub>3</sub>)<sub>3</sub>·6H<sub>2</sub>O (0.0346 mmol, 15 mg), H<sub>4</sub>BTTB (0.0176 mmol, 10 mg), 2-fluorobenzoic acid (650 mg, 4.67 mmol), and *N,N*-dimethylformamide (DMF, 3 mL) was added in a 10 mL glass vial, followed by heating at 120 °C for 72 h. After it was cooled to room temperature at a rate of 5 °C/h, colorless hexagonal crystals of **JNU-206-Lu** were obtained in a yield of 60 % based on H<sub>4</sub>BTTB. IR (KBr): 3350 (br, s), 1660 (m), 1594 (s), 1545 (m), 1178 (w), 1146 (w), 1097 (m), 1011 (s), 864 (w), 787 (s), 713 (w), 572 (w) cm<sup>-1</sup>.

#### **JNU-206-Y**

A solution of Y(NO<sub>3</sub>)<sub>3</sub>·6H<sub>2</sub>O (0.0392 mmol, 15 mg), H<sub>4</sub>BTTB (0.0176 mmol, 10 mg), 2-fluorobenzoic acid (600 mg, 4.31 mmol), and *N,N*-dimethylformamide (DMF, 3 mL) was added in a 10 mL glass vial, followed by heating at 120 °C for 72 h. After it was cooled to room temperature at a rate of 5 °C/h, colorless hexagonal crystals of **JNU-206-Y** were obtained in a yield of 48% based on H<sub>4</sub>BTTB. IR (KBr): 3351 (br, s), 1659 (s), 15966 (s), 1541 (s), 1405 (m), 1178 (m), 1144 (w), 1102 (s), 1011 (s), 862 (m), 789 (s), 714 (w), 559 (w), 491 (w) cm<sup>-1</sup>.

## Section 2. Characterization of JNU-205-RE and JNU-206-RE

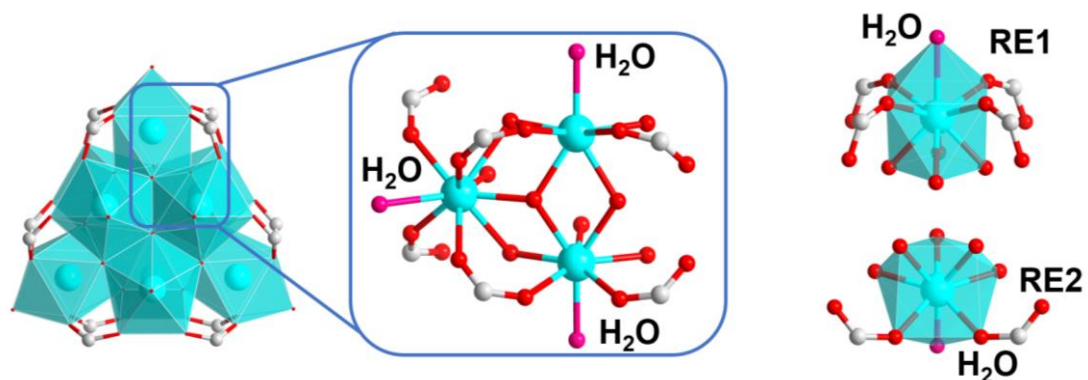

Fig. S3. Local coordination environment of RE1 and RE2.

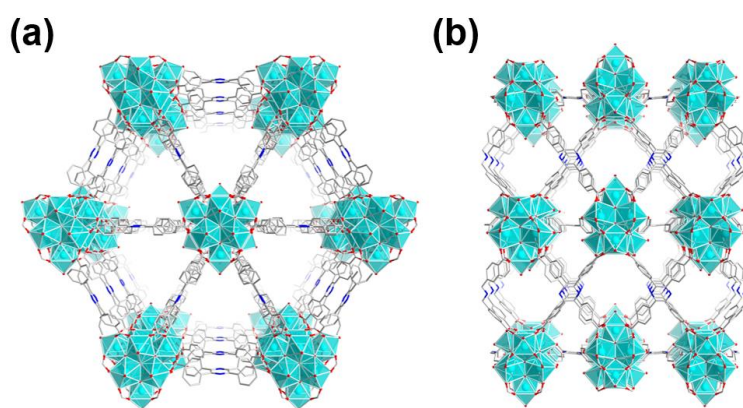

Fig. S4. Ball-and-stick model of the **JNU-206-RE** along (a) a and (b) c directions. (sky blue for RE, red for O, gray for C and blue for N, H atoms are omitted for clarity).

### 2.1 Crystal structure of JNU-205-RE

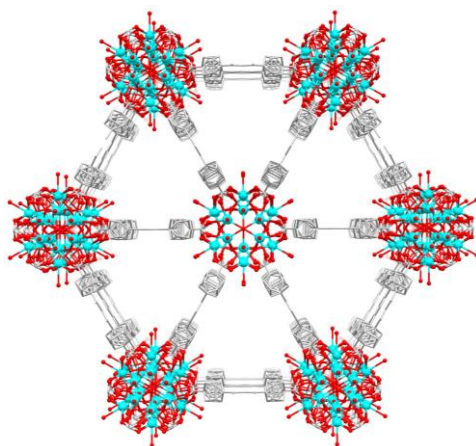

Fig. S5. Crystal structure of **JNU-205-Eu** viewed along [001] direction.

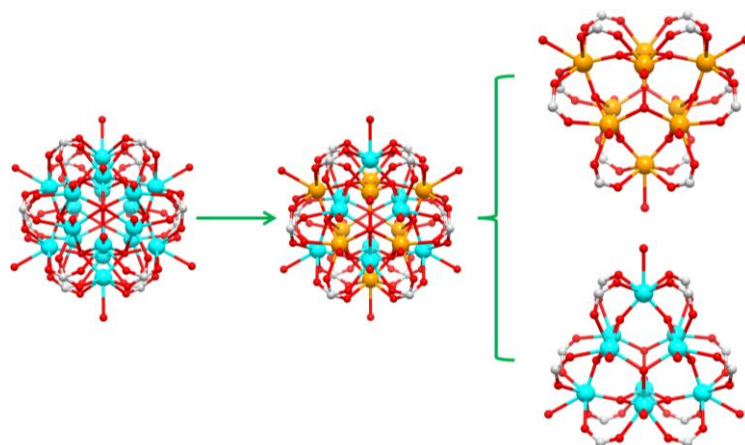

Fig. S6. The disorder of the  $\text{Eu}_9$ -cluster with two sets of orientations in **JNU-205-Eu** (light orange and turquoise).

## 2.2 Crystal structure of JNU-206-RE

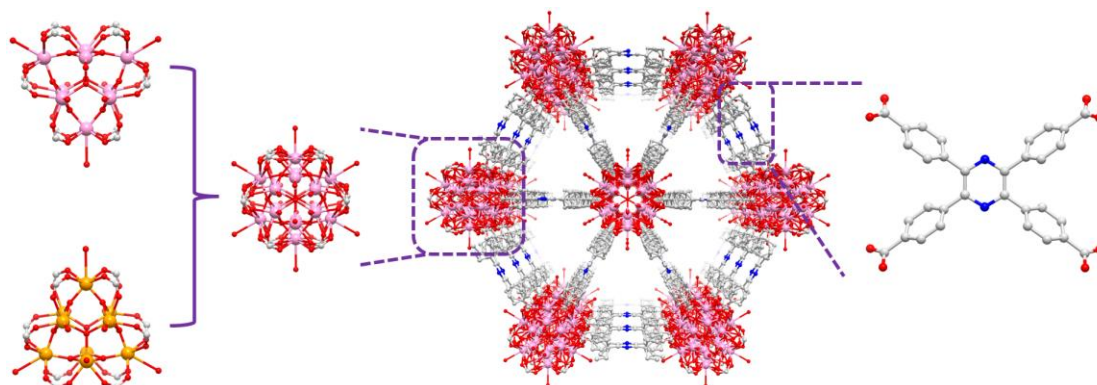

Fig. S7. View of **JNU-206-Pr** along the  $[001]$  direction with uniformed triangular 1D channels (colour code: C, gray; N, blue; O, red; and Pr, rose/light orange. H atoms are omitted for clarity).

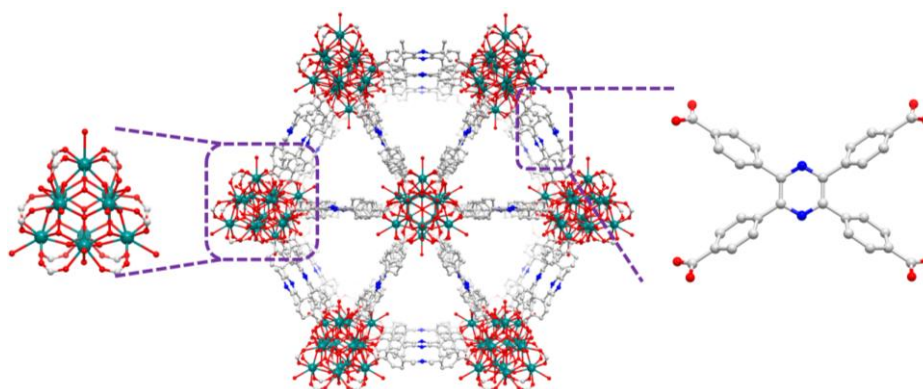

Fig. S8. View of **JNU-206-Nd** along the  $[001]$  direction with uniformed triangular 1D

channels (colour code: C, gray; N, blue; O, red; and Nd, teal. H atoms are omitted for clarity).

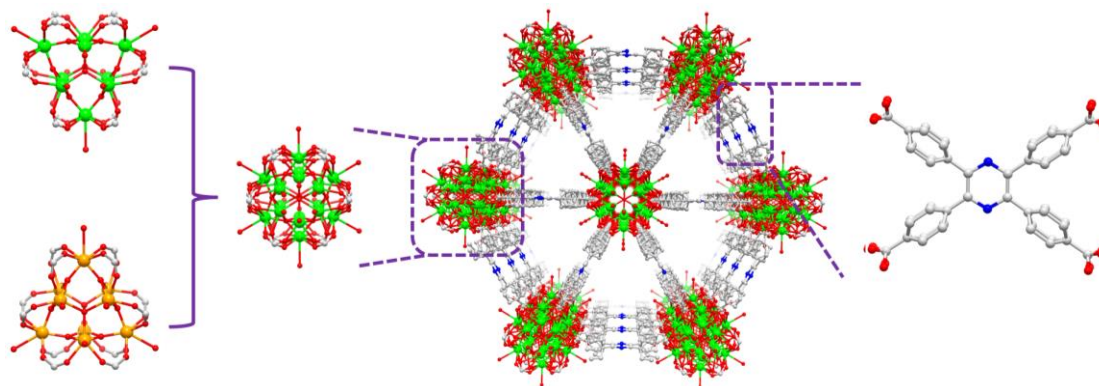

Fig. S9. Views of **JNU-206-Sm** along the [001] direction with uniformed triangular 1D channels (colour code: C, gray; N, blue; O, red; and Sm, bright green/light orange. H atoms are omitted for clarity).

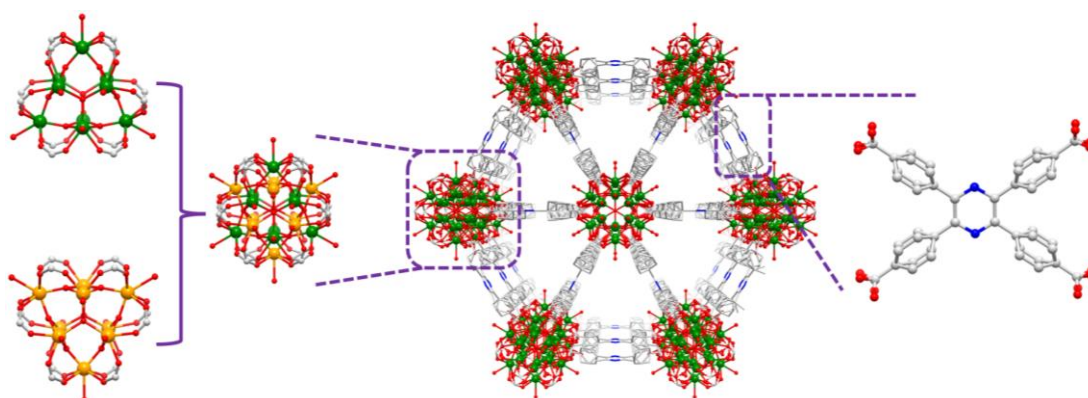

Fig. S10. Views of **JNU-206-Gd** along the [001] direction with uniformed triangular 1D channels (colour code: C, gray; N, blue; O, red; and Gd, green/light orange. H atoms are omitted for clarity).

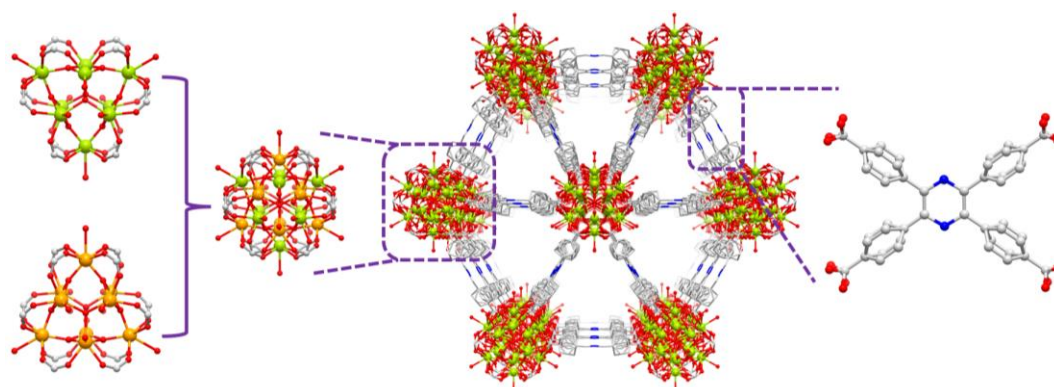

Fig. S11. Views of **JNU-206-Tb** along the [001] direction with uniformed triangular 1D channels (colour code: C, gray; N, blue; O, red; and Tb, lime/light orange. H atoms are omitted for clarity).

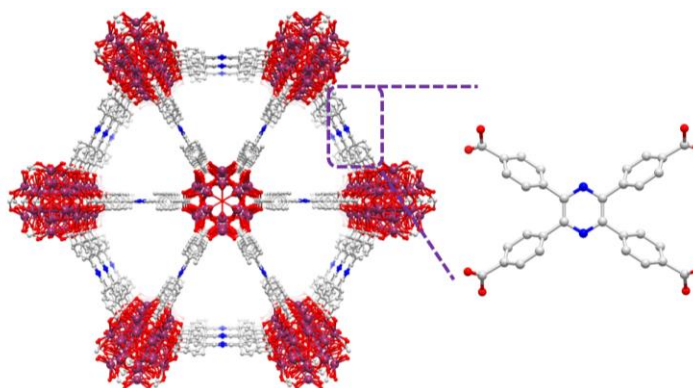

Fig. S12. Views of **JNU-206-Ho** along the [001] direction with uniformed triangular 1D channels (colour code: C, gray; N, blue; O, red; and Ho, plum. H atoms are omitted for clarity).

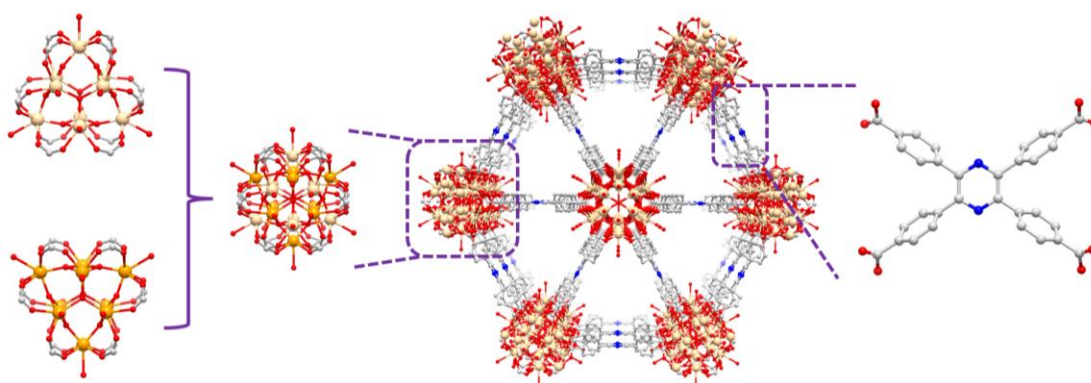

Fig. S13. Views of **JNU-206-Dy** along the [001] direction with uniformed triangular 1D channels (colour code: C, gray; N, blue; O, red; and Dy, tan/light orange. H atoms are omitted for clarity).

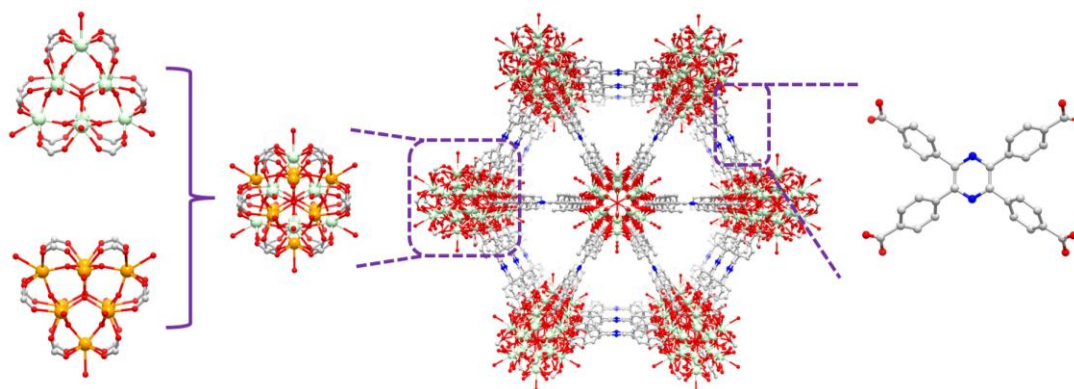

Fig. S14. Views of **JNU-206-Er** along the [001] direction with uniformed triangular 1D channels (colour code: C, gray; N, blue; O, red; and Er, light green/light orange. H atoms are omitted for clarity).

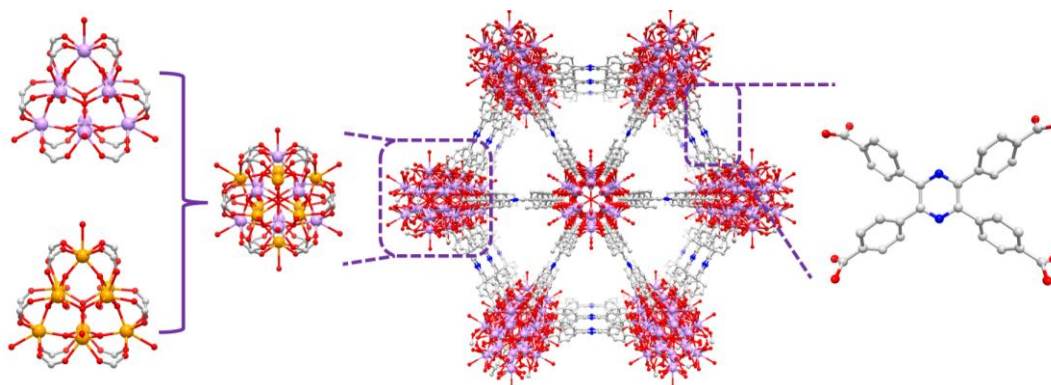

Fig. S15. Views of **JNU-206-Tm** along the [001] direction with uniformed triangular 1D channels (colour code: C, gray; N, blue; O, red; and Tm, lavender/light orange. H atoms are omitted for clarity).

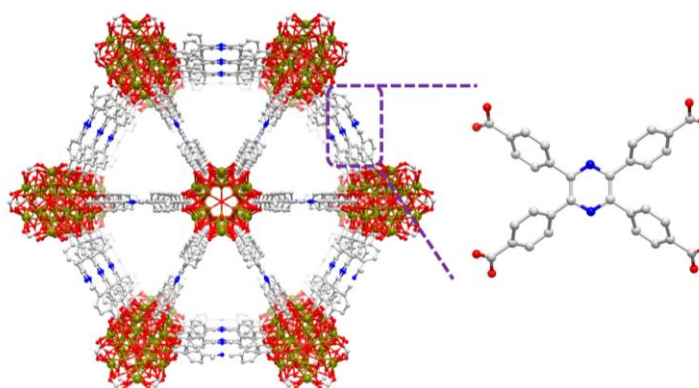

Fig. S16. Views of **JNU-206-Yb** along the [001] direction with uniformed triangular 1D channels (colour code: C, gray; N, blue; O, red; and Yb, dark yellow. H atoms are omitted for clarity).

omitted for clarity).

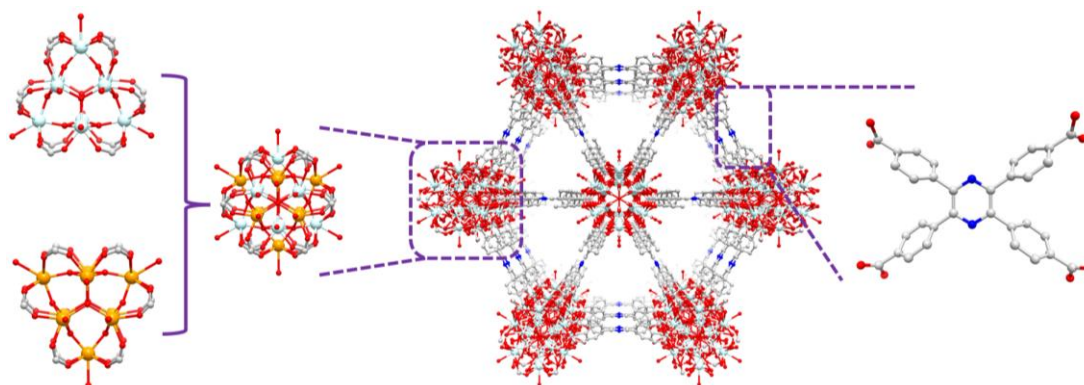

Fig. S17. Views of **JNU-206-Lu** along the [001] direction with uniformed triangular 1D channels (colour code: C, gray; N, blue; O, red; and Lu, light turquoise/light orange. H atoms are omitted for clarity).

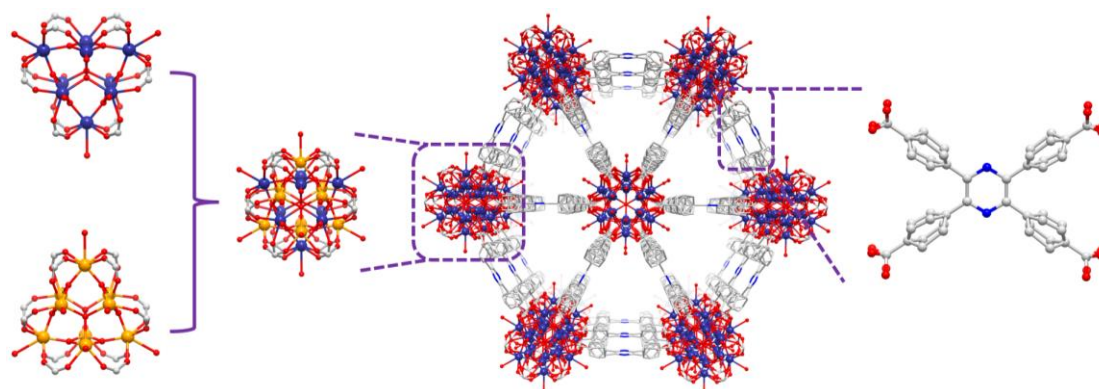

Fig. S18. Views of **JNU-206-Y** along the [001] direction with uniformed triangular 1D channels (colour code: C, gray; N, blue; O, red; and Y, indigo/light orange. H atoms are omitted for clarity).

### 2.3 Desktop SEM images of JNU-205-RE

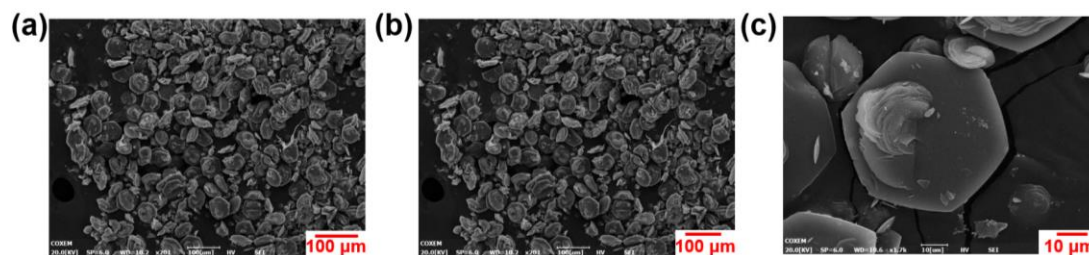

Fig. S19. SEM image of **JNU-205-Eu**.



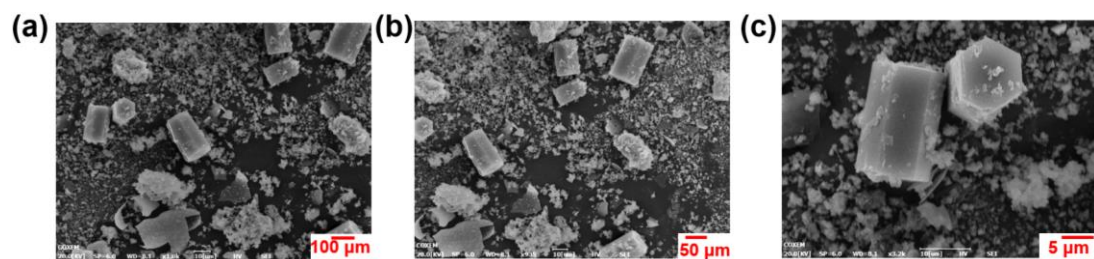

Fig. S20. SEM image of JNU-205-Eu.

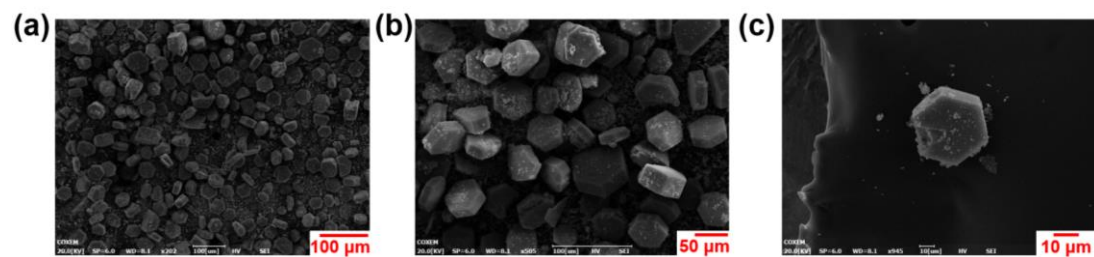

Fig. S21. SEM image of JNU-205-Nd.

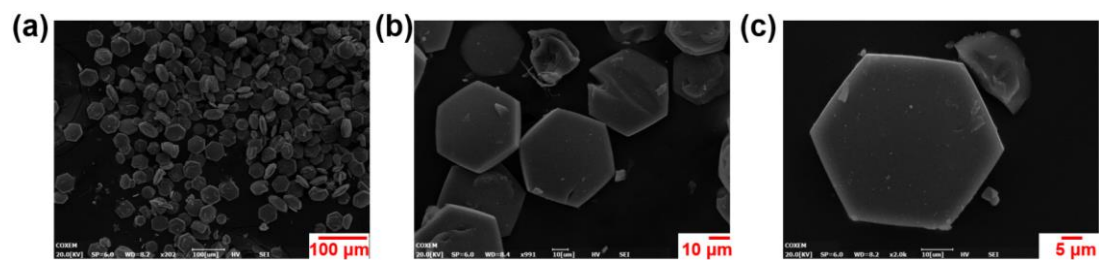

Fig. S22. SEM image of JNU-205-Sm.

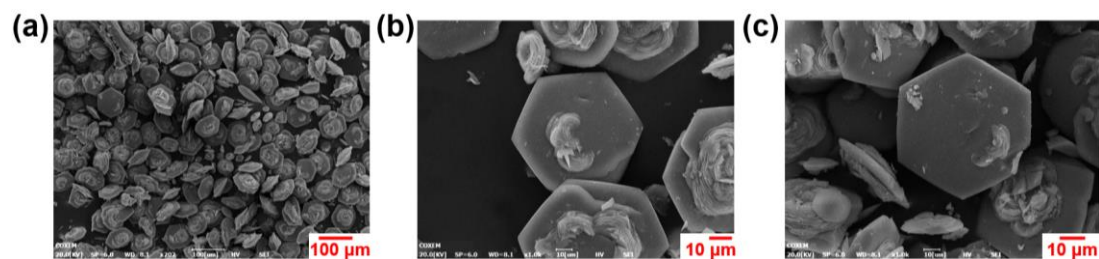

Fig. S23. SEM image of JNU-205-Gd.

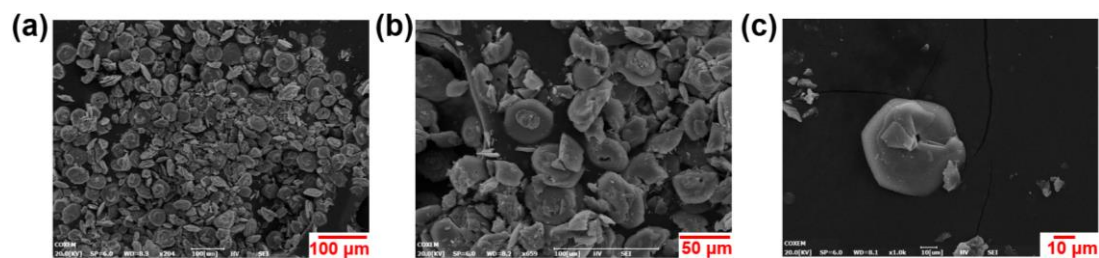

Fig. S24. SEM image of JNU-205-Tb.

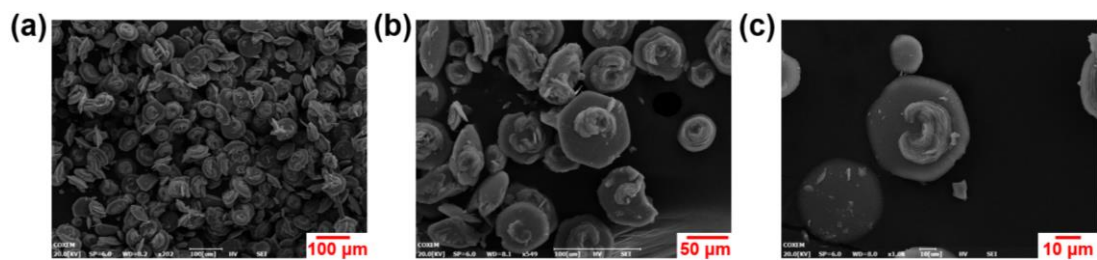

Fig. S25. SEM image of **JNU-205-Dy**.

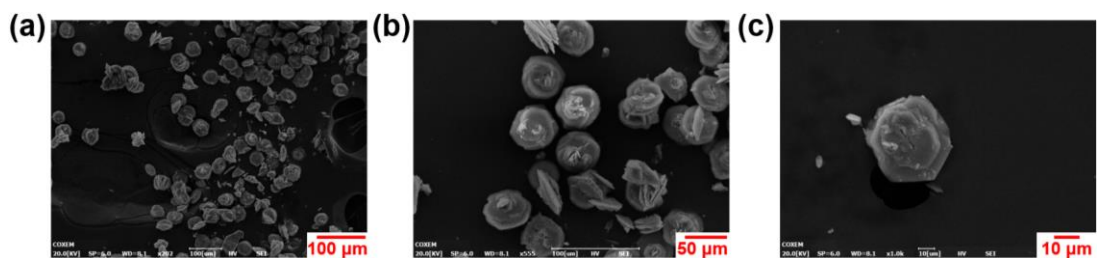

Fig. S26. SEM image of **JNU-205-Ho**.

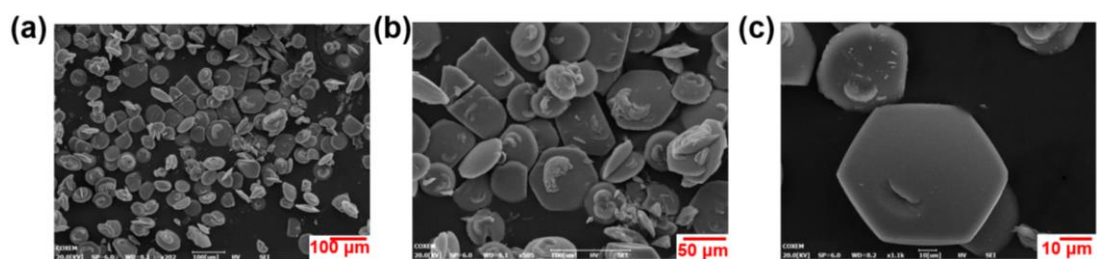

Fig. S27. SEM image of **JNU-205-Er**.

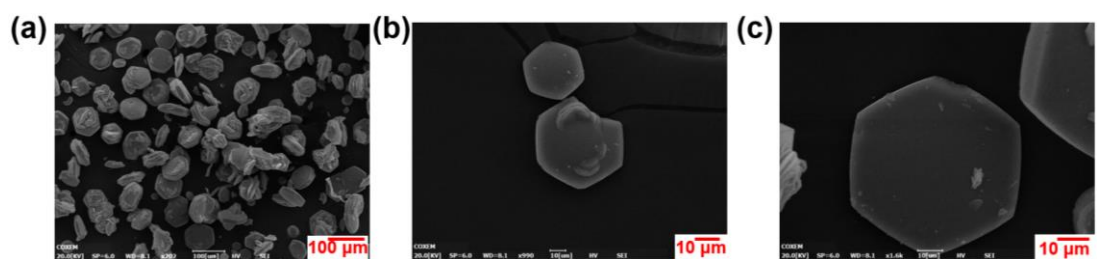

Fig. S28. SEM image of **JNU-205-Tm**.

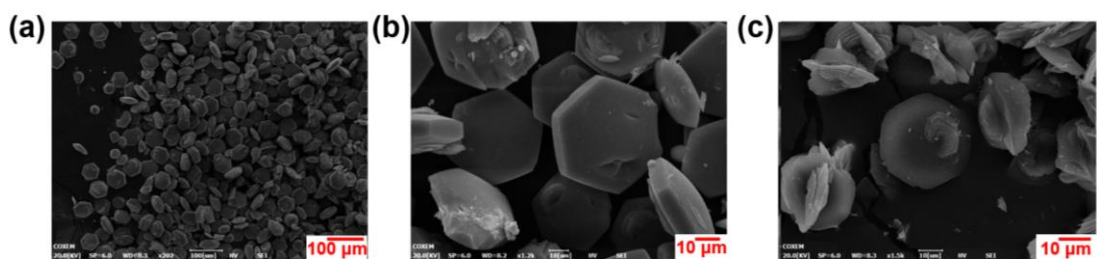

Fig. S29. SEM image of **JNU-205-Yb**.

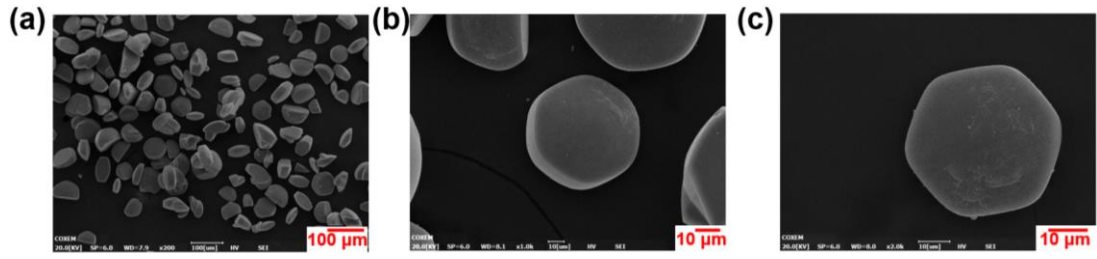

Fig. S30. SEM image of JNU-205-Lu.

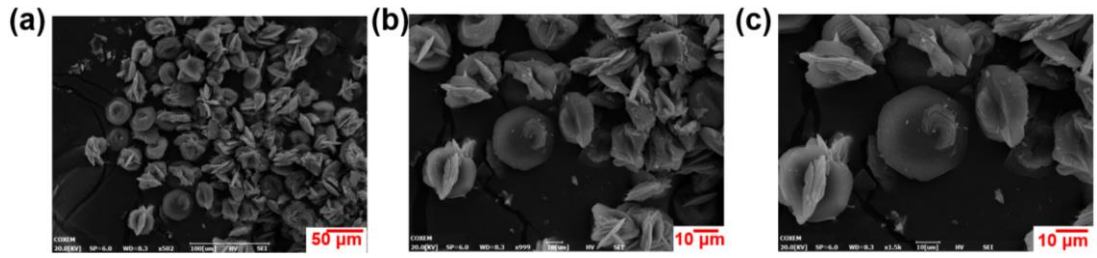

Fig. S31. SEM image of JNU-205-Y.

#### 2.4 Desktop SEM images of JNU-206-RE

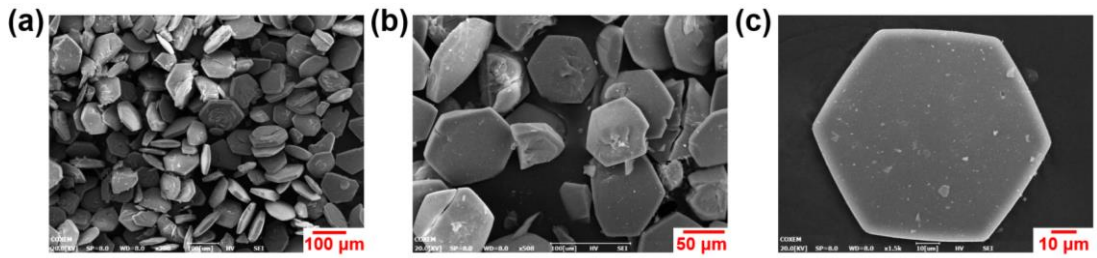

Fig. S32. SEM image of JNU-206-Eu.

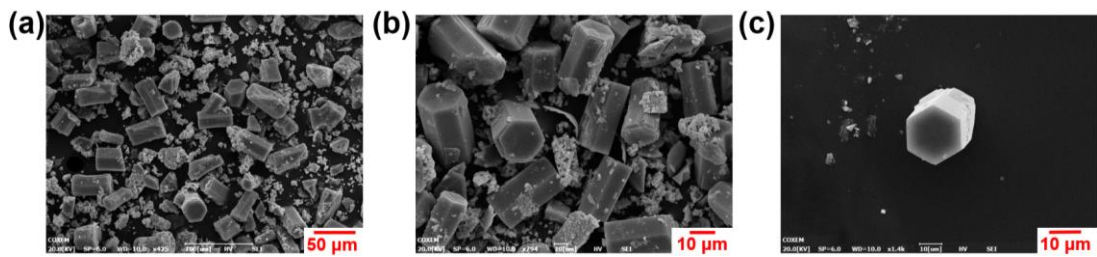

Fig. S33. SEM image of JNU-206-Pr.

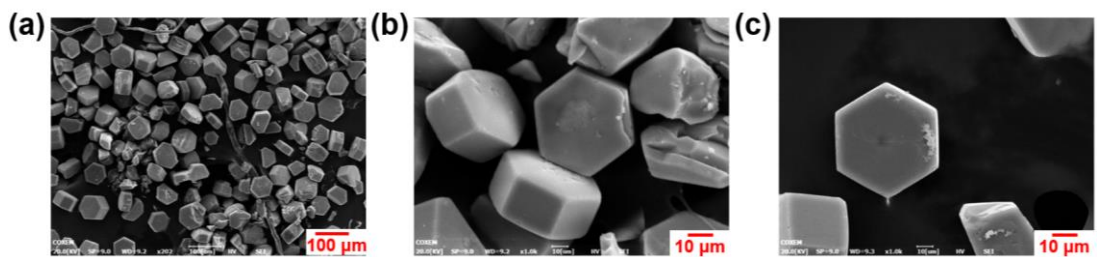

Fig. S34. SEM image of JNU-206-Nd.

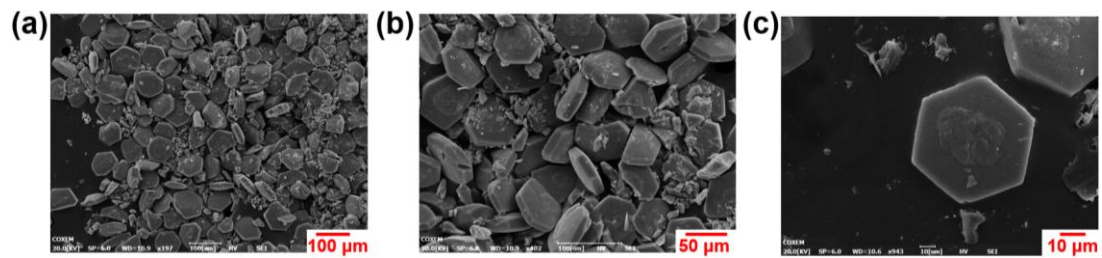

Fig. S35. SEM image of JNU-206-Sm.

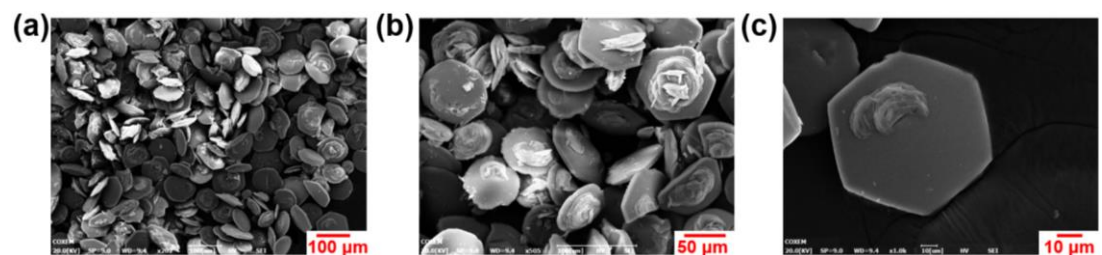

Fig. S36. SEM image of JNU-206-Gd.

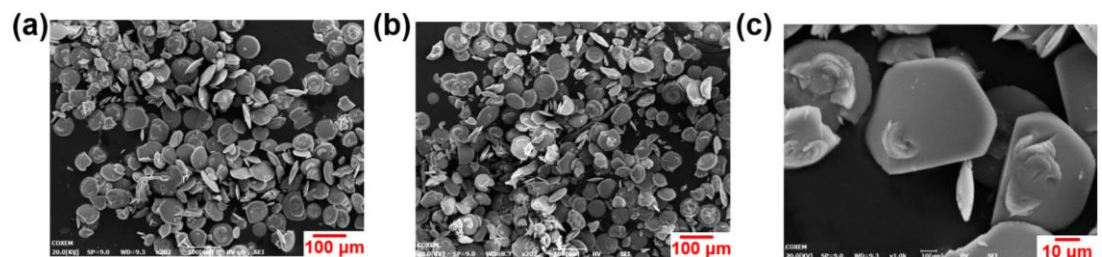

Fig. S37. SEM image of JNU-206-Tb.

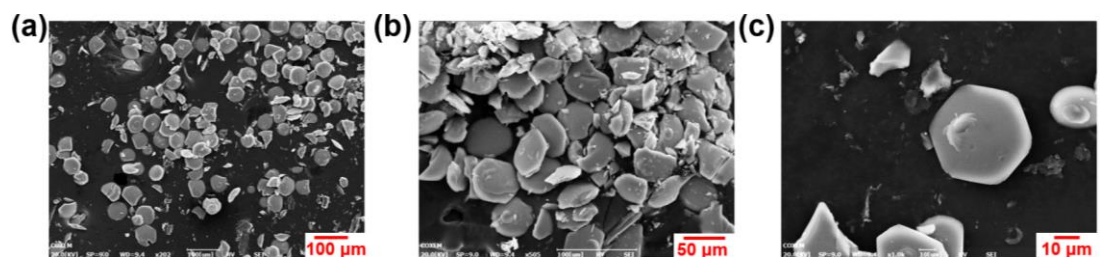

Fig. S38. SEM image of JNU-206-Dy.

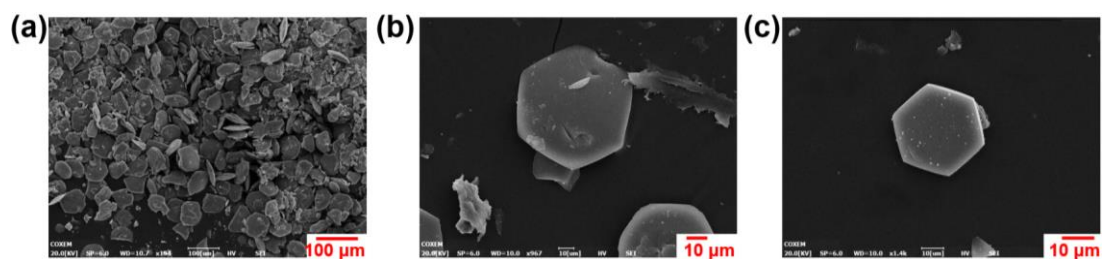

Fig. S39. SEM image of JNU-206-Ho.

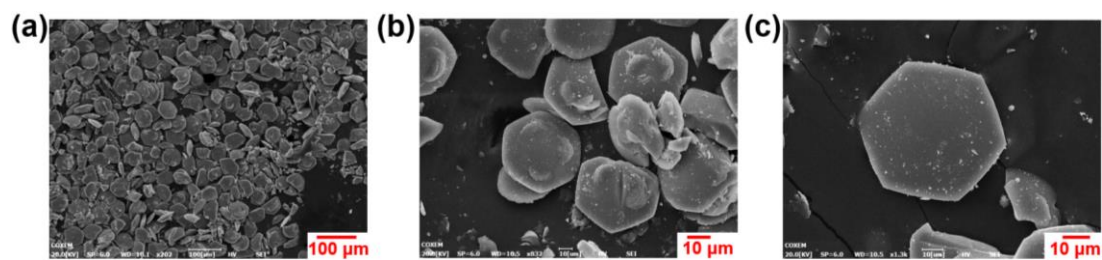

Fig. S40. SEM image of JNU-206-Er.

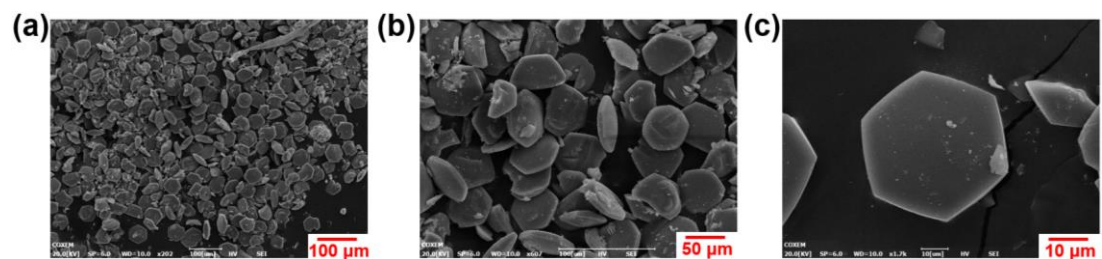

Fig. S41. SEM image of JNU-206-Tm.

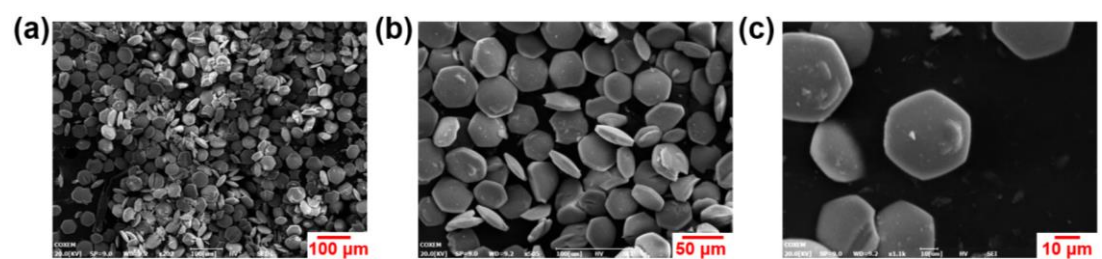

Fig. S42. SEM image of JNU-206-Yb.

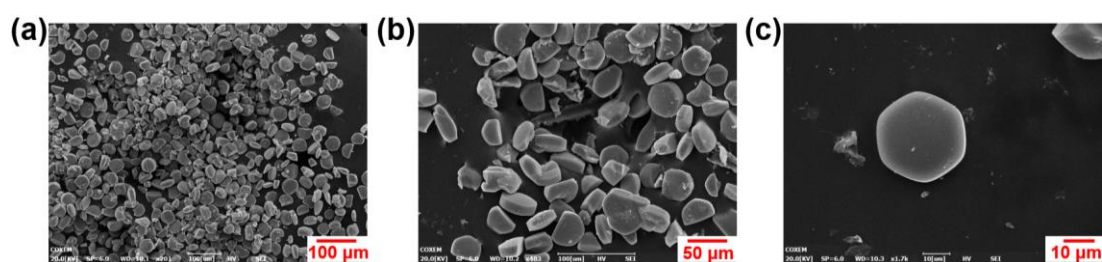

Fig. S43. SEM image of JNU-206-Lu.

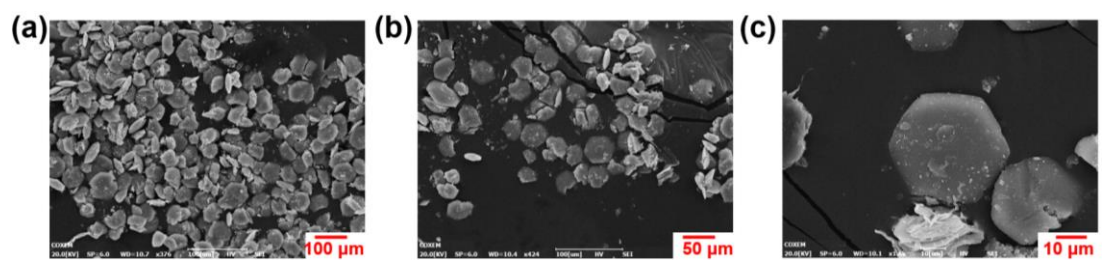

Fig. S44. SEM image of JNU-206-Y.

## 2.5 FT-IR spectra of JNU-206-RE

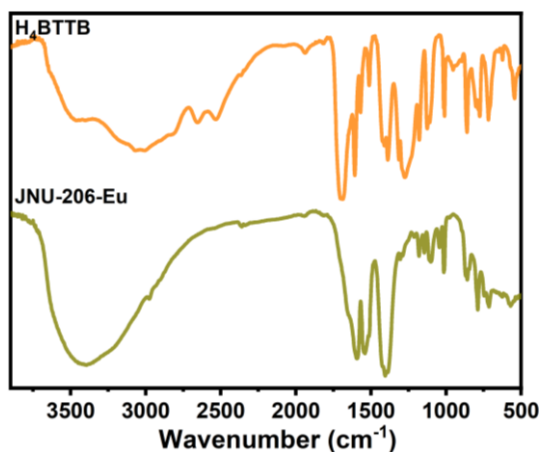

Fig. S45. FT-IR spectra of  $H_4BTTB$  and JNU-206-Eu.

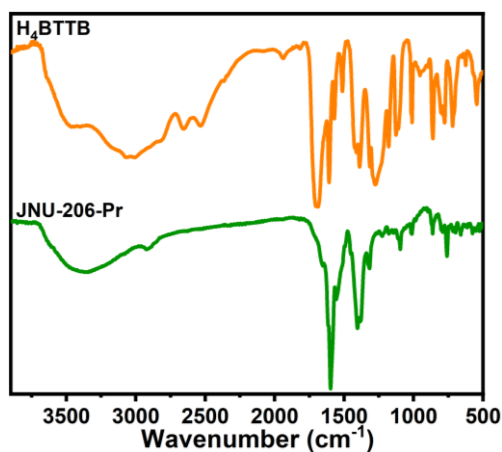

Fig. S46. FT-IR spectra of  $H_4BTTB$  and JNU-206-Pr.

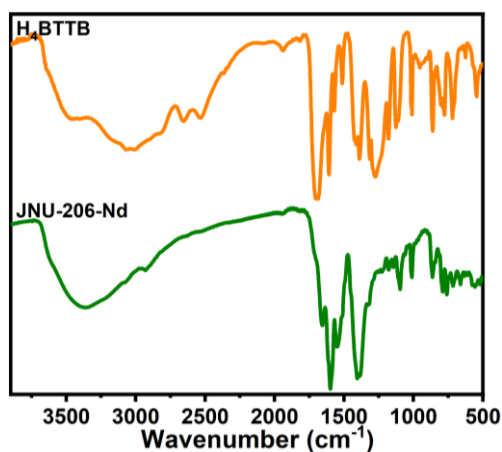

Fig. S47. FT-IR spectra of  $H_4BTTB$  and JNU-206-Nd.

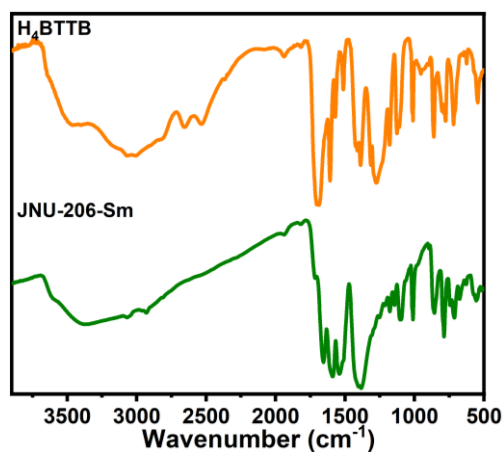

Fig. S48. FT-IR spectra of H<sub>4</sub>BTTB and JNU-206-Sm.

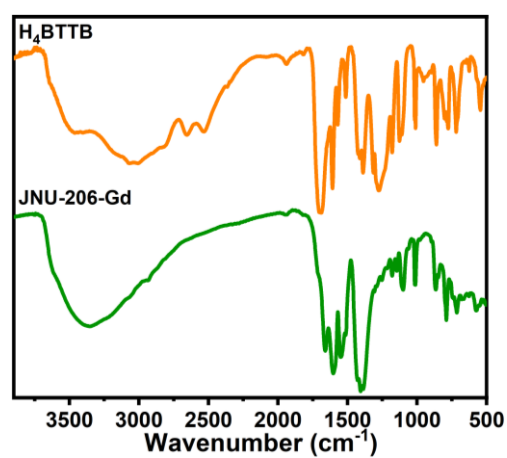

Fig. S49. FT-IR spectra of H<sub>4</sub>BTTB and JNU-206-Gd.

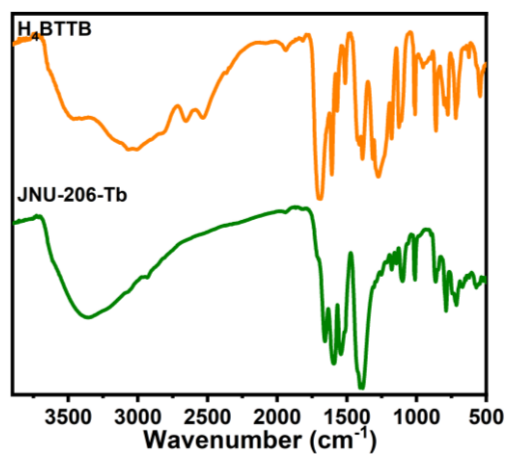

Fig. S50. FT-IR spectra of H<sub>4</sub>BTTB and JNU-206-Tb.

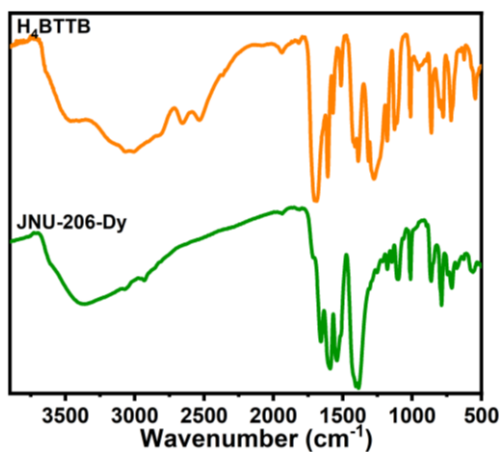

Fig. S51. FT-IR spectra of H<sub>4</sub>BTTB and JNU-206-Dy.

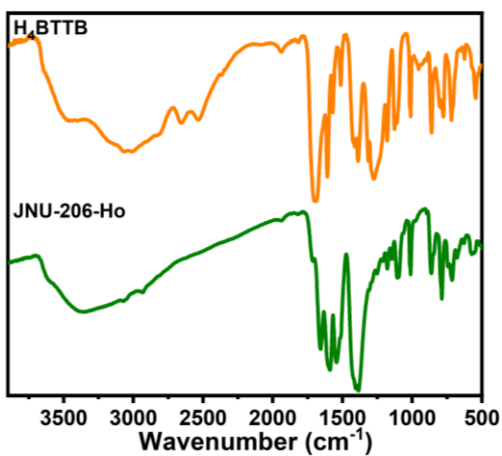

Fig. S52. FT-IR spectra of H<sub>4</sub>BTTB and JNU-206-Ho.

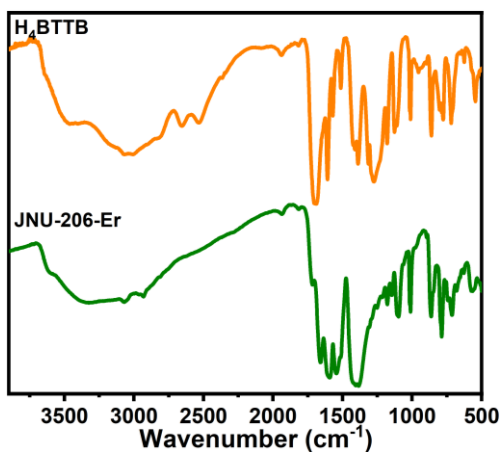

Fig. S53. FT-IR spectra of H<sub>4</sub>BTTB and JNU-206-Er.



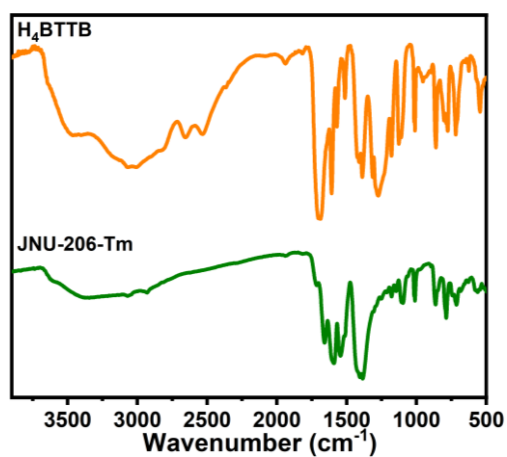

Fig. S54. FT-IR spectra of H<sub>4</sub>BTTB and JNU-206-Tm.

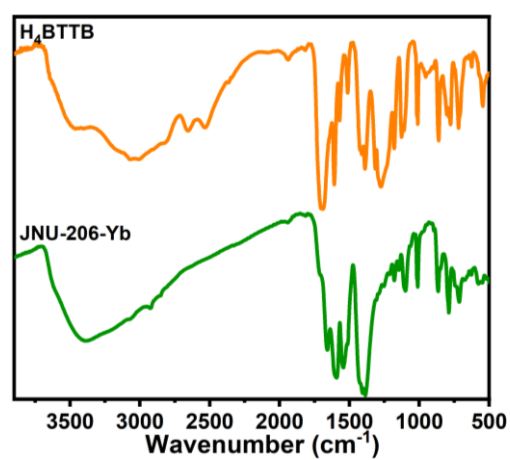

Fig. S55. FT-IR spectra of H<sub>4</sub>BTTB and JNU-206-Yb.

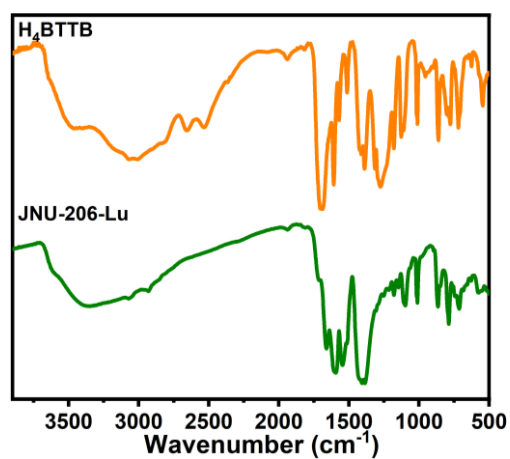

Fig. S56. FT-IR spectra of H<sub>4</sub>BTTB and JNU-206-Lu.

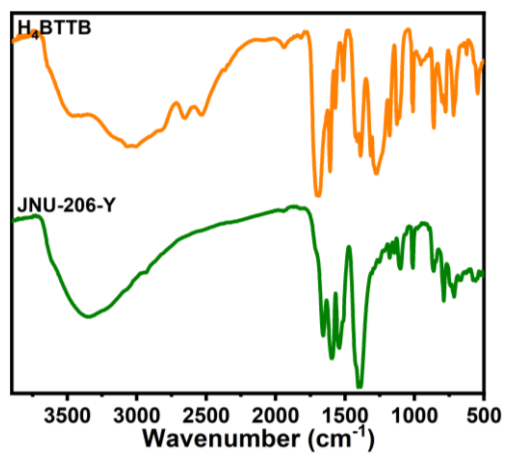

Fig. S57. FT-IR spectra of H<sub>4</sub>BTTB and JNU-206-Y.

## 2.6 Crystallographic data of JNU-205-RE

Table S1. Crystal data and structure refinement for **JNU-205-Eu**.

| MOF                                                                                                    | JNU-205-Eu                                                       |
|--------------------------------------------------------------------------------------------------------|------------------------------------------------------------------|
| CCDC number                                                                                            | 2142283                                                          |
| Empirical formula                                                                                      | C <sub>102</sub> H <sub>54</sub> Eu <sub>9</sub> O <sub>47</sub> |
| Formula weight                                                                                         | 3399.09                                                          |
| Crystal system                                                                                         | trigonal                                                         |
| Space group                                                                                            | <i>P</i> $\bar{3}$ <i>m</i> 1                                    |
| <i>a</i> /Å                                                                                            | 16.5751(3)                                                       |
| <i>b</i> /Å                                                                                            | 16.5751(3)                                                       |
| <i>c</i> /Å                                                                                            | 12.3843(4)                                                       |
| <i>V</i> /Å <sup>3</sup>                                                                               | 5335.01(11)                                                      |
| $\alpha$ /°                                                                                            | 90                                                               |
| $\beta$ /°                                                                                             | 90                                                               |
| $\gamma$ /°                                                                                            | 120                                                              |
| <i>Z</i>                                                                                               | 1                                                                |
| <i>D</i> <sub>c</sub> /g cm <sup>-3</sup>                                                              | 1.058                                                            |
| $\mu$ /mm <sup>-1</sup>                                                                                | 18.997                                                           |
| $\lambda$ /Å                                                                                           | 1.54184                                                          |
| T/K                                                                                                    | 100                                                              |
| Reflections collected                                                                                  | 16321                                                            |
| Independent reflections                                                                                | 3887 [ <i>R</i> <sub>int</sub> = 0.0429]                         |
| Goodness-of-fit on <i>F</i> <sup>2</sup>                                                               | 1.099                                                            |
| <i>R</i> <sub>1</sub> <sup>a</sup> , <i>wR</i> <sub>2</sub> <sup>b</sup> [ <i>I</i> > 2σ ( <i>I</i> )] | <i>R</i> <sub>1</sub> = 0.0729, <i>wR</i> <sub>2</sub> = 0.2022  |
| <i>R</i> <sub>1</sub> <sup>a</sup> , <i>wR</i> <sub>2</sub> <sup>b</sup> (all data)                    | <i>R</i> <sub>1</sub> = 0.0837, <i>wR</i> <sub>2</sub> = 0.2136  |
| Largest diff. peak and hole /e. Å <sup>-3</sup>                                                        | 2.40/-2.56                                                       |

$$^a R_1 = \frac{\sum ||F_o| - |F_c||}{\sum |F_o|}$$

$$^b wR_2 = \left\{ \frac{\sum [w (F_o^2 - F_c^2)^2]}{\sum [w (F_o^2)^2]} \right\}^{1/2}, [F_o > 4\sigma (F_o)]$$

## 2.7 Crystallographic data of JNU-206-RE

Table S2. Crystal data and structure refinement for **JNU-206-Eu**.

| MOF                                                                                                   | JNU-206-Eu                                                                     |
|-------------------------------------------------------------------------------------------------------|--------------------------------------------------------------------------------|
| CCDC number                                                                                           | 2142284                                                                        |
| Empirical formula                                                                                     | C <sub>96</sub> H <sub>48</sub> Eu <sub>9</sub> N <sub>6</sub> O <sub>47</sub> |
| Formula weight                                                                                        | 3405.04                                                                        |
| Crystal system                                                                                        | trigonal                                                                       |
| Space group                                                                                           | <i>P</i> $\bar{3}$ <i>m</i> 1                                                  |
| <i>a</i> /Å                                                                                           | 21.9378(6)                                                                     |
| <i>b</i> /Å                                                                                           | 21.9378(6)                                                                     |
| <i>c</i> /Å                                                                                           | 12.6523(4)                                                                     |
| <i>V</i> /Å <sup>3</sup>                                                                              | 5273.3(3)                                                                      |
| $\alpha$ /°                                                                                           | 90                                                                             |
| $\beta$ /°                                                                                            | 90                                                                             |
| $\gamma$ /°                                                                                           | 120                                                                            |
| <i>Z</i>                                                                                              | 1                                                                              |
| <i>D</i> <sub>C</sub> /g cm <sup>-3</sup>                                                             | 1.072                                                                          |
| $\mu$ /mm <sup>-1</sup>                                                                               | 19.229                                                                         |
| $\lambda$ /Å                                                                                          | 1.54184                                                                        |
| T/K                                                                                                   | 300                                                                            |
| Reflections collected                                                                                 | 16847                                                                          |
| Independent reflections                                                                               | 3913 [ <i>R</i> <sub>int</sub> = 0.0653]                                       |
| Goodness-of-fit on <i>F</i> <sup>2</sup>                                                              | 1.071                                                                          |
| <i>R</i> <sub>1</sub> <sup>a</sup> , <i>wR</i> <sub>2</sub> <sup>b</sup> [ <i>I</i> > 2σ( <i>I</i> )] | <i>R</i> <sub>1</sub> = 0.0636, <i>wR</i> <sub>2</sub> = 0.1726                |
| <i>R</i> <sub>1</sub> <sup>a</sup> , <i>wR</i> <sub>2</sub> <sup>b</sup> (all data)                   | <i>R</i> <sub>1</sub> = 0.0737, <i>wR</i> <sub>2</sub> = 0.1828                |
| Largest diff. peak and hole /e. Å <sup>-3</sup>                                                       | 1.47/-1.57                                                                     |

$$^a R_1 = \Sigma ||F_o| - |F_c|| / \Sigma |F_o|$$

$$^b wR_2 = \{ \Sigma [w (F_o^2 - F_c^2)^2] / \Sigma [w (F_o^2)^2] \}^{1/2}, [F_o > 4\sigma (F_o)]$$

Table S3. Crystal data and structure refinement for **JNU-206-Pr**.

| MOF                                                                                                   | JNU-206-Pr                                                                       |
|-------------------------------------------------------------------------------------------------------|----------------------------------------------------------------------------------|
| CCDC number                                                                                           | 2142285                                                                          |
| Empirical formula                                                                                     | C <sub>96</sub> H <sub>48</sub> N <sub>6</sub> O <sub>45.5</sub> Pr <sub>9</sub> |
| Formula weight                                                                                        | 3281.72                                                                          |
| Crystal system                                                                                        | hexagonal                                                                        |
| Space group                                                                                           | <i>P6<sub>3</sub>/mmc</i>                                                        |
| <i>a</i> /Å                                                                                           | 21.99640(10)                                                                     |
| <i>b</i> /Å                                                                                           | 21.99640(10)                                                                     |
| <i>c</i> /Å                                                                                           | 26.1243(2)                                                                       |
| <i>V</i> /Å <sup>3</sup>                                                                              | 10946.58(13)                                                                     |
| $\alpha$ /°                                                                                           | 90                                                                               |
| $\beta$ /°                                                                                            | 90                                                                               |
| $\gamma$ /°                                                                                           | 120                                                                              |
| <i>Z</i>                                                                                              | 2                                                                                |
| <i>D<sub>C</sub></i> /g cm <sup>-3</sup>                                                              | 0.996                                                                            |
| $\mu$ /mm <sup>-1</sup>                                                                               | 15.426                                                                           |
| $\lambda$ /Å                                                                                          | 1.54184                                                                          |
| T/K                                                                                                   | 300                                                                              |
| Reflections collected                                                                                 | 43387                                                                            |
| Independent reflections                                                                               | 4175 [ <i>R</i> <sub>int</sub> = 0.0479]                                         |
| Goodness-of-fit on <i>F</i> <sup>2</sup>                                                              | 1.120                                                                            |
| <i>R</i> <sub>1</sub> <sup>a</sup> , <i>wR</i> <sub>2</sub> <sup>b</sup> [ <i>I</i> > 2σ( <i>I</i> )] | <i>R</i> <sub>1</sub> = 0.0560, <i>wR</i> <sub>2</sub> = 0.1589                  |
| <i>R</i> <sub>1</sub> <sup>a</sup> , <i>wR</i> <sub>2</sub> <sup>b</sup> (all data)                   | <i>R</i> <sub>1</sub> = 0.0586, <i>wR</i> <sub>2</sub> = 0.1631                  |
| Largest diff. peak and hole /e. Å <sup>-3</sup>                                                       | 3.16/-1.17                                                                       |

$$^a R_1 = \frac{\sum ||F_o| - |F_c||}{\sum |F_o|}$$

$$^b wR_2 = \left\{ \frac{\sum [w (F_o^2 - F_c^2)^2]}{\sum [w (F_o^2)^2]} \right\}^{1/2}, [F_o > 4\sigma (F_o)]$$

Table S4. Crystal data and structure refinement for **JNU-206-Nd**.

| MOF                                                                                                   | JNU-206-Nd                                                                        |
|-------------------------------------------------------------------------------------------------------|-----------------------------------------------------------------------------------|
| CCDC number                                                                                           | 2142286                                                                           |
| Empirical formula                                                                                     | C <sub>192</sub> H <sub>96</sub> N <sub>12</sub> Nd <sub>18</sub> O <sub>89</sub> |
| Formula weight                                                                                        | 6591.12                                                                           |
| Crystal system                                                                                        | hexagonal                                                                         |
| Space group                                                                                           | <i>P6<sub>3</sub>/mmc</i>                                                         |
| <i>a</i> /Å                                                                                           | 22.0814(2)                                                                        |
| <i>b</i> /Å                                                                                           | 22.0814(2)                                                                        |
| <i>c</i> /Å                                                                                           | 25.5403(3)                                                                        |
| <i>V</i> /Å <sup>3</sup>                                                                              | 10784.7(2)                                                                        |
| <i>α</i> /°                                                                                           | 90                                                                                |
| <i>β</i> /°                                                                                           | 90                                                                                |
| <i>γ</i> /°                                                                                           | 120                                                                               |
| <i>Z</i>                                                                                              | 1                                                                                 |
| <i>D<sub>C</sub></i> /g cm <sup>-3</sup>                                                              | 1.015                                                                             |
| <i>μ</i> /mm <sup>-1</sup>                                                                            | 16.587                                                                            |
| <i>λ</i> /Å                                                                                           | 1.54184                                                                           |
| T/K                                                                                                   | 300                                                                               |
| Reflections collected                                                                                 | 41969                                                                             |
| Independent reflections                                                                               | 4120 [ <i>R</i> <sub>int</sub> = 0.04441]                                         |
| Goodness-of-fit on <i>F</i> <sup>2</sup>                                                              | 1.059                                                                             |
| <i>R</i> <sub>1</sub> <sup>a</sup> , <i>wR</i> <sub>2</sub> <sup>b</sup> [ <i>I</i> > 2σ( <i>I</i> )] | <i>R</i> <sub>1</sub> = 0.0953, <i>wR</i> <sub>2</sub> = 0.2348                   |
| <i>R</i> <sub>1</sub> <sup>a</sup> , <i>wR</i> <sub>2</sub> <sup>b</sup> (all data)                   | <i>R</i> <sub>1</sub> = 0.1006, <i>wR</i> <sub>2</sub> = 0.2423                   |
| Largest diff. peak and hole /e. Å <sup>-3</sup>                                                       | 4.28/-1.16                                                                        |

$$^a R_1 = \frac{\sum ||F_o| - |F_c||}{\sum |F_o|}$$

$$^b wR_2 = \left\{ \frac{\sum [w (F_o^2 - F_c^2)^2]}{\sum [w (F_o^2)^2]} \right\}^{1/2}, [F_o > 4\sigma (F_o)]$$

Table S5. Crystal data and structure refinement for **JNU-206-Sm**.

| MOF                                                                                                     | <b>JNU-206-Sm</b>                                                              |
|---------------------------------------------------------------------------------------------------------|--------------------------------------------------------------------------------|
| CCDC number                                                                                             | 2142287                                                                        |
| Empirical formula                                                                                       | C <sub>96</sub> H <sub>48</sub> N <sub>6</sub> O <sub>47</sub> Sm <sub>9</sub> |
| Formula weight                                                                                          | 3390.55                                                                        |
| Crystal system                                                                                          | trigonal                                                                       |
| Space group                                                                                             | <i>P</i> $\bar{3}$ <i>m</i> 1                                                  |
| <i>a</i> /Å                                                                                             | 21.6027(3)                                                                     |
| <i>b</i> /Å                                                                                             | 21.6027(3)                                                                     |
| <i>c</i> /Å                                                                                             | 12.4503(2)                                                                     |
| <i>V</i> /Å <sup>3</sup>                                                                                | 5031.83(16)                                                                    |
| $\alpha$ /°                                                                                             | 90                                                                             |
| $\beta$ /°                                                                                              | 90                                                                             |
| $\gamma$ /°                                                                                             | 120                                                                            |
| <i>Z</i>                                                                                                | 1                                                                              |
| <i>D</i> <sub>C</sub> /g cm <sup>-3</sup>                                                               | 1.119                                                                          |
| $\mu$ /mm <sup>-1</sup>                                                                                 | 19.794                                                                         |
| $\lambda$ /Å                                                                                            | 1.54184                                                                        |
| T/K                                                                                                     | 300                                                                            |
| Reflections collected                                                                                   | 17949                                                                          |
| Independent reflections                                                                                 | 3700 [ <i>R</i> <sub>int</sub> = 0.0420]                                       |
| Goodness-of-fit on <i>F</i> <sup>2</sup>                                                                | 1.091                                                                          |
| <i>R</i> <sub>1</sub> <sup>a</sup> , <i>wR</i> <sub>2</sub> <sup>b</sup> [ <i>I</i> > 2σ ( <i>I</i> ) ] | <i>R</i> <sub>1</sub> = 0.0495, <i>wR</i> <sub>2</sub> = 0.1367                |
| <i>R</i> <sub>1</sub> <sup>a</sup> , <i>wR</i> <sub>2</sub> <sup>b</sup> (all data)                     | <i>R</i> <sub>1</sub> = 0.0555, <i>wR</i> <sub>2</sub> = 0.1430                |
| Largest diff. peak and hole /e. Å <sup>-3</sup>                                                         | 1.82/-1.39                                                                     |

$$^a R_1 = \frac{\sum ||F_o| - |F_c||}{\sum |F_o|}$$

$$^b wR_2 = \left\{ \frac{\sum [w (F_o^2 - F_c^2)^2]}{\sum [w (F_o^2)^2]} \right\}^{1/2}, [F_o > 4\sigma (F_o)]$$

Table S6. Crystal data and structure refinement for **JNU-206-Gd**.

| MOF                                               | <b>JNU-206-Gd</b>                                                              |
|---------------------------------------------------|--------------------------------------------------------------------------------|
| CCDC number                                       | 2142288                                                                        |
| Empirical formula                                 | C <sub>96</sub> H <sub>48</sub> Gd <sub>9</sub> N <sub>6</sub> O <sub>47</sub> |
| Formula weight                                    | 3452.65                                                                        |
| Crystal system                                    | trigonal                                                                       |
| Space group                                       | $P\bar{3}m1$                                                                   |
| $a/\text{\AA}$                                    | 21.8905(17)                                                                    |
| $b/\text{\AA}$                                    | 21.8905(17)                                                                    |
| $c/\text{\AA}$                                    | 12.6457(8)                                                                     |
| $V/\text{\AA}^3$                                  | 5247.9(9)                                                                      |
| $\alpha/^\circ$                                   | 90                                                                             |
| $\beta/^\circ$                                    | 90                                                                             |
| $\gamma/^\circ$                                   | 120                                                                            |
| Z                                                 | 1                                                                              |
| $D_C / \text{g cm}^{-3}$                          | 1.092                                                                          |
| $\mu / \text{mm}^{-1}$                            | 18.464                                                                         |
| $\lambda / \text{\AA}$                            | 1.54184                                                                        |
| T/K                                               | 300                                                                            |
| Reflections collected                             | 17623                                                                          |
| Independent reflections                           | 3882 [ $R_{\text{int}} = 0.0614$ ]                                             |
| Goodness-of-fit on $F^2$                          | 1.128                                                                          |
| $R_1^a, wR_2^b$ [ $I > 2\sigma(I)$ ]              | $R_1 = 0.0631, wR_2 = 0.1833$                                                  |
| $R_1^a, wR_2^b$ (all data)                        | $R_1 = 0.0709, wR_2 = 0.1946$                                                  |
| Largest diff. peak and hole /e. $\text{\AA}^{-3}$ | 1.24/-1.37                                                                     |

$$^a R_1 = \frac{\sum ||F_o| - |F_c||}{\sum |F_o|}$$

$$^b wR_2 = \left\{ \frac{\sum [w(F_o^2 - F_c^2)^2]}{\sum [w(F_o^2)^2]} \right\}^{1/2}, [F_o > 4\sigma(F_o)]$$



Table S7. Crystal data and structure refinement for **JNU-206-Tb**.

| MOF                                               | JNU-206-Tb                                                                     |
|---------------------------------------------------|--------------------------------------------------------------------------------|
| CCDC number                                       | 2142289                                                                        |
| Empirical formula                                 | C <sub>96</sub> H <sub>48</sub> N <sub>6</sub> O <sub>47</sub> Tb <sub>9</sub> |
| Formula weight                                    | 3467.68                                                                        |
| Crystal system                                    | trigonal                                                                       |
| Space group                                       | $P\bar{3}m1$                                                                   |
| $a/\text{\AA}$                                    | 21.8367(8)                                                                     |
| $b/\text{\AA}$                                    | 21.8367(8)                                                                     |
| $c/\text{\AA}$                                    | 12.6410(4)                                                                     |
| $V/\text{\AA}^3$                                  | 5220.2(4)                                                                      |
| $\alpha/^\circ$                                   | 90                                                                             |
| $\beta/^\circ$                                    | 90                                                                             |
| $\gamma/^\circ$                                   | 120                                                                            |
| Z                                                 | 1                                                                              |
| $D_C / \text{g cm}^{-3}$                          | 1.103                                                                          |
| $\mu / \text{mm}^{-1}$                            | 15.062                                                                         |
| $\lambda / \text{\AA}$                            | 1.54184                                                                        |
| T/K                                               | 300                                                                            |
| Reflections collected                             | 278                                                                            |
| Independent reflections                           | 3763 [ $R_{\text{int}} = 0.0725$ ]                                             |
| Goodness-of-fit on $F^2$                          | 1.062                                                                          |
| $R_1^a, wR_2^b$ [ $I > 2\sigma(I)$ ]              | $R_1 = 0.0581, wR_2 = 0.1621$                                                  |
| $R_1^a, wR_2^b$ (all data)                        | $R_1 = 0.0690, wR_2 = 0.1708$                                                  |
| Largest diff. peak and hole /e. $\text{\AA}^{-3}$ | 1.62/-1.27                                                                     |

$$^a R_1 = \frac{\sum ||F_o| - |F_c||}{\sum |F_o|}$$

$$^b wR_2 = \left\{ \frac{\sum [w(F_o^2 - F_c^2)^2]}{\sum [w(F_o^2)^2]} \right\}^{1/2}, [F_o > 4\sigma(F_o)]$$

Table S8. Crystal data and structure refinement for **JNU-206-Dy**.

| MOF                                               | JNU-206-Dy                                                                     |
|---------------------------------------------------|--------------------------------------------------------------------------------|
| CCDC number                                       | 2142290                                                                        |
| Empirical formula                                 | C <sub>96</sub> H <sub>48</sub> Dy <sub>9</sub> N <sub>6</sub> O <sub>47</sub> |
| Formula weight                                    | 3500.04                                                                        |
| Crystal system                                    | trigonal                                                                       |
| Space group                                       | $P\bar{3}m1$                                                                   |
| $a/\text{\AA}$                                    | 21.7717(2)                                                                     |
| $b/\text{\AA}$                                    | 21.7717(2)                                                                     |
| $c/\text{\AA}$                                    | 12.57240(10)                                                                   |
| $V/\text{\AA}^3$                                  | 5160.99(10)                                                                    |
| $\alpha/^\circ$                                   | 90                                                                             |
| $\beta/^\circ$                                    | 90                                                                             |
| $\gamma/^\circ$                                   | 120                                                                            |
| Z                                                 | 1                                                                              |
| $D_C / \text{g cm}^{-3}$                          | 1.126                                                                          |
| $\mu / \text{mm}^{-1}$                            | 17.502                                                                         |
| $\lambda / \text{\AA}$                            | 1.54184                                                                        |
| T/K                                               | 300                                                                            |
| Reflections collected                             | 15878                                                                          |
| Independent reflections                           | 3878 [ $R_{\text{int}} = 0.0289$ ]                                             |
| Goodness-of-fit on $F^2$                          | 1.081                                                                          |
| $R_1^a, wR_2^b$ [ $I > 2\sigma(I)$ ]              | $R_1 = 0.0550, wR_2 = 0.1581$                                                  |
| $R_1^a, wR_2^b$ (all data)                        | $R_1 = 0.0586, wR_2 = 0.1621$                                                  |
| Largest diff. peak and hole /e. $\text{\AA}^{-3}$ | 1.70/-2.17                                                                     |

$$^a R_1 = \frac{\sum ||F_o| - |F_c||}{\sum |F_o|}$$

$$^b wR_2 = \left\{ \frac{\sum [w(F_o^2 - F_c^2)^2]}{\sum [w(F_o^2)^2]} \right\}^{1/2}, [F_o > 4\sigma(F_o)]$$

Table S9. Crystal data and structure refinement for **JNU-206-Ho**.

| MOF                                                                                                   | <b>JNU-206-Ho</b>                                                              |
|-------------------------------------------------------------------------------------------------------|--------------------------------------------------------------------------------|
| CCDC number                                                                                           | 2142291                                                                        |
| Empirical formula                                                                                     | C <sub>96</sub> H <sub>42</sub> Ho <sub>9</sub> N <sub>6</sub> O <sub>44</sub> |
| Formula weight                                                                                        | 3467.72                                                                        |
| Crystal system                                                                                        | trigonal                                                                       |
| Space group                                                                                           | <i>P</i> $\bar{3}m1$                                                           |
| <i>a</i> /Å                                                                                           | 22.0118(12)                                                                    |
| <i>b</i> /Å                                                                                           | 22.0118(12)                                                                    |
| <i>c</i> /Å                                                                                           | 12.3202(8)                                                                     |
| <i>V</i> /Å <sup>3</sup>                                                                              | 5169.6(7)                                                                      |
| $\alpha$ /°                                                                                           | 90                                                                             |
| $\beta$ /°                                                                                            | 90                                                                             |
| $\gamma$ /°                                                                                           | 120                                                                            |
| <i>Z</i>                                                                                              | 1                                                                              |
| <i>D</i> <sub>C</sub> /g cm <sup>-3</sup>                                                             | 1.114                                                                          |
| $\mu$ /mm <sup>-1</sup>                                                                               | 6.487                                                                          |
| $\lambda$ /Å                                                                                          | 1.54184                                                                        |
| T/K                                                                                                   | 300                                                                            |
| Reflections collected                                                                                 | 16302                                                                          |
| Independent reflections                                                                               | 3724 [ <i>R</i> <sub>int</sub> = 0.0825]                                       |
| Goodness-of-fit on <i>F</i> <sup>2</sup>                                                              | 1.067                                                                          |
| <i>R</i> <sub>1</sub> <sup>a</sup> , <i>wR</i> <sub>2</sub> <sup>b</sup> [ <i>I</i> > 2σ( <i>I</i> )] | <i>R</i> <sub>1</sub> = 0.0558, <i>wR</i> <sub>2</sub> = 0.1543                |
| <i>R</i> <sub>1</sub> <sup>a</sup> , <i>wR</i> <sub>2</sub> <sup>b</sup> (all data)                   | <i>R</i> <sub>1</sub> = 0.0699, <i>wR</i> <sub>2</sub> = 0.1648                |
| Largest diff. peak and hole /e. Å <sup>-3</sup>                                                       | 1.45/-1.14                                                                     |

$$^a R_1 = \frac{\sum ||F_o| - |F_c||}{\sum |F_o|}$$

$$^b wR_2 = \left\{ \frac{\sum [w (F_o^2 - F_c^2)^2]}{\sum [w (F_o^2)^2]} \right\}^{1/2}, [F_o > 4\sigma (F_o)]$$

Table S10. Crystal data and structure refinement for **JNU-206-Er**.

| MOF                                               | JNU-206-Er                                                                     |
|---------------------------------------------------|--------------------------------------------------------------------------------|
| CCDC number                                       | 2142292                                                                        |
| Empirical formula                                 | C <sub>96</sub> H <sub>48</sub> Er <sub>9</sub> N <sub>6</sub> O <sub>47</sub> |
| Formula weight                                    | 3542.74                                                                        |
| Crystal system                                    | trigonal                                                                       |
| Space group                                       | $P\bar{3}m1$                                                                   |
| $a/\text{\AA}$                                    | 21.762(3)                                                                      |
| $b/\text{\AA}$                                    | 21.762(3)                                                                      |
| $c/\text{\AA}$                                    | 12.3941(12)                                                                    |
| $V/\text{\AA}^3$                                  | 5083.1(13)                                                                     |
| $\alpha/^\circ$                                   | 90                                                                             |
| $\beta/^\circ$                                    | 90                                                                             |
| $\gamma/^\circ$                                   | 120                                                                            |
| Z                                                 | 1                                                                              |
| $D_C / \text{g cm}^{-3}$                          | 1.157                                                                          |
| $\mu / \text{mm}^{-1}$                            | 6.970                                                                          |
| $\lambda / \text{\AA}$                            | 1.54184                                                                        |
| T/K                                               | 300                                                                            |
| Reflections collected                             | 15289                                                                          |
| Independent reflections                           | 3732 [ $R_{\text{int}} = 0.0765$ ]                                             |
| Goodness-of-fit on $F^2$                          | 1.095                                                                          |
| $R_1^a, wR_2^b$ [ $I > 2\sigma(I)$ ]              | $R_1 = 0.0729, wR_2 = 0.1992$                                                  |
| $R_1^a, wR_2^b$ (all data)                        | $R_1 = 0.0870, wR_2 = 0.2146$                                                  |
| Largest diff. peak and hole /e. $\text{\AA}^{-3}$ | 2.03/-4.08                                                                     |

$$^a R_1 = \frac{\sum ||F_o| - |F_c||}{\sum |F_o|}$$

$$^b wR_2 = \left\{ \frac{\sum [w (F_o^2 - F_c^2)^2]}{\sum [w (F_o^2)^2]} \right\}^{1/2}, [F_o > 4\sigma(F_o)]$$

Table S11. Crystal data and structure refinement for **JNU-206-Tm**.

| MOF                                               | JNU-206-Tm                                                                     |
|---------------------------------------------------|--------------------------------------------------------------------------------|
| CCDC number                                       | 2142293                                                                        |
| Empirical formula                                 | C <sub>96</sub> H <sub>48</sub> N <sub>6</sub> O <sub>47</sub> Tm <sub>9</sub> |
| Formula weight                                    | 3557.77                                                                        |
| Crystal system                                    | trigonal                                                                       |
| Space group                                       | $P\bar{3}m1$                                                                   |
| $a/\text{\AA}$                                    | 21.731(2)                                                                      |
| $b/\text{\AA}$                                    | 21.731(2)                                                                      |
| $c/\text{\AA}$                                    | 12.4178(12)                                                                    |
| $V/\text{\AA}^3$                                  | 5078.6(11)                                                                     |
| $\alpha/^\circ$                                   | 90                                                                             |
| $\beta/^\circ$                                    | 90                                                                             |
| $\gamma/^\circ$                                   | 120                                                                            |
| $Z$                                               | 1                                                                              |
| $D_C / \text{g cm}^{-3}$                          | 1.163                                                                          |
| $\mu / \text{mm}^{-1}$                            | 7.437                                                                          |
| $\lambda / \text{\AA}$                            | 1.54184                                                                        |
| T/K                                               | 300                                                                            |
| Reflections collected                             | 12437                                                                          |
| Independent reflections                           | 3677 [ $R_{\text{int}} = 0.1724$ ]                                             |
| Goodness-of-fit on $F^2$                          | 0.114                                                                          |
| $R_1^a, wR_2^b$ [ $I > 2\sigma(I)$ ]              | $R_1 = 0.1202, wR_2 = 0.2777$                                                  |
| $R_1^a, wR_2^b$ (all data)                        | $R_1 = 0.1683, wR_2 = 0.3353$                                                  |
| Largest diff. peak and hole /e. $\text{\AA}^{-3}$ | 4.33/-3.17                                                                     |

$$^a R_1 = \frac{\sum ||F_o| - |F_c||}{\sum |F_o|}$$

$$^b wR_2 = \left\{ \frac{\sum [w (F_o^2 - F_c^2)^2]}{\sum [w (F_o^2)^2]} \right\}^{1/2}, [F_o > 4\sigma(F_o)]$$

Table S12. Crystal data and structure refinement for **JNU-206-Yb**.

| MOF                                  | <b>JNU-206-Yb</b>                                                              |
|--------------------------------------|--------------------------------------------------------------------------------|
| CCDC number                          | 2142294                                                                        |
| Empirical formula                    | C <sub>96</sub> H <sub>60</sub> N <sub>6</sub> O <sub>44</sub> Yb <sub>9</sub> |
| Formula weight                       | 3558.86                                                                        |
| Crystal system                       | trigonal                                                                       |
| Space group                          | $P\bar{3}m1$                                                                   |
| $a/\text{\AA}$                       | 21.6417(3)                                                                     |
| $b/\text{\AA}$                       | 21.6417(3)                                                                     |
| $c/\text{\AA}$                       | 12.4403(2)                                                                     |
| $V/\text{\AA}^3$                     | 5045.96(16)                                                                    |
| $\alpha/^\circ$                      | 90                                                                             |
| $\beta/^\circ$                       | 90                                                                             |
| $\gamma/^\circ$                      | 120                                                                            |
| $Z$                                  | 1                                                                              |
| $D_C / \text{g cm}^{-3}$             | 1.171                                                                          |
| $\mu / \text{mm}^{-1}$               | 7.770                                                                          |
| $\lambda / \text{\AA}$               | 1.54184                                                                        |
| T/K                                  | 300                                                                            |
| Reflections collected                | 16044                                                                          |
| Independent reflections              | 3710 [Rint = 0.0426]                                                           |
| Goodness-of-fit on $F^2$             | 1.087                                                                          |
| $R_1^a, wR_2^b$ [ $I > 2\sigma(I)$ ] | $R_1 = 0.0554, wR_2 = 0.1519$                                                  |
| $R_1^a, wR_2^b$ (all data)           | $R_1 = 0.0610, wR_2 = 0.1578$                                                  |

$$^a R_1 = \frac{\sum ||F_o| - |F_c||}{\sum |F_o|}$$

$$^b wR_2 = \left\{ \frac{\sum [w (F_o^2 - F_c^2)^2]}{\sum [w (F_o^2)^2]} \right\}^{1/2}, [F_o > 4\sigma(F_o)]$$

Table S13. Crystal data and structure refinement for **JNU-206-Lu**.

| MOF                                                                                                                 | JNU-206-Lu                                                                     |
|---------------------------------------------------------------------------------------------------------------------|--------------------------------------------------------------------------------|
| CCDC number                                                                                                         | 2142295                                                                        |
| Empirical formula                                                                                                   | C <sub>96</sub> H <sub>48</sub> Lu <sub>9</sub> N <sub>6</sub> O <sub>47</sub> |
| Formula weight                                                                                                      | 3612.13                                                                        |
| Crystal system                                                                                                      | trigonal                                                                       |
| Space group                                                                                                         | <i>P</i> $\bar{3}$ <i>m</i> 1                                                  |
| <i>a</i> /Å                                                                                                         | 21.6440(2)                                                                     |
| <i>b</i> /Å                                                                                                         | 21.6440(2)                                                                     |
| <i>c</i> /Å                                                                                                         | 12.41340(10)                                                                   |
| <i>V</i> /Å <sup>3</sup>                                                                                            | 5036.12(10)                                                                    |
| <i>α</i> /°                                                                                                         | 90                                                                             |
| <i>β</i> /°                                                                                                         | 90                                                                             |
| <i>γ</i> /°                                                                                                         | 120                                                                            |
| <i>Z</i>                                                                                                            | 1                                                                              |
| <i>D</i> <sub>C</sub> /g cm <sup>-3</sup>                                                                           | 1.191                                                                          |
| <i>μ</i> /mm <sup>-1</sup>                                                                                          | 8.518                                                                          |
| <i>λ</i> /Å                                                                                                         | 1.54184                                                                        |
| T/K                                                                                                                 | 300                                                                            |
| Reflections collected                                                                                               | 16865                                                                          |
| Independent reflections                                                                                             | 3733 [ <i>R</i> <sub>int</sub> = 0.0387]                                       |
| Goodness-of-fit on <i>F</i> <sup>2</sup>                                                                            | 1.096                                                                          |
| <i>R</i> <sub>1</sub> <sup><i>a</i></sup> , <i>wR</i> <sub>2</sub> <sup><i>b</i></sup> [ <i>I</i> > 2σ( <i>I</i> )] | <i>R</i> <sub>1</sub> = 0.0413, <i>wR</i> <sub>2</sub> = 0.1144                |
| <i>R</i> <sub>1</sub> <sup><i>a</i></sup> , <i>wR</i> <sub>2</sub> <sup><i>b</i></sup> (all data)                   | <i>R</i> <sub>1</sub> = 0.0465, <i>wR</i> <sub>2</sub> = 0.1181                |
| Largest diff. peak and hole /e. Å <sup>-3</sup>                                                                     | 2.21/-1.75                                                                     |

$$^a R_1 = \frac{\sum ||F_o| - |F_c||}{\sum |F_o|}$$

$$^b wR_2 = \left\{ \frac{\sum [w (F_o^2 - F_c^2)^2]}{\sum [w (F_o^2)^2]} \right\}^{1/2}, [F_o > 4\sigma(F_o)]$$

Table S14. Crystal data and structure refinement for **JNU-206-Y**.

| MOF                                               | <b>JNU-206-Y</b>                   |
|---------------------------------------------------|------------------------------------|
| CCDC number                                       | 2142296                            |
| Empirical formula                                 | $C_{96}H_{48}N_6O_{47}Y_9$         |
| Formula weight                                    | 2837.59                            |
| Crystal system                                    | trigonal                           |
| Space group                                       | $P\bar{3}m1$                       |
| $a/\text{\AA}$                                    | 21.7883(6)                         |
| $b/\text{\AA}$                                    | 21.7883(6)                         |
| $c/\text{\AA}$                                    | 12.4902(4)                         |
| $V/\text{\AA}^3$                                  | 5135.1(3)                          |
| $\alpha/^\circ$                                   | 90                                 |
| $\beta/^\circ$                                    | 90                                 |
| $\gamma/^\circ$                                   | 120                                |
| $Z$                                               | 1                                  |
| $D_C / \text{g cm}^{-3}$                          | 0.918                              |
| $\mu / \text{mm}^{-1}$                            | 3.674                              |
| $\lambda / \text{\AA}$                            | 1.54184                            |
| T/K                                               | 300                                |
| Reflections collected                             | 16976                              |
| Independent reflections                           | 3797 [ $R_{\text{int}} = 0.0506$ ] |
| Goodness-of-fit on $F^2$                          | 1.099                              |
| $R_1^a, wR_2^b$ [ $I > 2\sigma(I)$ ]              | $R_1 = 0.0737, wR_2 = 0.2019$      |
| $R_1^a, wR_2^b$ (all data)                        | $R_1 = 0.0814, wR_2 = 0.2101$      |
| Largest diff. peak and hole /e. $\text{\AA}^{-3}$ | 2.62/-1.95                         |

$$^a R_1 = \frac{\sum ||F_o| - |F_c||}{\sum |F_o|}$$

$$^b wR_2 = \left\{ \frac{\sum [w(F_o^2 - F_c^2)^2]}{\sum [w(F_o^2)^2]} \right\}^{1/2}, [F_o > 4\sigma(F_o)]$$



## 2.8 TGA of JNU-205-RE and JNU-206-RE

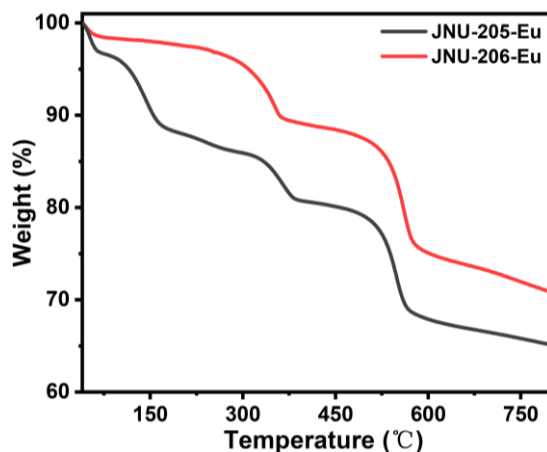

Fig. S58. TGA of JNU-205-Eu and JNU-206-Eu.

## 2.9 PXRD patterns of JNU-205-RE and JNU-206-RE

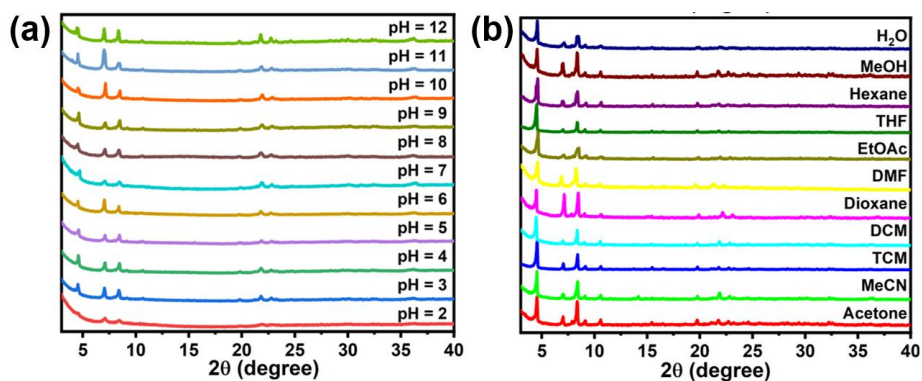

Fig. S59. Comparison of the PXRD patterns of JNU-205-Eu after being treated with (a) aqueous solutions at different pH values and (b) different organic solvents.

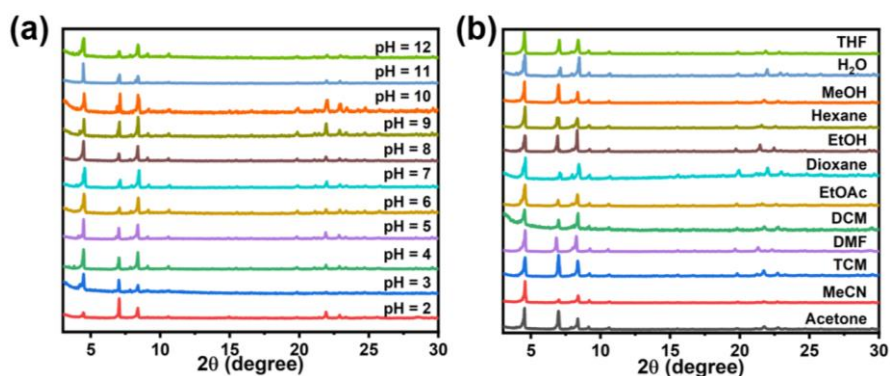

Fig. S60. Comparison of the PXRD patterns of JNU-206-Eu after being treated with (a) aqueous solutions at different pH values and (b) different organic solvents.

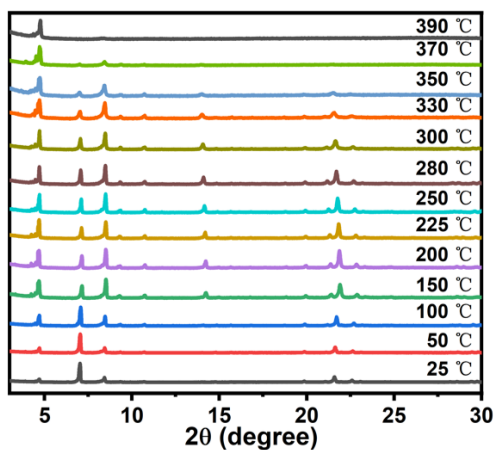

Fig. S61. *In-situ* variable-temperature PXRD (VT-PXRD) of **JNU-206-Eu**.

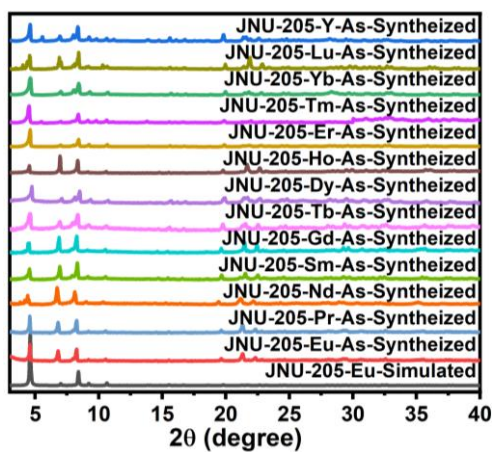

Fig. S62. PXRD patterns of **JNU-205-RE**.

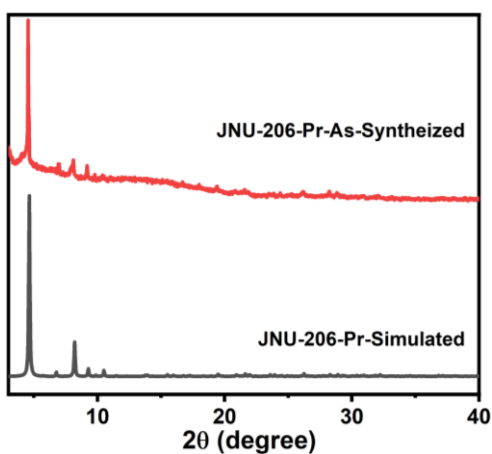

Fig. S63. PXRD patterns of **JNU-206-Pr**.

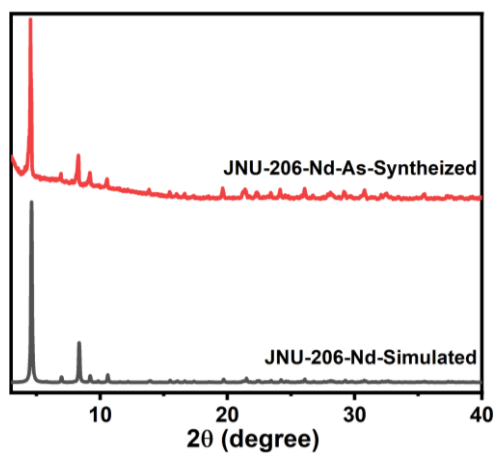

Fig. S64. PXRd patterns of **JNU-206-Nd**.

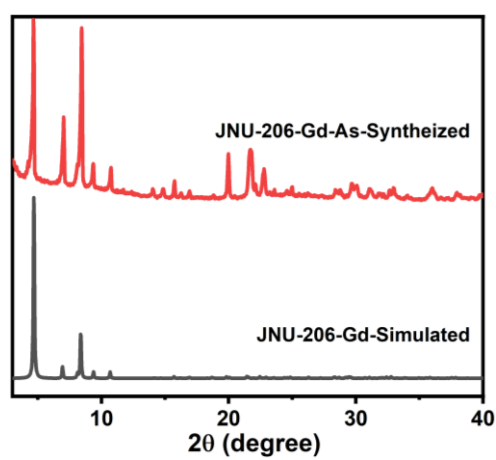

Fig. S65. PXRd patterns of **JNU-206-Gd**.

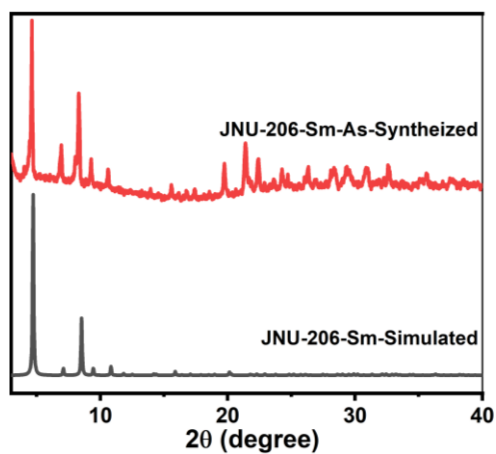

Fig. S66. PXRd patterns of **JNU-206-Sm**.

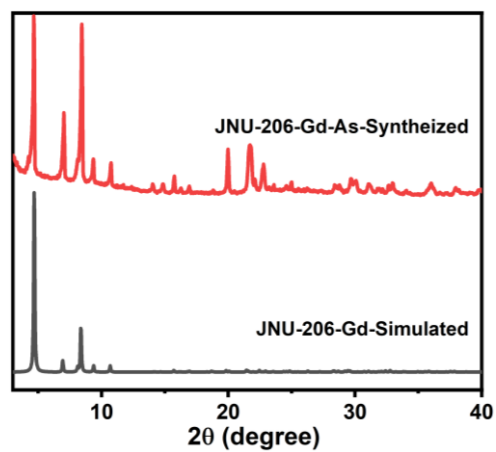

Fig. S67. PXRD patterns of **JNU-206-Gd**.

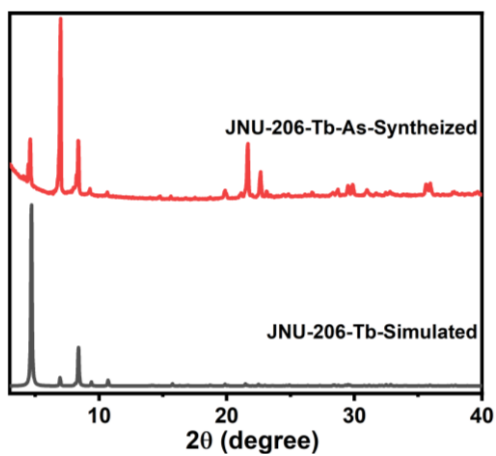

Fig. S68. PXRD patterns of **JNU-206-Tb**.

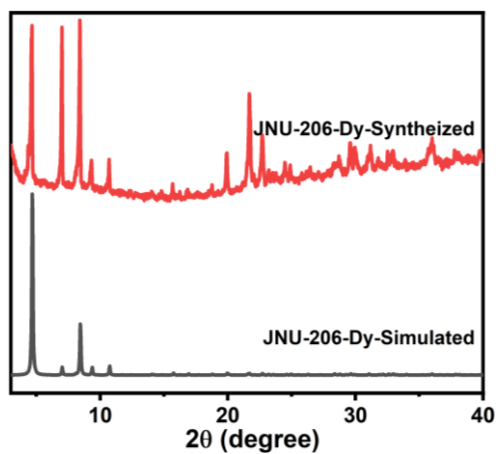

Fig. S69. PXRD patterns of **JNU-206-Dy**.

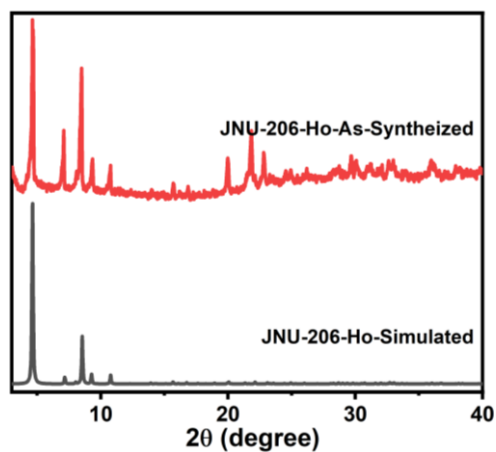

Fig. S70. PXRD patterns of **JNU-206-Ho**.

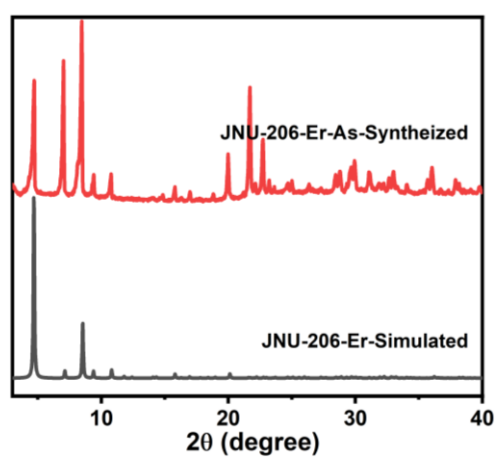

Fig. S71. PXRD patterns of **JNU-206-Er**.

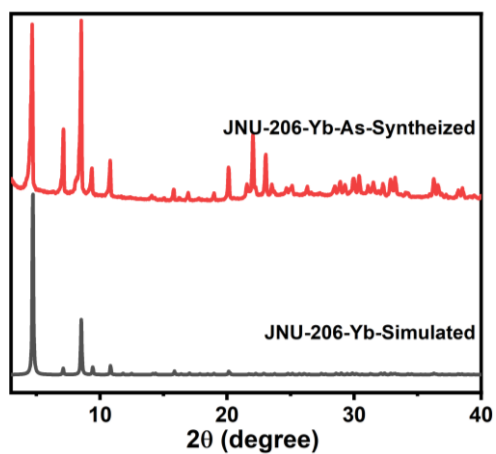

Fig. S72. PXRD patterns of **JNU-206-Yb**.

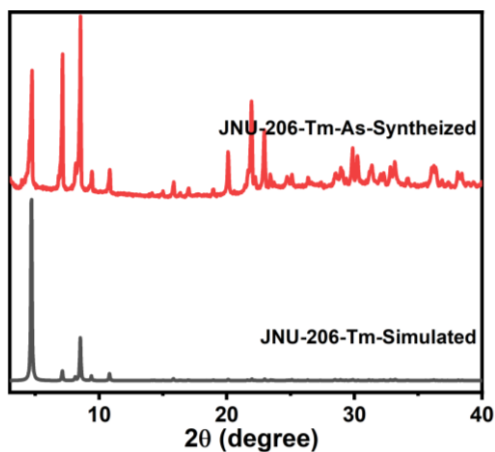

Fig. S73. PXRD patterns of **JNU-206-Tm**.

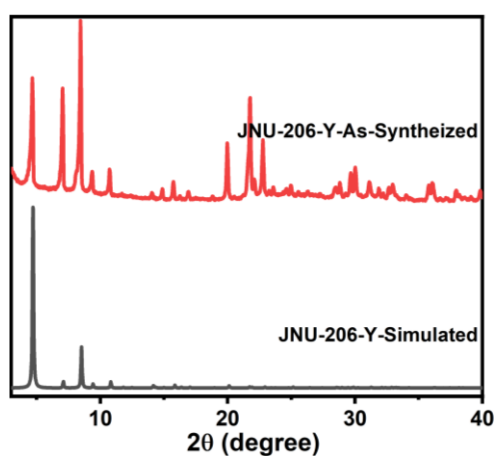

Fig. S74. PXRD patterns of **JNU-206-Y**.

## 2.10 Luminescence spectra of JNU-205-RE and JNU-206-RE

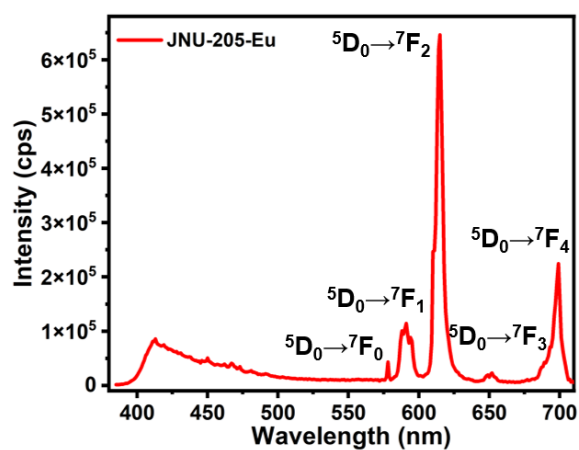

Fig. S75. Luminescence emission spectra ( $\lambda_{\text{ex}} = 365 \text{ nm}$ , slit = 2 nm) of **JNU-205-Eu**.

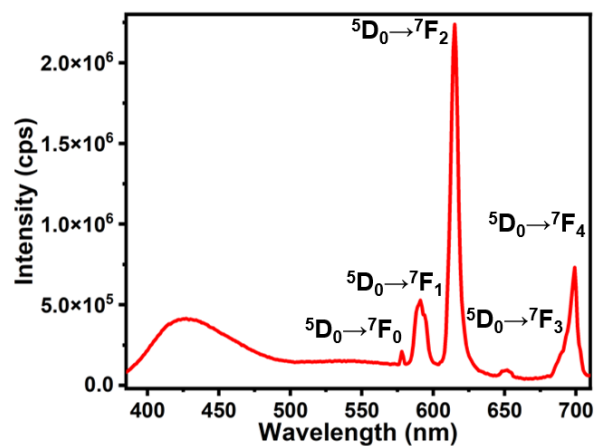

Fig. S76. Luminescence emission spectra ( $\lambda_{\text{ex}} = 365 \text{ nm}$ ) of **JNU-206-Eu** in aqueous suspensions.

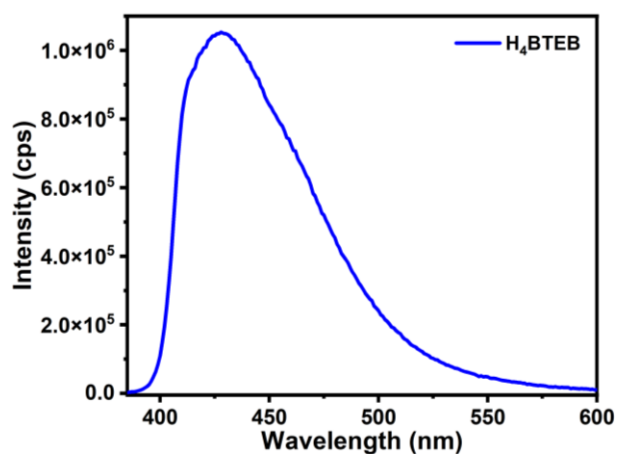

Fig. S77. Luminescence emission spectrum of **H<sub>4</sub>BTBE**.

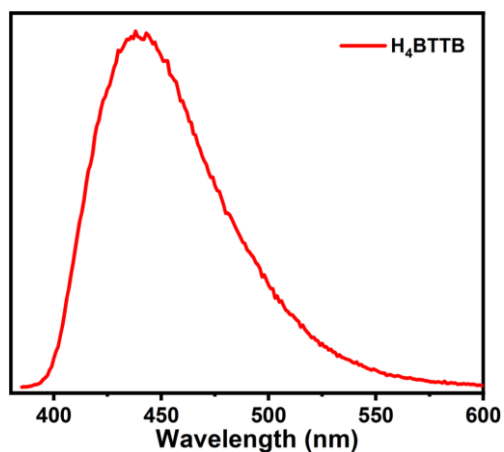

Fig. S78. Luminescence emission spectrum of **H<sub>4</sub>BTTB**.

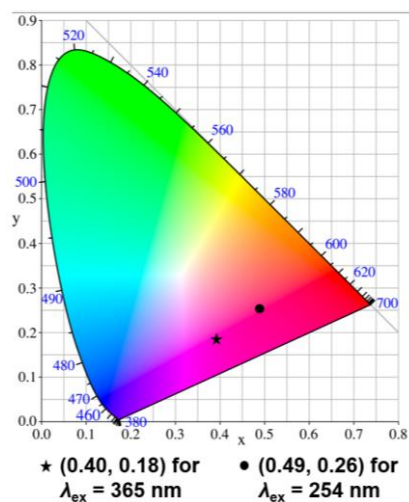

Fig. S79. CIE chromaticity diagram of **JNU-206-Eu** in solid state by varying excitation energy (at room temperature).

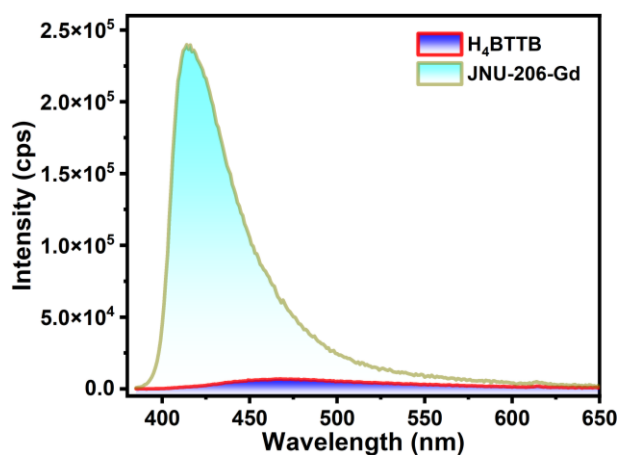

Fig. S80. Luminescence emission spectra of **H<sub>4</sub>BTTB** and **JNU-206-Gd** ( $\lambda_{\text{ex}} = 365$  nm, slit = 0.5).

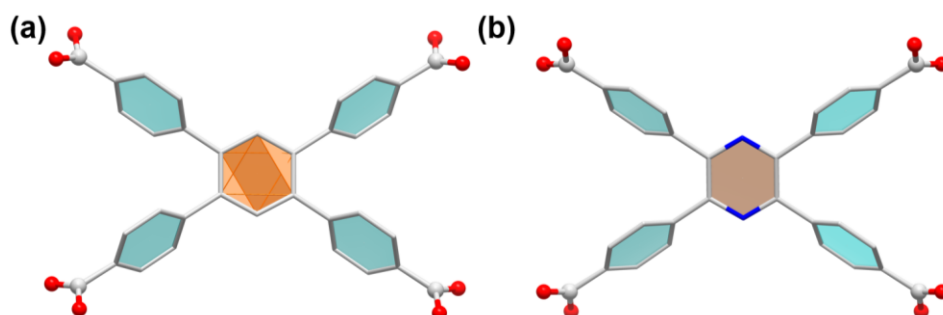

Fig. S81. Linker distortion between the phenyl plane and the pyrazinyl/phenyl plane (a) **BTEB** and (b) **BTTB**.



### Section 3. Luminescence sensing of tetracyclines

Luminescence studies were carried out by using aqueous suspensions of **JNU-206-Eu** at room temperature. Ground **JNU-206-Eu** (30 mg) was subjected to dispersion in deionized water (100 mL) and ultrasonication for half hour before uses. To 2.7 mL of the above-prepared **JNU-206-Eu** suspension, add 0.3 mL of aqueous solutions of TC, CTC, and OTC at different concentrations Their uminescence emissions were monitored.

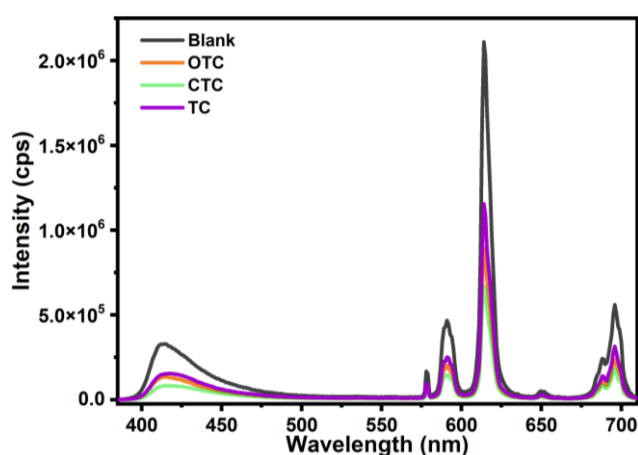

Fig. S82. Luminescent emission spectra of **JNU-206-Eu** suspensions in the presence of 0.5 mM of different antibiotics under excitation of 365 nm.

Table S15. Comparison of detection capacities of selected porous materials for tetracyclines (TCs).

| MOF Materials                               | TCs | linear range<br>( $\mu\text{M}$ ) | Quenching                       |                       | Solvent                     | Recyclability | Ref |
|---------------------------------------------|-----|-----------------------------------|---------------------------------|-----------------------|-----------------------------|---------------|-----|
|                                             |     |                                   | constant<br>( $\text{M}^{-1}$ ) | LOD ( $\mu\text{M}$ ) |                             |               |     |
| In-sbdc                                     | TC  |                                   |                                 | 0.28                  | Bis-Tris-HCl                |               |     |
|                                             | OTC | 0–30                              | NA                              | 0.30                  | buffer (10 mM,<br>pH = 6.0) | Yes           | 4   |
|                                             | CTC |                                   |                                 | 0.30                  |                             |               |     |
| PCN-128Y                                    | TC  | 0–1                               | $9.84 \times 10^5$              | 0.03                  | water                       | NA            | 5   |
| ([Tb(HL)L(H <sub>2</sub> O)] <sub>n</sub> ) | OTC | 0–50                              | $2.18 \times 10^4$              | 0.02                  | water                       | NA            | 6   |
|                                             | TC  | 0–50                              | $1.39 \times 10^4$              | 0.03                  |                             |               |     |
| Tb-MOF                                      | TC  | 100–244                           | $6.75 \times 10^3$              | 0.18                  | water                       | Yes           | 7   |
| Al-MOF@Mo/Zn-MOF                            | DOX | 0.001–<br>46.67                   | $3.32 \times 10^4$              | 0.56 nM               | water                       | Yes           | 8   |

|                                                                     |     |                 |                    |          |                                   |     |                  |
|---------------------------------------------------------------------|-----|-----------------|--------------------|----------|-----------------------------------|-----|------------------|
|                                                                     | TC  |                 | $3.51 \times 10^4$ | 0.53 nM  |                                   |     |                  |
|                                                                     | OTC | 0.001–53.33     | $3.22 \times 10^4$ | 0.58 nM  |                                   |     |                  |
|                                                                     | CTC |                 | $2.19 \times 10^4$ | 0.86 nM  |                                   |     |                  |
| Eu-MOF                                                              | TC  | 0–140           | $7.89 \times 10^3$ | 0.04     | water                             | NA  | 9                |
| RhB@ZIF-8                                                           | TC  |                 | $8.6 \times 10^4$  | 0.11     |                                   |     |                  |
|                                                                     | OTC | 0–46            | $7.6 \times 10^4$  | 0.14     | water                             | Yes | 10               |
| FSS@ZIF-8                                                           | TC  |                 | $4.6 \times 10^4$  | 0.17     |                                   |     |                  |
|                                                                     | OTC |                 | $5.5 \times 10^4$  | 0.16     |                                   |     |                  |
| NH <sub>2</sub> -MIL-53(Al)                                         | TC  | 0–73            | $4.6 \times 10^4$  | 0.02     | PBS (pH = 8.0,<br>0.01 M)         | NA  | 11               |
|                                                                     | DOX | 0–66.67         | $2.9 \times 10^4$  | 0.04     |                                   |     |                  |
|                                                                     | OTC | 0–86            | $1.9 \times 10^4$  | 0.06     |                                   |     |                  |
|                                                                     | DOX | 0.004–25.7 mg/L |                    |          |                                   |     |                  |
| ZIF-8/NH <sub>2</sub> -MIL-53(Al)                                   | TC  | 0.004–38.5 mg/L |                    | 1.2 μg/L | water                             | Yes | 12               |
|                                                                     | OTC | 0.004–32.1 mg/L | NA                 |          |                                   |     |                  |
|                                                                     | CTC | 0.005–25.7 mg/L |                    | 2.2 μg/L |                                   |     |                  |
| Eu <sub>2</sub> (BIPA) <sub>3</sub> (H <sub>2</sub> O)              | TC  | 0.05–60         | $8.77 \times 10^5$ | 3 nM     | aqueous solution (pH 9)           | NA  | 13               |
| FSS@MOF-5/GMP-Eu                                                    | TC  | 0–20            | $1.08 \times 10^5$ | 0.02     | DMF-water solution, 5/5, v/v      | NA  | 14               |
| Eu-CBO@ZIF-8                                                        | TC  | 0–70            | NA                 | 0.02     | water                             | NA  | 15               |
|                                                                     | DOX |                 | $2.81 \times 10^4$ | 11.76    |                                   |     |                  |
| {[Cd(2-F-tzba)(H <sub>2</sub> O)]·1.5H <sub>2</sub> O} <sub>n</sub> | TC  | 0–33.23         | $3.51 \times 10^4$ | 8.97     | water                             | Yes | 16               |
|                                                                     | OTC |                 | $2.44 \times 10^4$ | 13.53    |                                   |     |                  |
|                                                                     | CTC |                 | $1.79 \times 10^4$ | 18.39    |                                   |     |                  |
| {[Cd(3-F-tzba)(H <sub>2</sub> O)]·1.5H <sub>2</sub> O} <sub>n</sub> | DOX |                 | $2.66 \times 10^4$ | 12.40    |                                   |     |                  |
|                                                                     | TC  | 0–33.23         | $3.51 \times 10^4$ | 9.39     | water                             | Yes |                  |
|                                                                     | OTC |                 | $2.32 \times 10^4$ | 14.25    |                                   |     |                  |
|                                                                     | CTC |                 | $1.71 \times 10^4$ | 19.29    |                                   |     |                  |
| ZIF-8-on-Tb-dpn                                                     | TC  | 0–10            | $6.55 \times 10^5$ | 5.6 nM   | water                             | Yes | 17               |
| Zn-BTEC                                                             | CTC | 0–8             | $6.18 \times 10^6$ | 0.03     | Tris-HCl buffer solution (pH = 8) | NA  | 18               |
| JNU-205-Eu                                                          | OTC | 0–50            | $7.68 \times 10^3$ | 1.07     | water                             | Yes | <b>This work</b> |
| JNU-206-Eu                                                          | TC  | 0–80            | $1.33 \times 10^4$ | 0.62     | water                             | Yes | <b>This</b>      |

|     |      |                    |      |
|-----|------|--------------------|------|
| OTC | 0–50 | $2.37 \times 10^4$ | 0.35 |
| CTC | 0–80 | $2.3 \times 10^4$  | 0.36 |

work

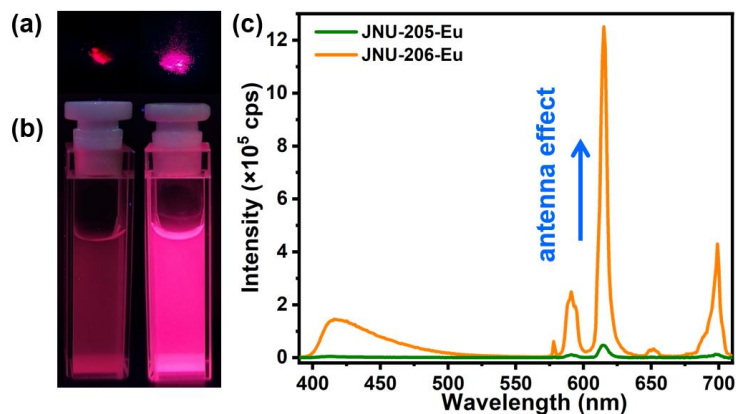

Fig. S83. Photographs of (a) Solid-state and (b) suspension-state **JNU-205-Eu** (left) and **JNU-206-Eu** (right) under hand-held 365 nm UV lamp. (c) Suspension-state emission spectra of **JNU-205-Eu** and **JNU-206-Eu** (30 mg/100 mL,  $\lambda_{\text{ex}} = 365$  nm, slit = 1 nm).

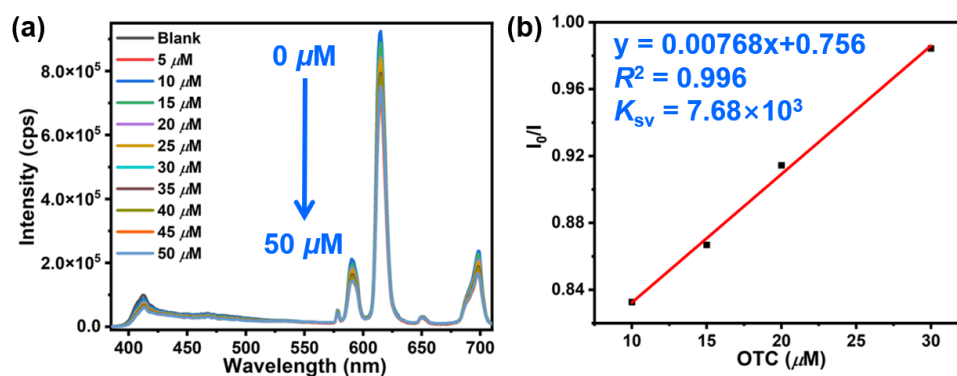

Fig. S84. (a) Luminescence titration of aqueous suspension of **JNU-205-Eu** with aqueous solution of OTC as titrant (0–50  $\mu\text{M}$ ) (b) S–V plot of  $I_0/I$  versus OTC concentration ( $\lambda_{\text{ex}} = 365$  nm, 10–30  $\mu\text{M}$ ).

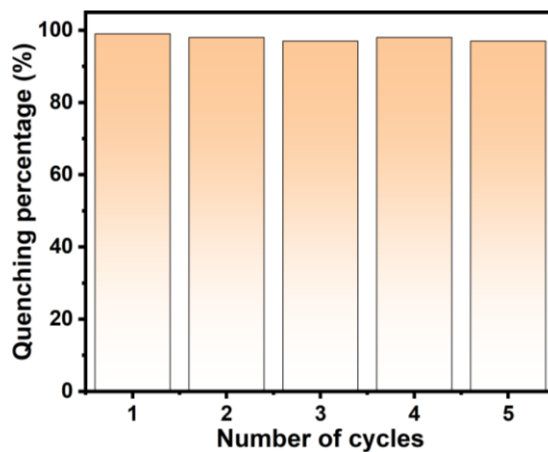

Fig. S85. Quenching efficiency of **JNU-206-Eu** in five cycles of sensing experiments.

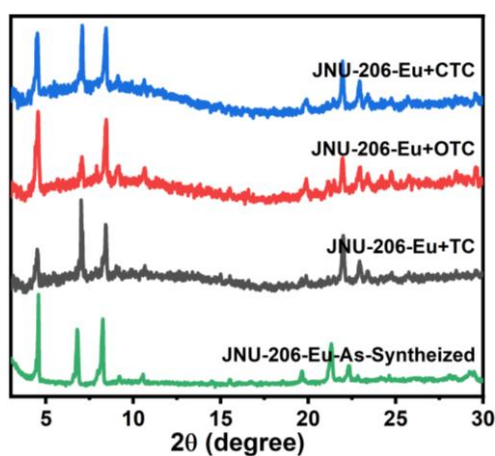

Fig. S86. PXRD patterns of **JNU-206-Eu** before and after being soaking in different aqueous solutions of antibiotics.

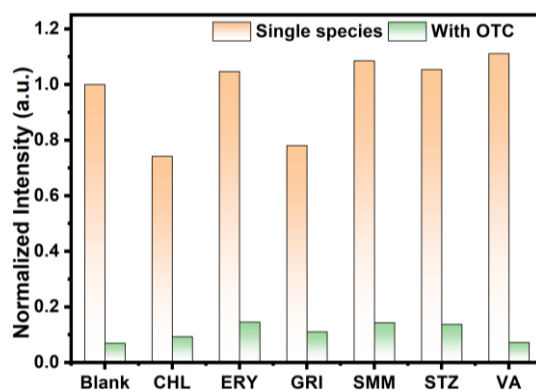

Fig. S87. Comparison of luminescence emission intensity (at 615 nm) of **JNU-206-Eu** upon addition of interfering antibiotics and then OTC.

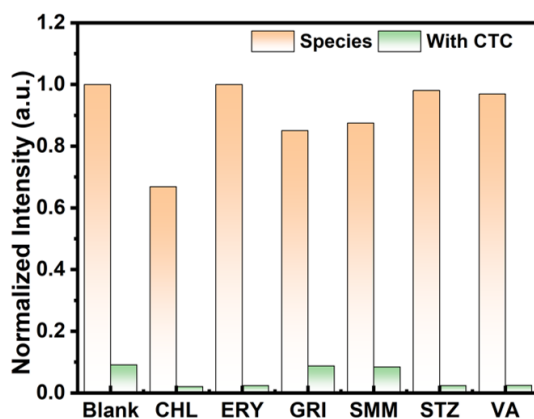

Fig. S88. Comparison of luminescence emission intensity (at 615 nm) of **JNU-206-Eu** upon addition of interfering antibiotics and then CTC.

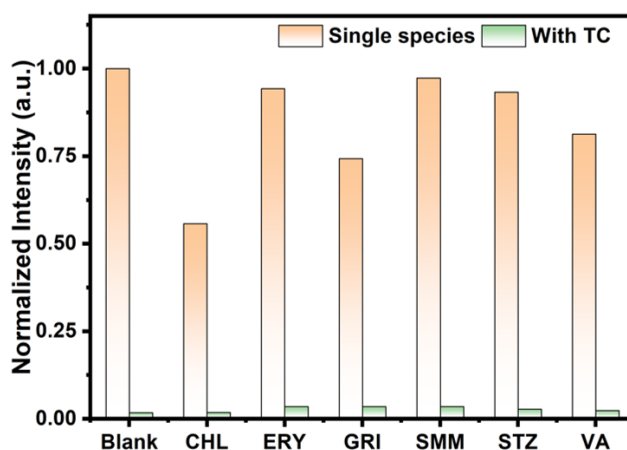

Fig. S89. Comparison of luminescence emission intensity (at 615 nm) of **JNU-206-Eu** upon addition of interfering antibiotics and then TC.

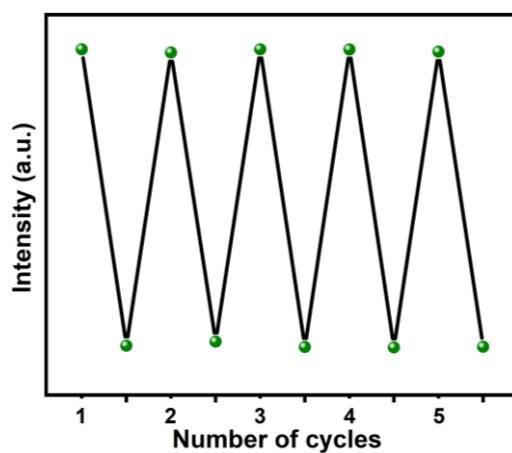

Fig. S90. Five cycles of sensing experiments of **JNU-206-Eu** for OTC in the presence of interfering antibiotics.

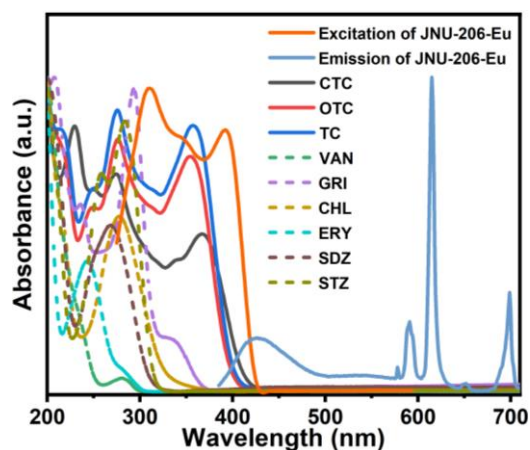

Fig. S91. UV–visible absorption spectra of antibiotics, and excitation and emission spectra of JNU-206-Eu.

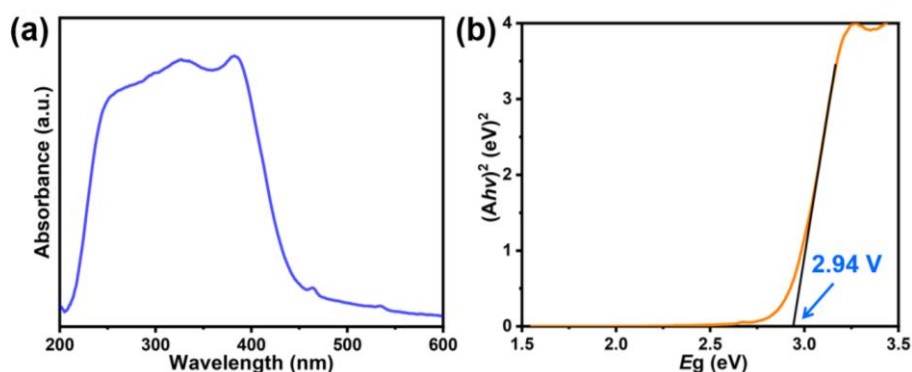

Fig. S92. (a) UV–visible diffuse reflectance spectrum of JNU-206-Eu; (b) Tauc plot for JNU-206-Eu.

## Section 4. Electrochemical measurements and computational details

### 4.1. Electrochemical measurements

Cyclic voltammetry (CV) measurements were performed on a CHI 660E electrochemical workstation with a three-electrode cell in the supporting electrolyte. The supporting electrolyte consists of a 0.1 M solution of tetrabutylammonium hexafluorophosphate (TBAPF<sub>6</sub>) in acetonitrile at a scan rate of 50 mV s<sup>-1</sup> at room temperature. Platinum plate was used as the working electrode, with Ag/AgNO<sub>3</sub> (0.1 M AgNO<sub>3</sub> in acetonitrile) as the reference electrode and platinum wire as the counter

electrode. The sample preparation method is as follows: 4 mg of sample powder was uniformly dispersed in 1 mL of methanol solution containing 100  $\mu\text{L}$  of 5 wt % Nafion, and the mixture was dropped on the surface of the Platinum plate electrode and dried in a oven. The  $\text{Ag}/\text{AgNO}_3$  reference electrode was calibrated using a ferrocene/ferrocenium redox couple as an external standard, whose oxidation potential is set at -4.80 eV with respect to zero vacuum level. Under this condition, the onset oxidation potential of ferrocene was  $-0.05\text{ V}$  versus  $\text{Ag}/\text{Ag}^+$ . The LUMO level was calculated according to the first reduction potential based on the equation  $E_{\text{LUMO}} = -(\varphi^{\text{red}} + 4.82)\text{ (eV)}$ .

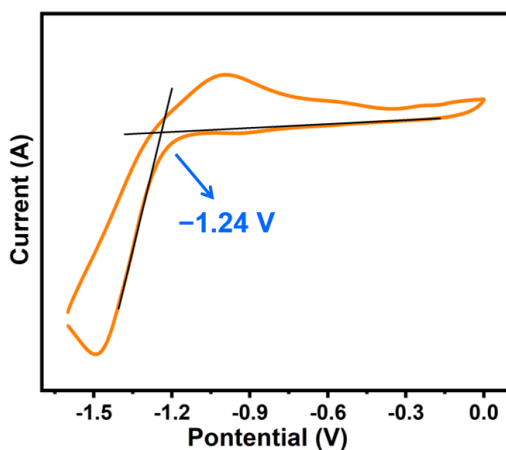

Fig. S93. CV curve of **JNU-206-Eu** in  $\text{CH}_3\text{CN}$

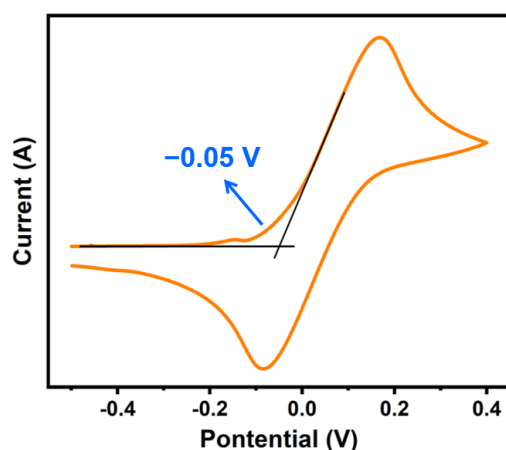

Fig. S94. CV curve of ferrocene in  $\text{CH}_3\text{CN}$ .

## 4.2. Computational details

The CTC, TC, and CTC molecules were fully optimized by density functional theory (DFT) employing B3LYP functional<sup>19</sup> with def2-tzvp basis set<sup>20</sup> for all atoms. All calculations were performed within Gaussian 09 program<sup>21</sup>.

## 4.3. Lifetime Decay of JNU-206-Eu

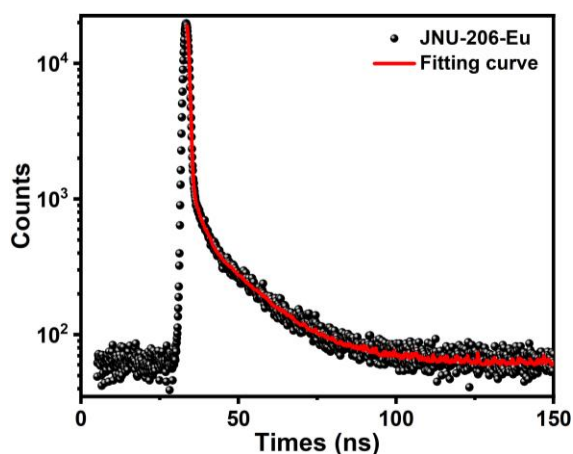

Fig. S95. Time-resolved fluorescence decay spectrum of **JNU-206-Eu**.

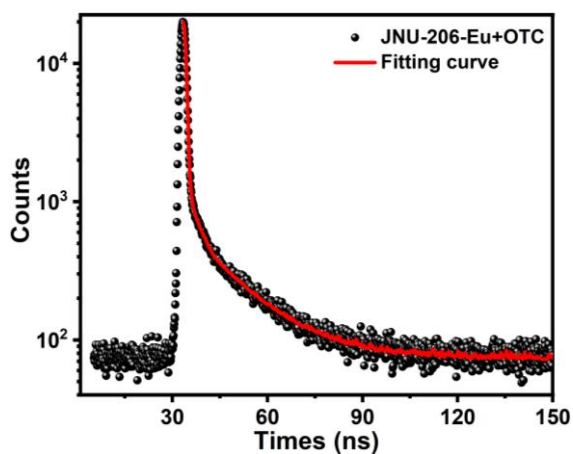

Fig. S96. Time-resolved fluorescence decay spectrum of **JNU-206-Eu+OTC**.

Table S16. Fitting data of the photoluminescence decay of **JNU-206-Eu** and **JNU-206-Eu+OTC**.

| A1 | A2 | A3 | $\tau_1$ | $\tau_2$ | $\tau_3$ | $\tau_{av}$ | Chi2 |
|----|----|----|----------|----------|----------|-------------|------|
|    |    |    |          |          |          | (ns)        |      |



|               |          |           |          |           |           |           |      |         |
|---------------|----------|-----------|----------|-----------|-----------|-----------|------|---------|
| <b>JNU-</b>   | 4.67659E | 1.629046E | 0.500968 | 1.828024E | 1.560675E | 2.507635E | 0.31 | 1.12618 |
| <b>206-Eu</b> | -03      | -03       | 8        | -09       | -08       | -10       | 5    | 3       |
| <b>JNU-</b>   | 4.81822E | 1.718022E | 0.487217 | 1.811645E | 1.536926E | 2.509547E | 0.31 | 1.08757 |
| <b>206-</b>   | -03      | -03       | 3        | -09       | -08       | -10       | 8    | 5       |
| <b>Eu+OT</b>  |          |           |          |           |           |           |      |         |
| <b>C</b>      |          |           |          |           |           |           |      |         |

$$\tau_{av} = (A1 \times \tau_1^2 + A2 \times \tau_2^2 + A3 \times \tau_3^2) / (A1 \times \tau_1 + A2 \times \tau_2 + A3 \times \tau_3).$$

#### 4.4. XPS of JNU-206-Eu

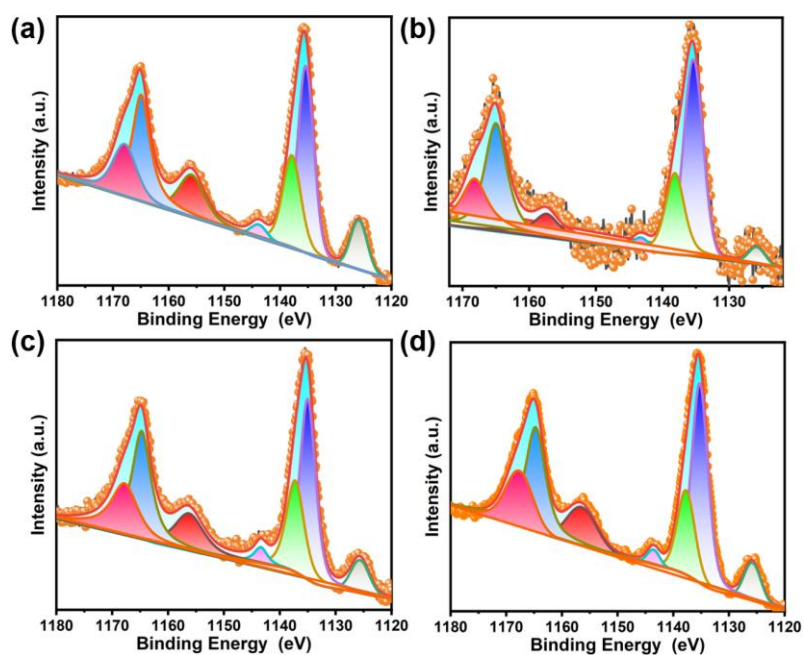

Fig. S97. Eu 3d XPS spectra of (a) **JNU-206-Eu**, (b) **JNU-206-Eu-OTC**, (c) **JNU-206-Eu-TC** and (d) **JNU-206-Eu-CTC**.

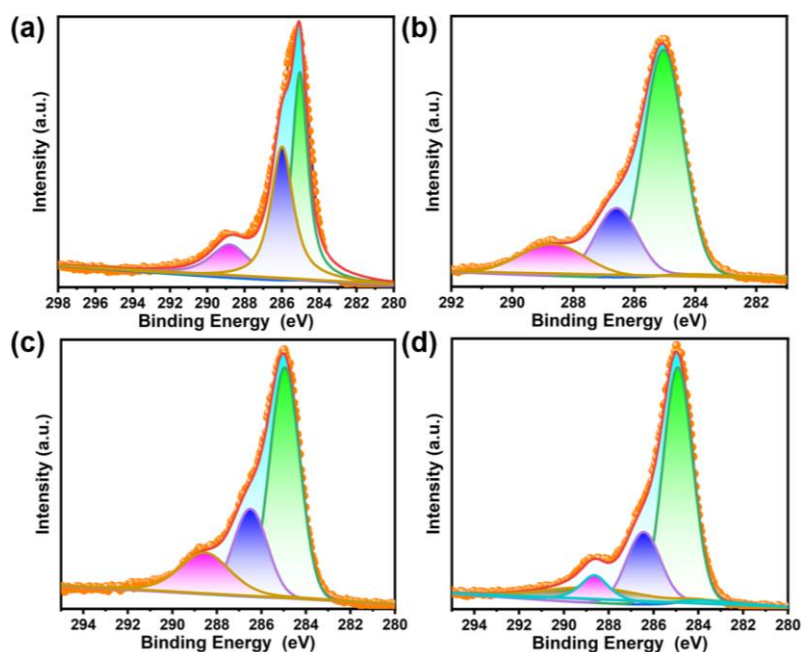

Fig. S98. C 1s XPS spectra of (a) JNU-206-Eu, (b) JNU-206-Eu-OTC, (c) JNU-206-Eu-TC and (d) JNU-206-Eu-CTC.

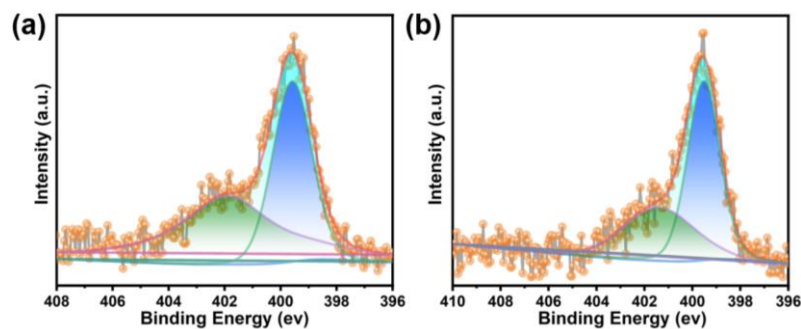

Fig. S99. N 1s XPS spectra of (a) JNU-206-Eu-TC and (d) JNU-206-Eu-CTC.

**Table S17.** XPS data for JNU-206-Eu, JNU-206-Eu-OTC, JNU-206-Eu-TC, and JNU-206-Eu-CTC.

|           | JNU-206-Eu       | JNU-206-Eu-OTC   | JNU-206-Eu-TC    | JNU-206-Eu-CTC   |
|-----------|------------------|------------------|------------------|------------------|
| <b>Eu</b> | 1125.85, 1135.39 | 1125.88, 1135.38 | 1125.64, 1135.00 | 1125.80, 1135.25 |
|           | 1137.90, 1143.80 | 1138.15, 1143.27 | 1137.26, 1143.38 | 1137.72, 1143.56 |
|           | 1155.88, 1164.96 | 1157.39, 1165.02 | 1156.22, 1164.73 | 1156.45, 1164.73 |
|           | 1167.90          | 1168.21          | 1167.77          | 1167.65          |
| <b>C</b>  | 285.04, 285.99   | 285.05, 286.58   | 284.95, 286.50   | 284.92, 286.45   |
|           | 288.80           | 288.68           | 288.54           | 288.69, 288.64   |
| <b>N</b>  | 399.58, 400.87   | 399.84, 402.20   | 399.56, 401.91   | 399.53, 401.39   |

#### 4.5. Fabrication of JNU-206-Eu-PCL strip

0.15 g of polycaprolactone (PCL,  $M_r \approx 80000$ ) was dissolved in 2 mL of dichloromethane. then, 15 mg of ground **JNU-206-Eu** was added to the solution. The mixture was stirred for 30 min to obtain well-dispersed solution, and the homogeneous solution was dropped onto the glass substrate at room temperature. The flexible membrane was obtained, washed with water, and air-dried.

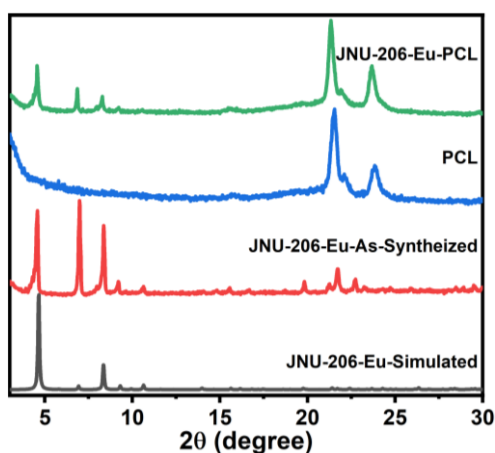

Fig. S100. PXRD patterns of **JNU-206-Eu-PCL**.

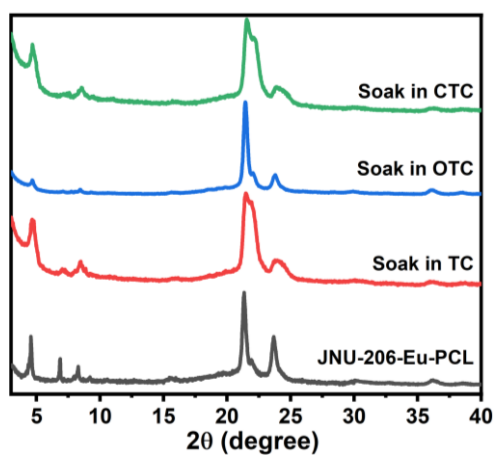

Fig. S101. PXRD patterns of **JNU-206-Eu-PCL** before and after being soaked in different aqueous solutions of antibiotics.

#### Appendix

$^1\text{H}$  and  $^{13}\text{C}$  NMR spectra for organic intermediates and linkers.

$^1\text{H}$  NMR (400 MHz,  $\text{CD}_2\text{Cl}_2$ ) spectrum of intermediate C.

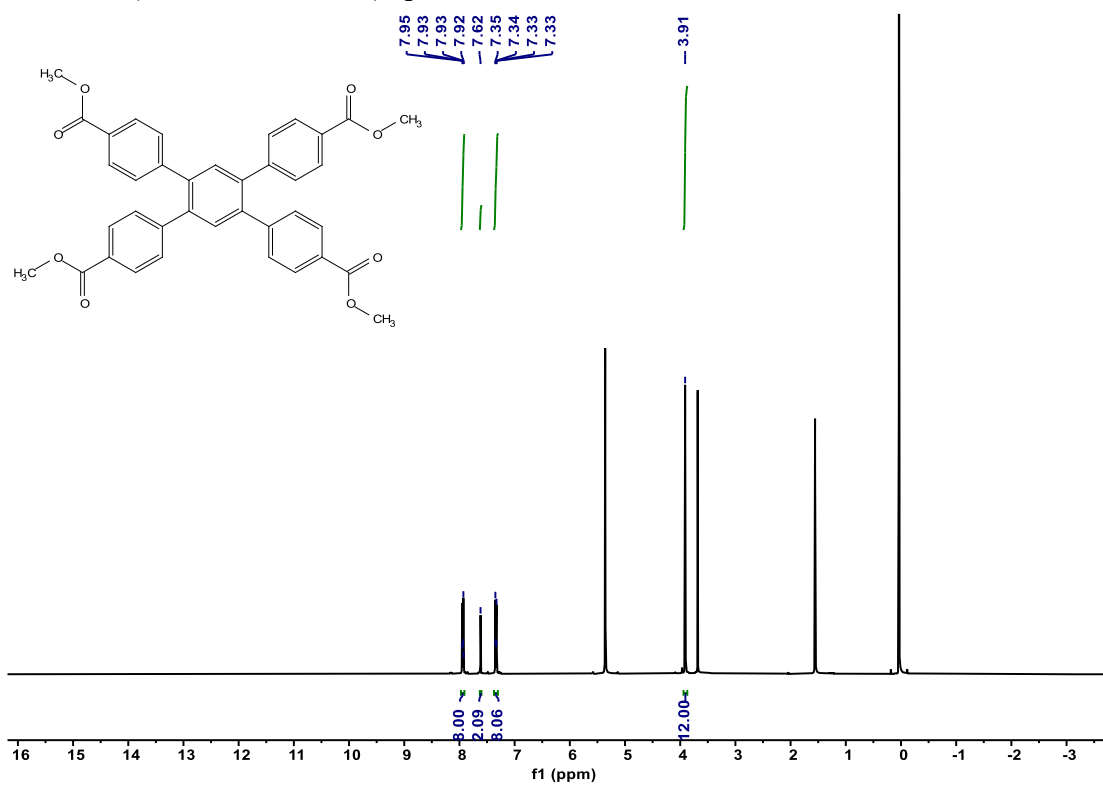

$^{13}\text{C}$  NMR (100 MHz,  $\text{CD}_2\text{Cl}_2$ ) spectrum of intermediate C.

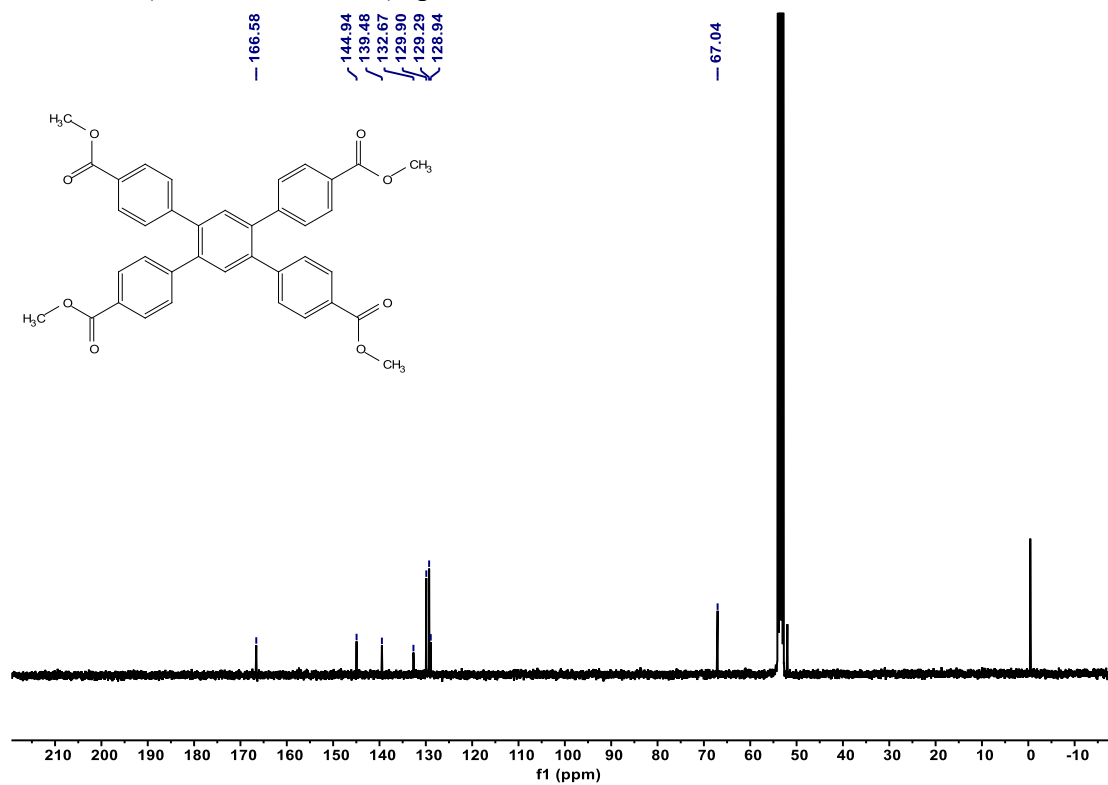

$^1\text{H}$  NMR (400 MHz, DMSO) spectrum of  $\text{H}_4\text{BTEB}$ .

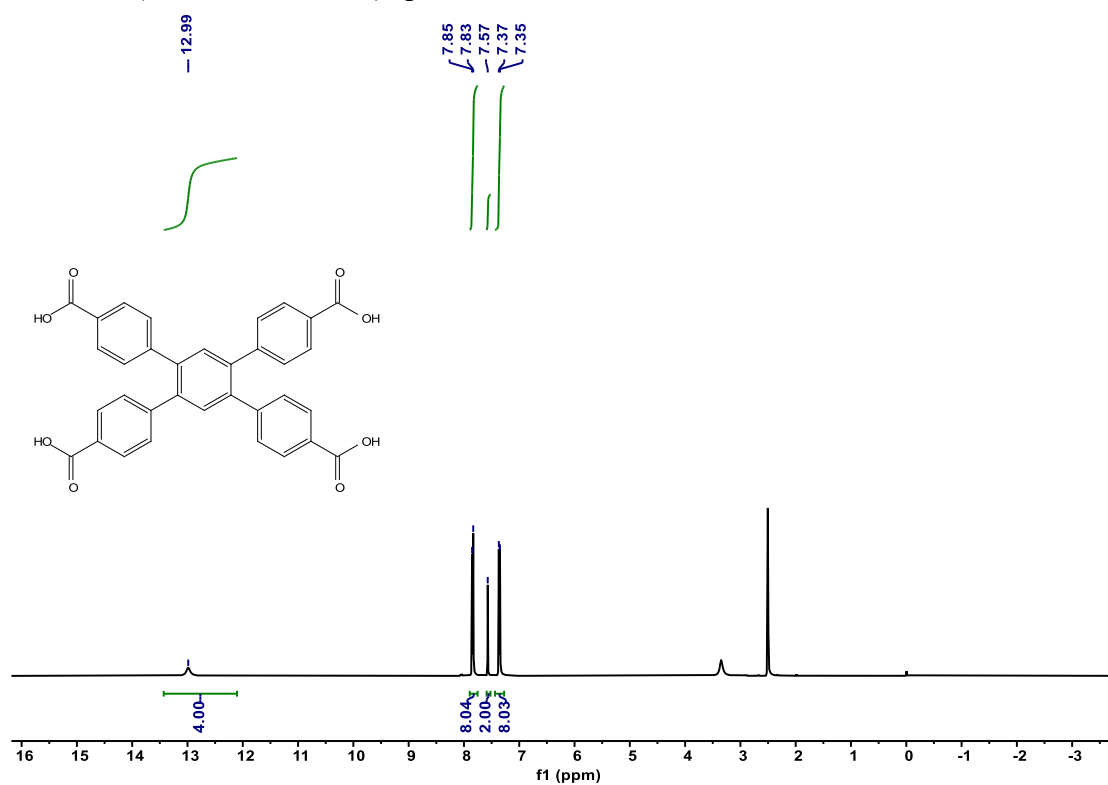

$^{13}\text{C}$  NMR (100 MHz, DMSO) spectrum of  $\text{H}_4\text{BTEB}$ .

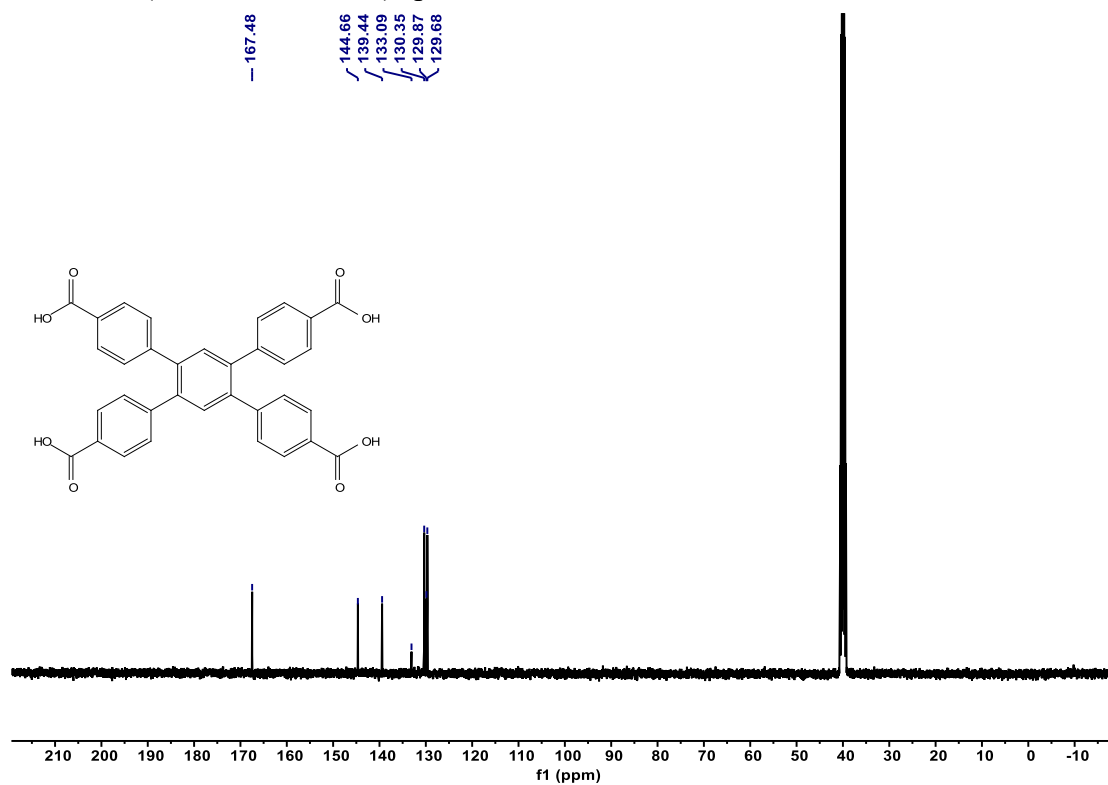

$^1\text{H}$  NMR (400 MHz,  $\text{CDCl}_3$ ) spectrum of intermediate E.

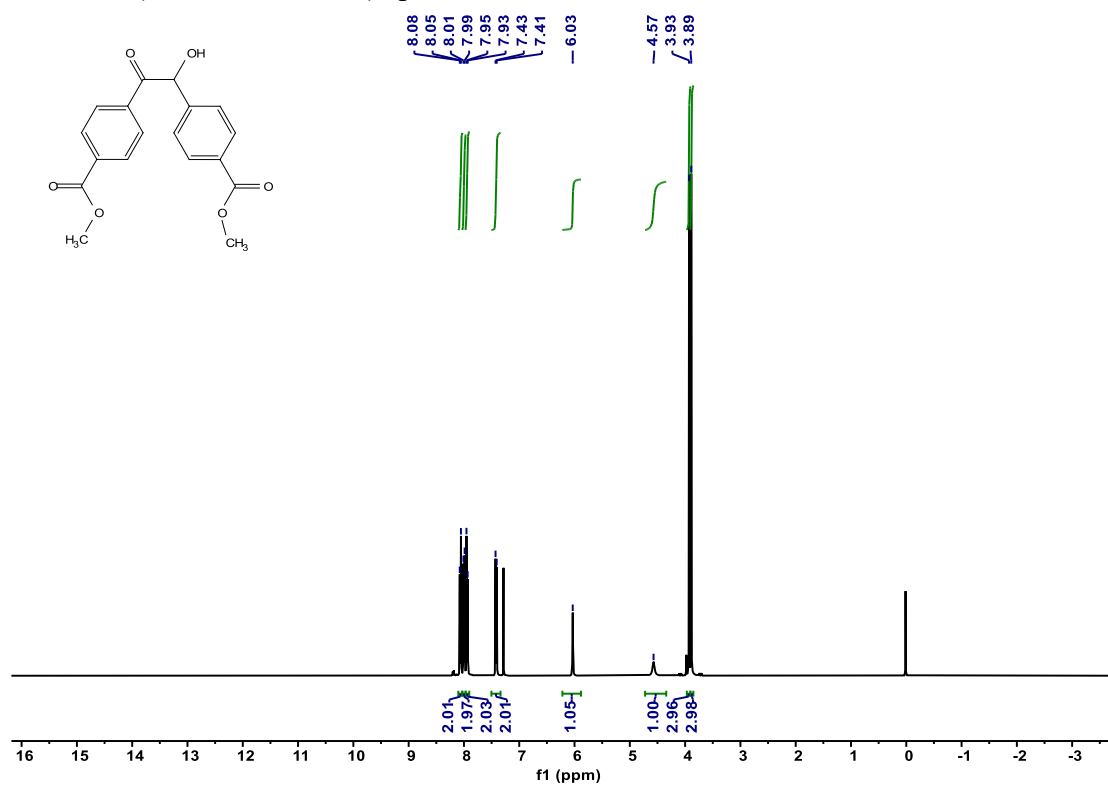

$^{13}\text{C}$  NMR (100 MHz,  $\text{CDCl}_3$ ) spectrum of intermediate E.

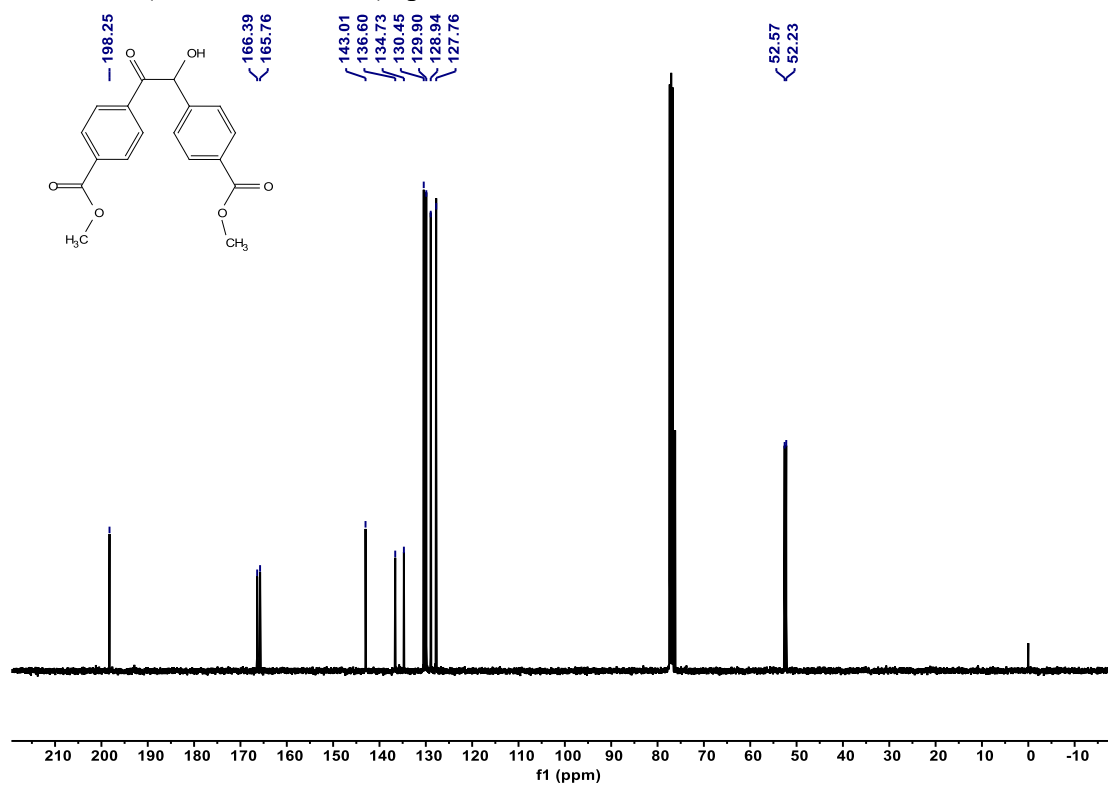

$^1\text{H}$  NMR (400 MHz,  $\text{CDCl}_3$ ) spectrum of intermediate F.

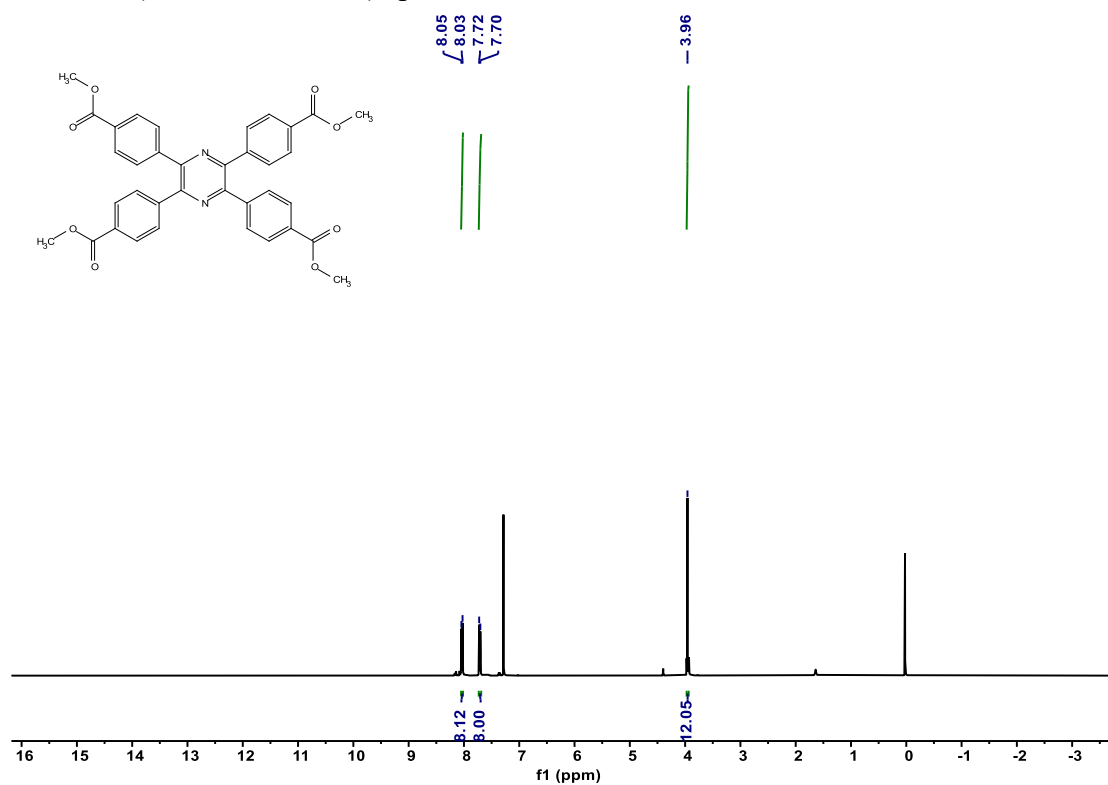

$^{13}\text{C}$  NMR (100 MHz,  $\text{CDCl}_3$ ) spectrum of intermediate F.

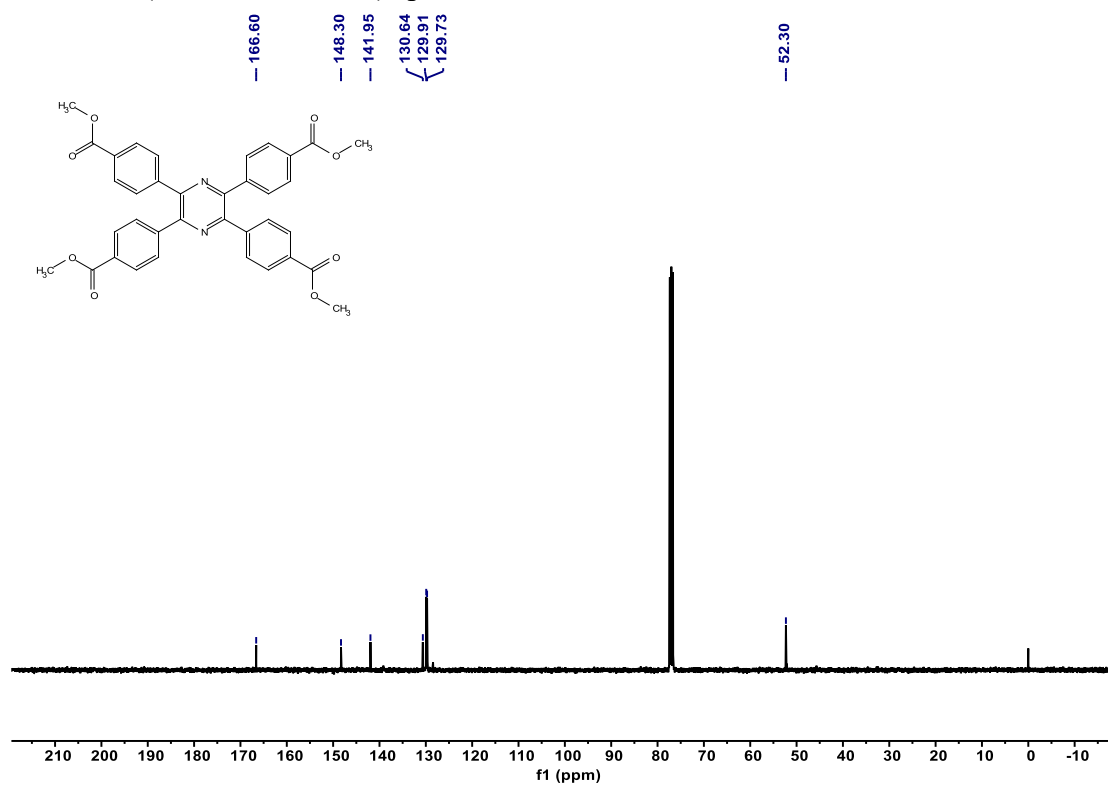

$^1\text{H}$  NMR (400 MHz,  $\text{CDCl}_3$ ) spectrum of  $\text{H}_4\text{BTTB}$ .

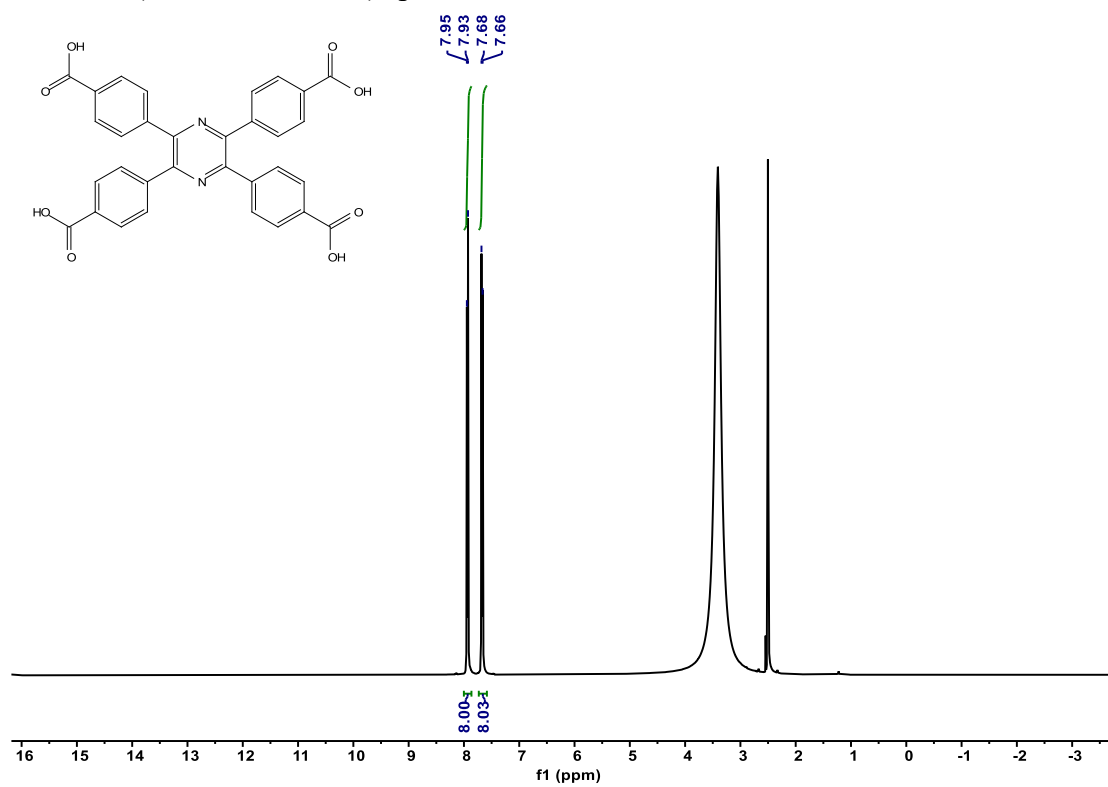

$^{13}\text{C}$  NMR (100 MHz, DMSO) spectrum of  $\text{H}_4\text{BTTB}$ .

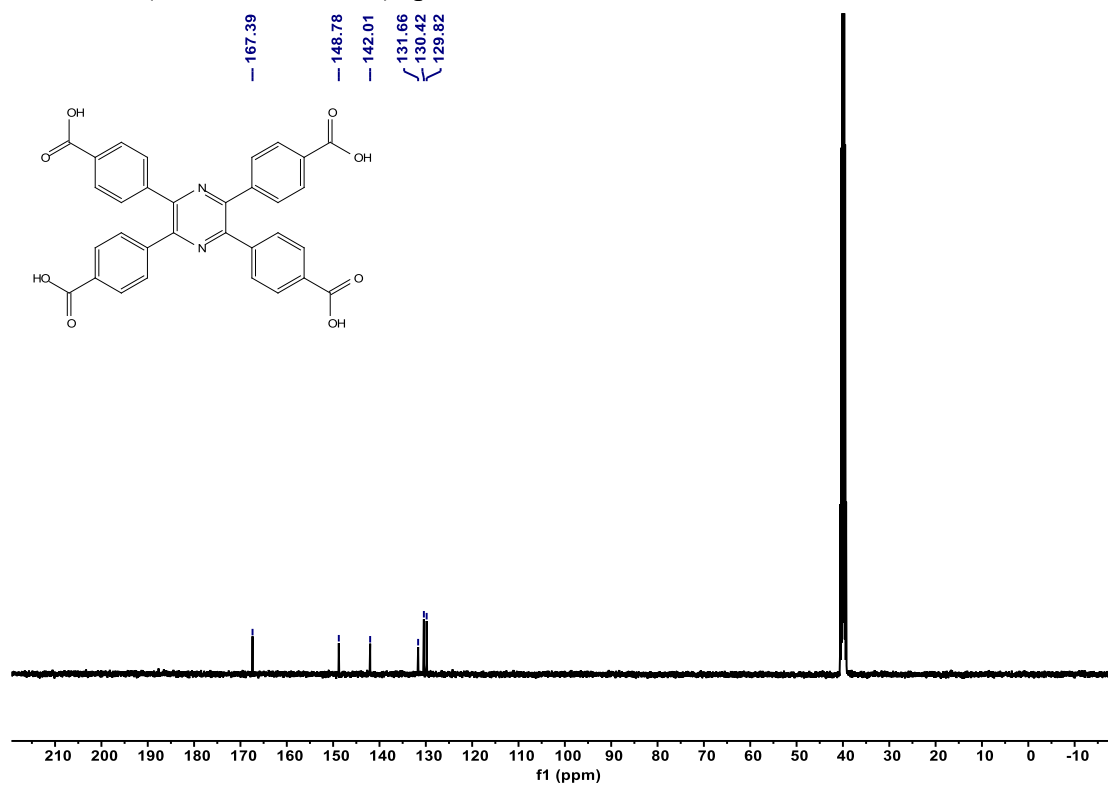



## Reference

1. K. Wu, J. Zheng, Y.-L. Huang, D. Luo, Y. Y. Li, W. Lu and D. Li, *J. Mater. Chem. C*, 2020, **8**, 16974-16983.
2. K. Wu, Y.-L. Huang, J. Zheng, D. Luo, M. Xie, Y. Y. Li, W. Lu and D. Li, *Mater. Chem. Front.*, 2021, **5**, 4300-4309.
3. I. A. Ibarra, P. A. Bayliss, E. Pérez, S. Yang, A. J. Blake, H. Nowell, D. R. Allan, M. Poliakoff and M. Schröder, *Green Chem.*, 2012, **14**, 117-122.
4. Q. Liu, D. Ning, W. J. Li, X. M. Du, Q. Wang, Y. Li and W. J. Ruan, *Analyst*, 2019, **144**, 1916-1922.
5. Y. Zhou, Q. Yang, D. Zhang, N. Gan, Q. Li and J. Cuan, *Sens. Actuators, B*, 2018, **262**, 137-143.
6. C. Li, C. Zeng, Z. Chen, Y. Jiang, H. Yao, Y. Yang and W. T. Wong, *J. Hazard. Mater.*, 2020, **384**, 121498.
7. X. Liu, Q. Ma, X. Feng, R. Li and X. Zhang, *Microchem. J.*, 2021, **170**, 106714.
8. C. Li, W. Yang, X. Zhang, Y. Han, W. Tang, T. Yue and Z. Li, *J. Mater. Chem. C*, 2020, **8**, 2054-2064.
9. Z. Gan, X. Hu, X. Xu, W. Zhang, X. Zou, J. Shi, K. Zheng and M. Arslan, *Food Chem.*, 2021, **354**, 129501.
10. Y. Q. Zhang, X. H. Wu, S. Mao, W. Q. Tao and Z. Li, *Talanta*, 2019, **204**, 344-352.
11. C. Li, L. Zhu, W. Yang, X. He, S. Zhao, X. Zhang, W. Tang, J. Wang, T. Yue and Z. Li, *J. Agric. Food. Chem.*, 2019, **67**, 1277-1283.
12. C. Li, X. Zhang, S. Wen, R. Xiang, Y. Han, W. Tang, T. Yue and Z. Li, *J. Hazard. Mater.*, 2020, **395**, 122615.
13. Y. Zhao, Q. Wang, H. Wang, H. Zhangsun, X. Sun, T. Bu, Y. Liu, W. Wang, Z. Xu and L. Wang, *Sens. Actuators, B*, 2021, **334**, 129610.
14. Z. Gan, W. Zhang, J. Shi, X. Xu, X. Hu, X. Zhang, X. Wang, M. Arslan, J. Xiao and X. Zou, *Dyes and Pigments*, 2021, **194**.
15. N. Wu, H. Guo, M. Wang, Y. Cao, L. Sun, F. Yang, T. Zhang, L. Peng, Y. Liu and W. Yang, *Anal. Chim. Acta*, 2022, **1190**, 339247.
16. H.-H. Wang, Y. Zhang, D.-B. Yang, L. Hou, Z.-Y. Li and Y.-Y. Wang, *Cryst. Growth Des.*, 2021, **21**, 2488-2497.
17. T. Sun, R. Fan, J. Zhang, M. Qin, W. Chen, X. Jiang, K. Zhu, C. Ji, S. Hao and Y. Yang, *ACS Appl. Mater. Interfaces*, 2021, **13**, 35689-35699.
18. L. Yu, H. Chen, J. Yue, X. Chen, M. Sun, H. Tan, A. M. Asiri, K. A. Alamry, X. Wang and S. Wang, *Anal. Chem.*, 2019, **91**, 5913-5921.
19. G. Bussi, D. Donadio and M. Parrinello, *J. Chem. Phys.*, 2007, **126**, 014101.
20. F. Weigend, *Phys. Chem. Chem. Phys.*, 2006, **8**, 1057-1065.
21. G. W. T. H. B. S. G. E. S. M. A. R. J. R. C. G. S. V. B. B. M. M. J. Frisch and D. J. Fox, *Gaussian 09, Inc. Wallingford CT*, 2009.
